1 **Title:** The seminal odorant binding protein Obp56g is required for mating plug formation and  
2 male fertility in *Drosophila melanogaster*

3  
4 **Authors:** Nora C. Brown<sup>1</sup>, Benjamin Gordon<sup>1,2</sup>, Caitlin E. McDonough-Goldstein<sup>3</sup>, Snigdha  
5 Misra<sup>1,4</sup>, Geoffrey D. Findlay<sup>1,5</sup>, Andrew G. Clark<sup>\*1</sup>, Mariana F. Wolfner<sup>\*1</sup>

6 1. Department of Molecular Biology and Genetics, Cornell University, Ithaca, NY, United States

7 2. Present address: Department of Physiology and Biophysics, University of Illinois College of  
8 Medicine, Chicago, IL, United States

9 3. Department of Evolutionary Biology, University of Vienna, Vienna, Austria

10 4. Present address: University of Petroleum and Energy Studies, Dehradun, UK, India

11 5. Department of Biology, College of the Holy Cross, Worcester, MA, United States

12

13 \*Corresponding authors:

14 Andrew G. Clark

15 227 Biotechnology Bldg.

16 526 Campus Road

17 Ithaca, NY 14853-2703

18 ac347@cornell.edu

19

20 Mariana F. Wolfner

21 423 Biotechnology Bldg.

22 526 Campus Road

23 Ithaca, NY 14853-2703

24 mfw5@cornell.edu

25

26 ORCID IDs:

27 0000-0001-8567-1273 (NCB)

28 0000-0002-3856-0500 (BG)

29 0000-0001-8949-7479 (CEMG)

30 0000-0001-9435-4464 (SM)

31 0000-0001-8052-2017 (GDF)

32 0000-0001-7159-8511 (AGC)

33 0000-0003-2701-9505 (MFW)

34

35 **Abstract:**

36 In *Drosophila melanogaster* and other insects, the seminal fluid proteins (SFPs) and male sex  
37 pheromones that enter the female with sperm during mating are essential for fertility and induce  
38 profound post-mating effects on female physiology and behavior. The SFPs in *D. melanogaster*  
39 and other taxa include several members of the large gene family known as odorant binding  
40 proteins (Obps). Previous work in *Drosophila* has shown that some *Obp* genes are highly  
41 expressed in the antennae and can mediate behavioral responses to odorants, potentially by  
42 binding and carrying these molecules to odorant receptors. These observations have led to the  
43 hypothesis that the seminal Obps might act as molecular carriers for pheromones or other  
44 compounds important for male fertility in the ejaculate, though functional evidence in any  
45 species is lacking. Here, we used RNAi and CRISPR/Cas9 generated mutants to test the role of  
46 the seven seminal Obps in *D. melanogaster* fertility and the post-mating response (PMR). We  
47 found that *Obp56g* is required for male fertility and the induction of the PMR, whereas the other  
48 six genes had no effect on fertility when mutated individually. *Obp56g* is expressed in the male's  
49 ejaculatory bulb, an important tissue in the reproductive tract that synthesizes components of  
50 the mating plug. We found males lacking *Obp56g* fail to form a mating plug in the mated  
51 female's reproductive tract, leading to ejaculate loss and reduced sperm storage. We also  
52 examined the evolutionary history of these seminal *Obp* genes, as several studies have  
53 documented rapid evolution and turnover of SFP genes across taxa. We found extensive lability  
54 in gene copy number and evidence of positive selection acting on two genes, *Obp22a* and  
55 *Obp51a*. Comparative RNAseq data from the male reproductive tract of multiple *Drosophila*  
56 species revealed that *Obp56g* shows high male reproductive tract expression only in species of  
57 the *melanogaster* and *obscura* groups, though conserved head expression in all species tested.  
58 Together, these functional and expression data suggest that *Obp56g* may have been co-opted  
59 for a reproductive function over evolutionary time.

60  
61  
62  
63  
64  
65  
66  
67  
68

69 **Introduction:**

70 In many taxa, males transfer non-sperm seminal fluid proteins (SFPs) in the ejaculate to  
71 females during mating. Odorant binding proteins (Obps) are a common class of SFPs, which  
72 have been found in the seminal fluid (or expressed in male reproductive tissues) in a variety of  
73 invertebrate species such as mosquitoes (Sirot et al., 2008), honeybees (Baer et al., 2012), flour  
74 beetles (Xu et al., 2013), bollworm moths (Sun et al., 2012), tsetse flies (Savini et al., 2021) and  
75 *Drosophila* (Begun et al., 2006; Findlay et al., 2008; Karr et al., 2019; Kelleher et al., 2009).  
76 Obps have also been described in the seminal fluid of rabbits and the vaginal fluid of hamsters,  
77 though vertebrate and insect *Obp* genes are considered non-homologous and have different  
78 structures (Mastrogiacomo et al., 2014; Singer et al., 1986; Vieira and Rozas, 2011). Despite  
79 their widespread appearance in male seminal fluid across species, the reproductive functions of  
80 these Obps are entirely uncharacterized.

81  
82 In *Drosophila melanogaster*, there are 52 members in the *Obp* gene family, many of which are  
83 highly expressed and extremely abundant in olfactory tissues such as antennae and maxillary  
84 palps (Rihani et al., 2021; Sun et al., 2018; Vieira and Rozas, 2011). In contrast to odorant  
85 receptors, several of which respond to specific odorants *in vivo*, Obps are less well  
86 characterized functionally (Ai et al., 2010; Gomez-Diaz et al., 2013; Ha and Smith, 2006; Hallem  
87 and Carlson, 2006; Jeong et al., 2013; Sun et al., 2018; Xiao et al., 2019; Xu et al., 2005). Some  
88 Obps bind odorants *in vitro*, and mutants of *Obp76a* (*lush*) show abnormal behavioral  
89 responses to alcohols and the male sex pheromone cis-vaccenyl acetate (cVA) (Billeter and  
90 Levine, 2015; Kim et al., 1998; Xu et al., 2005). These data, combined with the presence of  
91 Obps in the aqueous sensillar lymph that surrounds the dendrites of odorant receptor neurons,  
92 have led to the model that Obps bind hydrophobic odorants and help transport them across the  
93 lymph to their receptors (reviewed in Rihani et al., 2021). However, recent functional data  
94 demonstrating robust olfactory responses in the absence of abundant antennal Obps complicate  
95 this model and suggest Obps may have roles beyond strictly facilitating chemosensation (Xiao  
96 et al., 2019).

97  
98 Obps are widely divergent at the amino acid level in *Drosophila*, sharing about 20% average  
99 pairwise amino acid identity gene family-wide (Hekmat-Safe et al., 2002; Vieira et al., 2007).  
100 However, they share a conserved pattern of 6 cysteines with conserved spacing, which  
101 contribute to the formation of disulfide bonds that stabilize the alpha-helical structure (Rihani et  
102 al., 2021; Vieira et al., 2007; Vieira and Rozas, 2011). Evolutionarily, divergence in *Obp* gene

103 copy number in *Drosophila* is consistent with birth-and-death models of gene family evolution,  
104 with new members arising via duplication (Rondón et al., 2022; Vieira et al., 2007; Vieira and  
105 Rozas, 2011). Genic and expression divergence have been reported for several Obps across  
106 *Drosophila*, leading to the hypothesis that turnover in this family may be important for the  
107 evolution of substrate preference and niche colonization (Kopp et al., 2008; Matsuo, 2008;  
108 Matsuo et al., 2007; Pal et al., 2022; Yasukawa et al., 2010). However, Obps in *Drosophila* and  
109 other species have wide expression patterns in larval and adult tissues (including non-  
110 chemosensory tissues), suggesting diverse roles for these proteins beyond chemosensation  
111 (reviewed in (Rihani et al., 2021)). Indeed, *Obp28a* has been implicated as a target of regulation  
112 by the gut microbiota, which stimulates larval hematopoiesis in *Drosophila* and tsetse flies  
113 (Benoit et al., 2017).

114  
115 In *Drosophila*, two olfactory Obps have been implicated in male mating behavior: *Obp76a* (*lush*)  
116 and *Obp56h* (Billeter and Levine, 2015; Shorter et al., 2016; Xu et al., 2005). In males, *lush* is  
117 required for proper chemosensation of cVA in mated females through the action of *Or67d* in T1  
118 trichoid sensilla (Billeter and Levine, 2015; Kurtovic et al., 2007; Laughlin et al., 2008; Xu et al.,  
119 2005). Knockdown of *Obp56h* in males decreases mating latency and alters pheromone  
120 profiles, including a strong reduction in the inhibitory sex pheromone 5-tricosene (5-T),  
121 indicating *Obp56h* might be involved in sex pheromone production or detection (Shorter et al.,  
122 2016).

123  
124 In addition to the Obps that are transferred in the seminal fluid, intriguingly, several tissues in *D.*  
125 *melanogaster* males produce sex-specific pheromones that are transferred to females during  
126 mating. These pheromones include oenocyte-derived 7-tricosene (7-T), ejaculatory bulb-derived  
127 cVA and (3R,11Z,19Z)-3-acteoxy-11,19-octacosadien-1-ol (CH503), and accessory gland-  
128 derived peptide prohormones (such as Sex Peptide, discussed below) (Brieger and Butterworth,  
129 1970; Everaerts et al., 2010; Guiraudie-Capraz et al., 2007; Scott, 1986; Yew et al., 2009).  
130 These molecules have been shown to act individually (in the case of Sex Peptide and CH503)  
131 or synergistically in a blend (in the case of cVA and 7-T) to decrease the attractiveness or  
132 remating rate of females with other males (reviewed in (Billeter and Wolfner, 2018), (Laturney  
133 and Billeter, 2016)). The coincidence of pheromones and Obps being transferred in the seminal  
134 fluid during mating have led many to hypothesize that Obps could act as molecular carriers for  
135 these molecules in mating, though direct evidence that seminal Obps impact any aspect of  
136 female post-mating behavior is lacking.

137

138 *D. melanogaster* SFPs are produced and secreted by the tissues in the male reproductive tract,  
139 including the testes, accessory glands (AGs), ejaculatory duct (ED), and ejaculatory bulb (EB)  
140 (reviewed in Wigby et al., 2020). Many SFPs are essential for optimal fertility and the induction  
141 of the post-mating response (PMR), a collection of behavioral and physiological changes in  
142 mated females that include increased egg laying and decreased likelihood of remating  
143 (reviewed in (Avila et al., 2011; Wigby et al., 2020)). The induction and maintenance of this  
144 response requires the SFPs Sex Peptide (SP) and the long-term response network proteins,  
145 which act in a pathway to bind SP to sperm in the female sperm storage organs (Findlay et al.,  
146 2014; Ravi Ram and Wolfner, 2009; Singh et al., 2018). Disrupting the presence of sperm in  
147 storage, the transfer of SP/network proteins, or the binding and release of SP from sperm leads  
148 to a loss of the persistence of the PMR and decreased fertility of the mating pair (Findlay et al.,  
149 2014; Kalb et al., 1993; Liu and Kubli, 2003; Misra et al., 2022; Peng et al., 2005; Ravi Ram and  
150 Wolfner, 2009; Singh et al., 2018).

151

152 A subset of the genes that encode SFPs display interesting evolutionary patterns in many taxa,  
153 including elevated sequence divergence consistent with positive selection (or in some cases,  
154 relaxed selection), tandem gene duplication, rapid turnover between species, and gene co-  
155 option (Ahmed-Braimah et al., 2017; Begun et al., 2006; Begun and Lindfors, 2005; Findlay et  
156 al., 2009, 2008; Haerty et al., 2007; McGeary and Findlay, 2020; Mueller et al., 2005; Patlar et  
157 al., 2021; Sirot et al., 2014; Swanson et al., 2001; Swanson and Vacquier, 2002). In studies of  
158 *Drosophila*, the Obps present in the seminal fluid are composed of both overlapping and distinct  
159 sets of proteins between species, mirroring a common feature of SFP evolution: conservation of  
160 functional class despite turnover of the individual genes (Findlay et al., 2009, 2008; Karr et al.,  
161 2019; Kelleher et al., 2009; Mueller et al., 2004). This pattern is thought to be driven by sexual  
162 selection such as sperm competition and male/female intra-sexual conflict, which has been  
163 hypothesized to drive molecular arms races between or within the sexes while maintaining  
164 functionality of the reproductive system (Avila et al., 2011; Sirot et al., 2015).

165

166 Here, we investigate the evolution and reproductive function of seven *D. melanogaster* seminal  
167 Obps (Obp8a, Obp22a, Obp51a, Obp56e, Obp56f, Obp56g, and Obp56i) that have been shown  
168 to be transferred to females during mating or expressed in SFP-generating tissues (Findlay et  
169 al., 2008; Sepil et al., 2019). Using a functional genetic approach, we find that six of the seminal  
170 Obps have no or a very marginal effect on the PMR in mated females. However, one Obp,

171 *Obp56g*, is required for full male fertility and strong induction of the PMR. We further find that  
172 *Obp56g* is expressed in the male ejaculatory bulb, loss of *Obp56g* leads to loss of the mating  
173 plug in the female reproductive tract after mating, and this loss leads to a reduction in the  
174 number of sperm stored in the mated female. Using comparative RNAseq data across  
175 *Drosophila* species, we find *Obp56g* has conserved expression in the head, though expression  
176 in the male reproductive tract only in subset of species, suggesting potential co-option of this  
177 protein for reproductive function over evolutionary time. Finally, we investigate the molecular  
178 evolution of the seminal Obps across a phylogeny of 22 *Drosophila* species. Our results indicate  
179 duplication and pseudogenization have played an important role in the evolution of seminal  
180 Obps, as well as recurrent positive selection acting on a subset of these genes.

181

## 182 **Materials and Methods:**

### 183 Fly stocks and husbandry:

184 Flies were reared and mating assays performed on a 12-hour light/dark cycle on standard  
185 yeast/glucose media in a 25°C temperature-controlled incubator.

186

187 We used the following lines in this study: BL#55079 (*w*[\*]; *TI*{*w*[+*mW.hs*]=*GAL4*}*Obp56g*[1])  
188 (Jeong et al., 2013); *UAS-CD4-tdGFP* (Han et al., 2011); *LHm pBac*{*Ubnls-EGFP*, *ProtB-*  
189 *eGFP*}(3) (a gift from J. Belote and S. Pitnick, Syracuse University) (Manier et al., 2010);  
190 Canton-S (CS) ; *w*1118 ; BL#25678 (*w*[1118]; *Df*(2*R*)*BSC594/CyO*) (Cook et al., 2012);  
191 *w*; *Gla/CyO* ; *w*; ; *TM3/TM6b* ; BL#3704 (*w*[1118]/*Dp*(1;Y)*y*[+]; *CyO/Bl*[1]; *TM2/TM6B*, *Tb*[1]) ; *y*1  
192 *w*1118; *attP2*{*nos-Cas9*}/*TM6C*, *Sb Tb*) (Kondo and Ueda, 2013); BL#51324 (*w*[1118];  
193 *PBac*{*y*[+*mDint2*] *GFP*[*E.3xP3*]=*vas-Cas9*}*VK00027*) ; VDRC#23206 (*UAS-Obp56g*<sup>RNAi</sup> from the  
194 GD library); BL#49409 (*w*[1118]; *P*{*y*[+*t7.7*] *w*[+*mC*]=*GMR64E07-GAL4*}*attP2*) (Jenett et al.,  
195 2012); *C*(1)*DX*, *y*[1] *w*[1] *f*[1]/*FM7c*, *Kr-GAL4*[*DC1*], *UAS-GFP*[*DC5*], *sn*[+];;; (a gift from Susan  
196 Younger, University of California San Francisco); *Tubulin-GAL4* (Findlay et al., 2014);  
197 BL#35569 (*y*[1] *w*[\*] *P*{*y*[+*t7.7*]=*nos-phiC31int.NLS*}*X*; *PBac*{*y*[+]-*attP-9A*}*VK00027*). We  
198 obtained lines of *D. ananassae*, *D. pseudoobscura*, *D. mojavensis*, and *D. virilis* from the  
199 *Drosophila* Species Stock Center at Cornell University.

200

201 To generate males varying in numbers of copies of *Obp56g*, we used a line carrying the  
202 *Obp56g*<sup>1</sup> mutant allele, which is a complete replacement of the *Obp56g* coding sequence with a  
203 *GAL4* mini-*white* cassette (Jeong et al., 2013). We crossed homozygous *Obp56g*<sup>1</sup> flies with  
204 *Df*(2*R*)*BSC594/CyO* to generate trans-heterozygous *Obp56g*<sup>1</sup> over a deficiency of chromosome

205 2R, or *Obp56g*<sup>1</sup> balanced over *CyO* (which have zero and one copy of functional *Obp56g*,  
206 respectively). We then crossed *w*<sup>1118</sup> (the genetic background of the *Obp56g*<sup>1</sup> null line) with  
207 *Df(2R)BSC594/CyO* to obtain *+/Df(2R)* or *+/CyO* males (which have one and two copies of  
208 functional *Obp56g*, respectively).

209  
210 To knock down expression of *Obp56g* in males, we drove a UAS-dsRNA construct against  
211 *Obp56g* (VDRC#23206) using the ubiquitous *Tubulin-GAL4* driver (Lee and Luo, 1999). Control  
212 males were the progeny of UAS-*Obp56g*<sup>RNAi</sup> crossed to *w*<sup>1118</sup>.

213  
214 To knock down expression of *Obp56g* in the male ejaculatory duct and bulb, we drove UAS-  
215 *Obp56g*<sup>RNAi</sup> with a *CrebA-GAL4* enhancer trap driver (Avila et al., 2015; Jenett et al., 2012).  
216 Control males were the progeny of *CrebA-GAL4* crossed to *w*<sup>1118</sup>.

217

#### 218 Construction of gRNA-expressing lines and CRISPR genome editing:

219 To generate individual *Obp* null alleles, we used a co-CRISPR approach to target each *Obp*  
220 gene along with the gene *ebony* as previously described for *Drosophila* (Kane et al., 2017). To  
221 this end, we opted for a strategy in which transgenic multiplexed gRNA expressing lines were  
222 crossed to germline Cas9 expressing lines (see Figure 2—figure supplement 1 for full crossing  
223 scheme).

224

225 To generate our gRNA constructs, we used flyCRISPR's Optimal Target Finder tool to design  
226 three gRNAs per *Obp* gene (two guides targeting the 5' CDS of the gene, the third guide  
227 targeting the 3' end, Table S1) (Gratz et al., 2014). We then integrated these gRNA sequences  
228 (and a gRNA targeting *ebony*) into pAC-U63-tgRNA-Rev, a plasmid that expresses multiplexed  
229 gRNAs under the control of the U6:3 promoter (Table S2 & S3, supplemental methods) (Kane et  
230 al., 2017; Poe et al., 2019). The resulting plasmids were injected into BL#35569 (*y[1] w[\*]*  
231 *P{y[+t7.7]=nos-phiC31int.NLS}X; PBac{y[+]-attP-9A}VK00027*) embryos by Rainbow Transgenic  
232 Flies, and integrated into the third chromosome attP<sup>VK27</sup> site via PhiC31-mediated integration.

233

234 For the autosomal *Obp* SFP genes, each stable transgenic gRNA line was crossed to *yw;;nos-*  
235 *Cas9attP2* flies in the P0 generation, and the resulting P1 progeny were crossed to *w; CyO/Bl;*  
236 *TM2,e/TM6B,e* as in (Kane et al., 2017). Resulting F1 *ebony/TM6B,e* or *ebony/TM2,e* flies were  
237 backcrossed for two generations to *w;Gla/CyO* to isolate mutant *Obp* alleles (and to remove  
238 third chromosome *ebony* mutations). The *Obp* mutant lines were then maintained as a

239 heterozygous stock over *CyO* in a *white*<sup>-</sup> background (see Figure 2—figure supplement 1 for the  
240 detailed crossing scheme). All mutations were validated using PCR and Sanger sequencing  
241 with primers that target ~150 bp upstream and downstream of each *Obp* gene (Table S3, Table  
242 S4).

243  
244 For *Obp8a*, which is X-linked, the crossing scheme was the same as above except that we used  
245 *w<sup>1118</sup>;vasa-Cas9* to avoid introducing *Obp* mutations on a *yellow*<sup>-</sup> chromosome (Figure 2—figure  
246 supplement 1). Additionally, we used an *FM7c* balancer line instead of *w<sup>1118</sup>;Gla/CyO*.

247  
248 For the mating assays, we used homozygous null *Obp* mutants (*Obp<sup>mut</sup>*) and their heterozygous  
249 *Obp<sup>mut</sup>/CyO* siblings as controls. For *Obp8a* mutants, we used unedited males from sibling lines  
250 as controls.

251  
252 Verifying levels of knockdown:  
253 We used RT-PCR to assess the level of expression of *Obp56g* in our experimental and control  
254 knockdown flies. We extracted RNA from whole flies using RNazol, treated the samples with  
255 DNase (Promega), and synthesized cDNA as previously described (Chen et al., 2019), (Sigma-  
256 Aldrich). *Obp56g* was then amplified via RT-PCR, using *Rp132* as a positive control, and dH<sub>2</sub>O  
257 as a negative control. For *Obp56g* RNAi, we removed the heads of the flies prior to extracting  
258 RNA from the rest of the body, which was necessary to increase sensitivity to detect  
259 reproductive tract expression, since *Obp56g* is expressed in the head (Galindo and Smith,  
260 2001; Jeong et al., 2013).

261  
262 Mating assays:  
263 We collected unmated flies under CO<sub>2</sub> anesthesia and aged males and females in separate  
264 vials for 3-5 days post-eclosion. We randomly assigned females to a given male genotype and  
265 observed single pair copulations, after which we removed the male using an aspirator. The  
266 experimenter was then blinded from the genotype of the male for the duration of the experiment.  
267 We discarded any mating pair that copulated for an unusually short duration (<10 minutes) as  
268 previously described (LaFlamme et al., 2012). Each mating assay was performed two  
269 independent times.

270  
271 Mating latency was measured as the time difference between introducing the male into the vial  
272 and the beginning of mating. Mating duration was measured as the time difference between the



273 end of mating and the beginning of mating. Time data were converted to minutes using the R  
274 package *chron* (version 2.3-58), and statistical differences between male genotypes were tested  
275 using Student's T-tests in R (James and Hornik, 2022).

276

277 Mating assays (female egg laying, egg hatchability, and female remating rate) were performed  
278 as previously described (Findlay et al., 2014). We assessed statistical significance for egg  
279 counts using a generalized linear mixed effects model using the *lme4* package (version 1.1-30)  
280 in R version 4.2.1, where male genotype and day were included as fixed effects, and vial was  
281 included as a random effect, as previously described (Bates et al., 2015; Findlay et al., 2014;  
282 LaFlamme et al., 2012). Egg laying was modeled using a Poisson distribution, and the fit of the  
283 full model was compared against a reduced model where male genotype was dropped, using  
284 the R function *aov*. We accounted for false discovery rate by applying a Benjamini-Hochberg  
285 correction (Benjamini and Hochberg, 1995). To assess on which day differences among  
286 genotypes were significant, we performed pairwise comparisons on estimated marginal means  
287 between days and genotypes using the R package *emmeans* (version 1.8.1-1) (Lenth et al.,  
288 2022). Significance in egg hatchability was assessed the same way, except we used a binomial  
289 distribution as previously described (LaFlamme et al., 2012). We assessed statistical  
290 significance for differences in female remating rates between two male genotypes using Fisher's  
291 exact tests, and tests for equality of proportions when comparing across more than two male  
292 genotypes.

293

294 To assess mating plug formation and sperm storage, we crossed a *ProtamineB-eGFP*  
295 transgene (Manier et al., 2010) into the *Obp56g<sup>1</sup>* background to visualize sperm directly. We  
296 observed single pair matings between CS females and either *Obp56g<sup>1</sup>/Obp56g<sup>1</sup>*; *ProtB-eGFP* or  
297 *Obp56g<sup>1</sup>/CyO*; *ProtB-eGFP* males. Females were flash frozen in liquid nitrogen immediately  
298 after the end of mating. We dissected the lower female reproductive tract (including the bursa,  
299 seminal receptacle, and spermathecae) into ice cold PBS, mounted the tissue in a drop of PBS,  
300 and added a coverslip. The tissue was imaged on an ECHO-Revolve microscope using a 10X  
301 objective with a FITC LED light cube to visualize the autofluorescent mating plug, and each  
302 female was scored as having a mating plug present or absent. Statistical significance in mating  
303 plug presence vs. absence was assessed using Fisher's exact tests. Sperm counts using these  
304 male genotypes were performed similarly, with mated CS females flash frozen either 3 hours or  
305 4 days after the start of mating (ASM). To facilitate sperm counting, the SR was unwound using  
306 forceps, and the spermathecal caps were gently crushed under the coverslip to release sperm.

307 Sperm from both spermathecal caps was counted per individual. Statistical significance in  
308 sperm counts was assessed using Student's T-tests in R.

309

310 To assess sperm transfer during mating, we flash froze copulating pairs of CS females and  
311 either *Obp56g<sup>1</sup>/Obp56g<sup>1</sup>; ProtB-eGFP* or *Obp56g<sup>1</sup>/CyO; ProtB-eGFP* males in liquid nitrogen 12  
312 minutes ASM, a time point when efficient transfer of both sperm and seminal fluid components  
313 has finished (Gilchrist and Partridge, 2000; Lung and Wolfner, 2001). Frozen males and females  
314 were gently separated at the genitalia, and the female reproductive tract was dissected and  
315 scored as described above for the presence/absence of the sperm mass and mating plug.

316

### 317 Expression patterns:

318 To determine male expression patterns of *Obp56g* in the reproductive tract, we crossed the  
319 deletion line of *Obp56g* (BL#55079), which is a promoter-trap GAL4 line, to a *UAS-CD4-tdGFP*  
320 line to generate *Obp56g-GAL4 > UAS-CD4-tdGFP* flies (Jeong et al., 2013). Unmated males  
321 were aged 3-5 days, and entire reproductive tracts were dissected into ice cold PBS. The tissue  
322 was mounted in PBS and a coverslip was added. The tissue was imaged using an ECHO-  
323 Revolve microscope as described above, using the FITC light cube to visualize live GFP  
324 fluorescence. The ejaculatory bulb is known to autofluorescence due to the seminal protein  
325 PEB-me (Lung and Wolfner, 2001), so as a negative control we imaged reproductive tracts from  
326 *UAS-CD4-tdGFP* males.

327

328 We tested for expression of the other seminal Obps in different parts of the male reproductive  
329 tract using semi-quantitative RT-PCR on four dissected tissues: testes (with seminal vesicles),  
330 accessory glands, ejaculatory ducts, and ejaculatory bulbs. We dissected each tissue from ~30  
331 3–5-day old Canton-S males directly into RNazol, and prepared cDNA as described above. As  
332 a positive control for each tissue, we amplified *Actin5C*. As a negative control, we prepared  
333 RNA samples for each tissue that were not treated with reverse transcriptase. Additionally, we  
334 analyzed previously published single nucleus RNAseq data from the Fly Cell Atlas, using scripts  
335 from (Raz et al., 2022) to load the loom file, scale, and normalize the expression data from the  
336 stringent 10X male reproductive gland sample using Seurat (version 4.2.0), SeuratDisk (version  
337 0.0.0.9020), and ScopeLoomR (version 0.13.0) in R (Hoffman, 2022; Li et al., 2022; Satija et al.,  
338 2015).

339

340 To examine *Obp* expression patterns across species, we used publicly available RNAseq data  
341 from dissected tissues and whole bodies for the following species of *Drosophila*: *melanogaster*,  
342 *yakuba*, *ananassae*, *pseudoobscura*, *persimilis*, *willistoni*, *virilis*, and *mojavensis* (Yang et al.,  
343 2018). Gene level read counts were obtained from this study (GSE99574) based on HiSAT2  
344 alignments to the FlyBase 2017\_03 annotation. Counts were then normalized within species for  
345 genes with at least one read across all samples in DEseq2 with a median ratio method, then  
346 log2 normalized with an added count of 1.

347  
348 To verify the expression patterns seen in the RNAseq dataset, and to determine which tissue of  
349 the reproductive tract was responsible for expression, we performed semi-quantitative RT-PCR  
350 for *Obp56g* from dissected heads, accessory glands, ejaculatory bulbs, and carcasses from  
351 males of *Drosophila* species: *melanogaster*, *ananassae*, *pseudoobscura*, *virilis*, and *mojavensis*.  
352 For each species, we reared flies and separated males and females under CO<sub>2</sub> anesthesia and  
353 aged the males to sexual maturity (Ahmed-Braimah et al., 2017; Karr et al., 2019; Kelleher et  
354 al., 2009; Tsuda et al., 2015). We dissected tissues from ~25 males directly into RNazol, and  
355 prepared cDNA as described above. We designed species-specific primers for *Obp56g* (Table  
356 S3) and used *Actin5C* and dH<sub>2</sub>O controls.

357

#### 358 Western blotting:

359 To assess the production and transfer of specific seminal proteins, we performed Western  
360 blotting on protein extracts from CS females that were mated to either experimental  
361 *Obp56g<sup>1</sup>/Df(2R)* or control *Obp56g<sup>1</sup>/CyO* males and flash frozen in liquid nitrogen 35 minutes  
362 ASM. For each genotype, we dissected the reproductive tracts from 1 male and 4 mated CS  
363 females and performed Western blotting using antibodies against Sex Peptide (SP), CG1656,  
364 CG1652, Antares (Antr), CG9997, CG17575, Acp36DE, Ovulin (Acp26Aa), and tubulin as a  
365 loading control as previously described (Misra and Wolfner, 2020). Protein extracts were  
366 separated on a 12% acrylamide gel, transferred to PVDF membranes, and probed for each  
367 seminal protein. Antibodies were used at the following concentrations: Acp26Aa (1:5000),  
368 Acp36DE (1:12,000), Antr (1:750), CG9997 (1:750), SP (1:1,000), CG1652 (1:250), CG1656  
369 (1:500), CG17575 (1:500), Tubulin (1:4,000, Sigma-Aldrich T5168) (LaFlamme et al., 2012;  
370 Ravi Ram and Wolfner, 2009; Singh et al., 2018).

371

#### 372 Evolutionary analysis:

373 We obtained orthologous coding sequences for each of the seminal Obps from the following 22  
374 *Drosophila* species from NCBI: *melanogaster*, *simulans*, *sechellia*, *erecta*, *yakuba*, *ananassae*,  
375 *eugracilis*, *suzukii*, *biarmipies*, *takahashii*, *elegans*, *rhopaloa*, *ficuspshila*, *kikawaii*, *biplectinata*,  
376 *miranda*, *pseudoobscura*, *persimilis*, *virilis*, *willistoni*, *mojavensis*, and *grimshawi*. To do so, we  
377 used gene ortholog predictions from the *Drosophila* evolutionary rate covariation ortholog  
378 dataset, which was generated using the OrthoFinder2 algorithm (Findlay et al., 2014; Raza et  
379 al., 2019). To bolster our ortholog predictions, we performed reciprocal best tBLASTn searches  
380 in each of the genomes using the focal *D. melanogaster* *Obp* gene as the query, retaining only  
381 those genes that were reciprocal best hits for study (this filtered ~24% of the predicted  
382 orthologs, which were frequently evolutionarily older paralogs from the same genomic cluster).  
383 For orthologous gene groups with predicted paralogs, we identified the syntenic region in the  
384 target genome by finding orthologs of the flanking genes, assuming conservation of gene order.  
385 Additionally, we used RAxML-NG to construct maximum-likelihood phylogenies from the  
386 predicted coding sequences to further validate orthology calls for genes with predicted paralogs  
387 (Kozlov et al., 2019). Using this syntenic approach, we identified instances where some genes  
388 were unannotated by the NCBI Gnomon pipeline. In these situations, we ensured the  
389 unannotated genes we retained for our evolutionary analysis had intact open reading frames,  
390 splice sites, and lacked premature stop codons. We additionally used InterProScan to ensure  
391 these genes had a predicted Obp protein domain (Jones et al., 2014).

392

393 We used MUSCLE implemented in MEGA-11 with default settings to align the amino acid  
394 sequences, and back-translated the alignment obtain the cDNA alignment (Edgar, 2004;  
395 Tamura et al., 2021). We constructed a consensus phylogeny based on a concatenated  
396 nucleotide alignment of the *Obp* genes using RAxML-NG, where gaps were used when a  
397 particular protein was missing from a species as previously described (Kozlov et al., 2019;  
398 McGeary and Findlay, 2020). *Obp51a* was excluded from this concatenated tree due to  
399 extensive tandem gene duplication. In RAxML-NG, we used the GTR+Gamma models and  
400 performed non-parametric bootstrapping with 1,000 replicates (Kozlov et al., 2019). We used  
401 the Transfer Bootstrap Expectation (TBE) as a branch support metric as previously described  
402 (Carlisle et al., 2022). We used the top scoring tree topology from RAxML-NG for all analyses  
403 run in PAML for genes predicted to be single copy across the *melanogaster* group. For genes  
404 with duplications in the *melanogaster* group (*Obp22a* and *Obp51a*), we also constructed gene  
405 trees using RAxML-NG, and used those phylogenies in PAML.

406

407 For our evolutionary analyses, we used the codeml package in PAML to run branch and sites  
408 tests (Edgar, 2004; Kumar et al., 2018; Yang, 2007). For the branch test, we used the  
409 consensus phylogeny for all 22 species and compared the likelihood ratio of the “free ratio”  
410 model with the M0 model. For the sites tests, we limited species in the analysis to those in the  
411 *melanogaster* group to avoid saturation of synonymous sites. For these analyses, we used  
412 likelihood ratio tests to compare the M7 with the M8 model. For those genes which showed  
413 evidence of positive selection in the M7 vs. M8 comparison, we then performed likelihood ratio  
414 tests between models M8 and M8a. For genes in which the M8 model was a significantly better  
415 fit, we then used the Bayes empirical Bayes (BEB) predictions to identify specific sites under  
416 positive selection. For any genes with significant evidence of positive selection, we detected  
417 recombination breakpoints in the *Obp* genes using GARD implemented in DataMonkey,  
418 partitioned the genes at the breakpoints and re-ran PAML on each segment separately as  
419 previously described (Kosakovsky Pond et al., 2006; McGeary and Findlay, 2020).

420

#### 421 Materials availability statement:

422 All new CRISPR mutants and gRNA lines generated for this study are available upon request.

423

#### 424 Results:

##### 425 *Obp56g* is required for fecundity and regulates remating rates of mated females

426 To test the role of the seminal Obps in the long-term post-mating response, we used a co-  
427 CRISPR approach to generate individual null alleles in the following genes: *Obp56f*, *Obp56i*,  
428 *Obp56e*, *Obp51a*, *Obp22a*, and *Obp8a* (Table S4). Additionally, we used existing mutant and  
429 RNAi lines to perturb *Obp56g* (Jeong et al., 2013). Collectively, we used males of these mutant  
430 and RNAi lines to measure the effect of Obp perturbation on egg laying and remating rates of  
431 their female mates. Of the seven seminal Obps, only females mated to hemizygous  
432 *Obp56g<sup>1</sup>/Df(2R)* mutant males laid significantly fewer eggs and were significantly more likely to  
433 remate, indicating a loss of the post-mating response (Figures 1B, C & Figure 2 A, B, Figure 1—  
434 figure supplement 1). This phenotype was fully recessive, as heterozygous *Obp56g* mutant  
435 males (*Obp56g<sup>1</sup>/CyO* or *Df(2R)/+*) were not significantly different from wildtype (*+/CyO*) males  
436 (Figure 1B). We did observe slight changes in egg hatchability, though we note that the fraction  
437 of females mated to *Df(2R)/Obp56g<sup>1</sup>* males that laid eggs to measure hatchability from is small  
438 (Figure 2—figure supplement 2A). None of the other CRISPR mutant lines had a significant  
439 effect on egg hatchability, aside from a significant decrease in hatchability in the *Obp8a<sup>WT</sup>* line  
440 (Figure 2—figure supplement 2B). We observed a small difference in egg numbers and

441 remating rates between *Obp8a*<sup>WT</sup> and *Obp8a*<sup>A390</sup> lines, but these differences were not consistent  
 442 across replicates (Figure 2A, B & Figure 1—figure supplement 1C, Table S5)

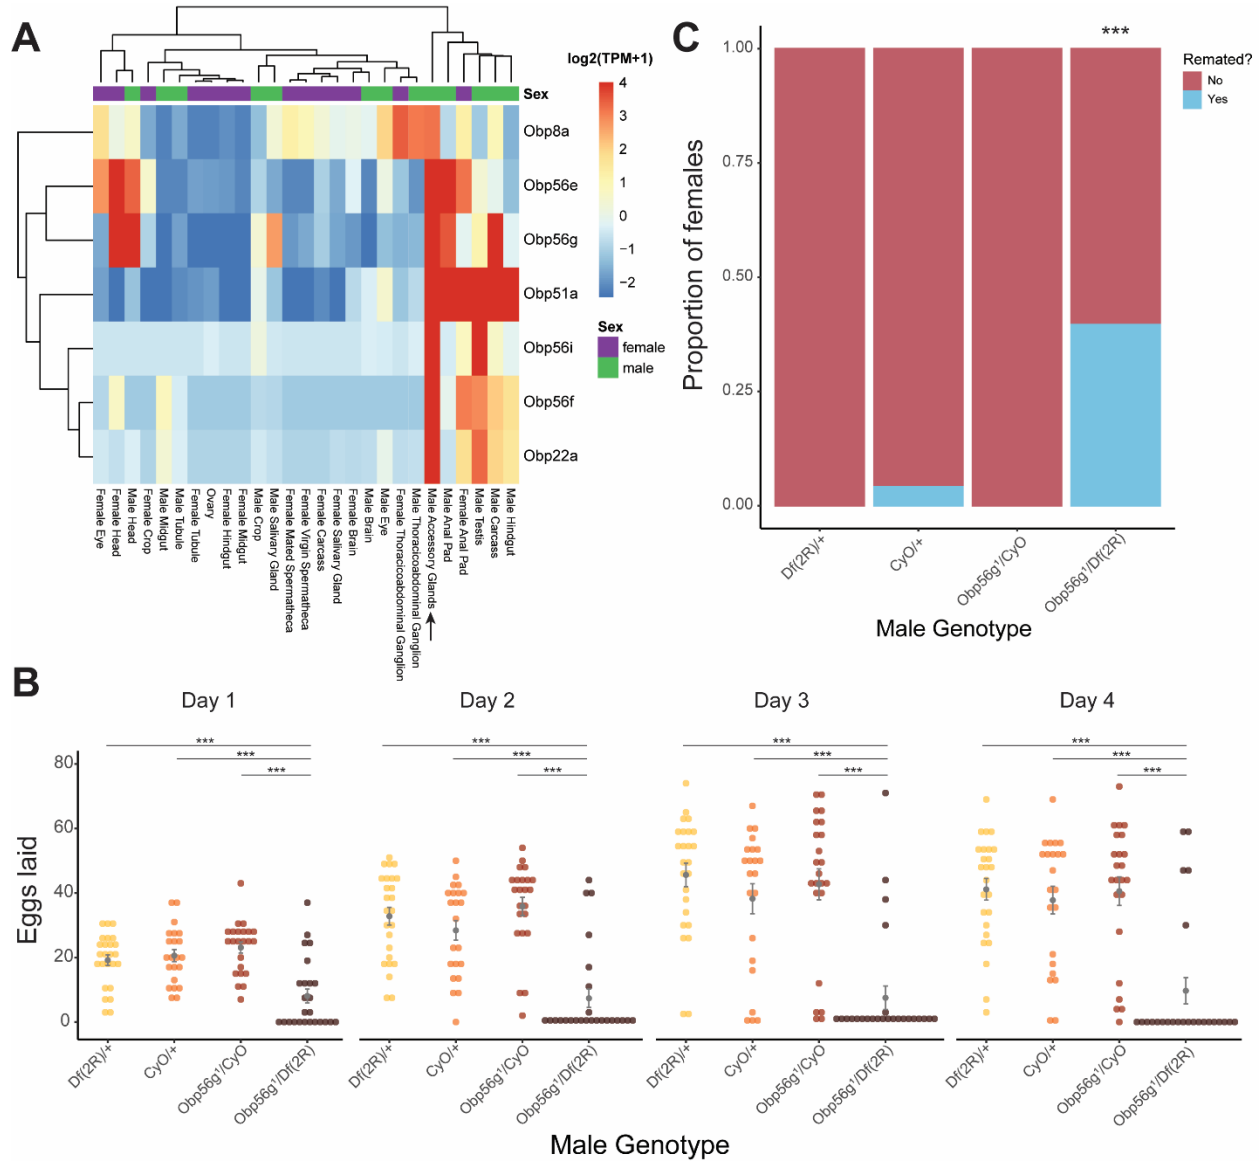

443  
 444 **Figure 1:** Seminal *Obp* gene expression and fecundity/remating defects in females mated to  
 445 *Obp56g<sup>1</sup>* null males. A) Median-centered log<sub>2</sub> normalized TPM values for the seven seminal  
 446 *Obp* genes in adult tissues from FlyAtlas2.0 bulk RNAseq data. Arrow points to male accessory  
 447 gland sample. B) Egg counts from CS females mated to *Df(2R)/+*, *CyO/+* *Obp56g<sup>1</sup>/CyO*, or  
 448 *Obp56g<sup>1</sup>/Df(2R)* males from 1-4 days after mating. Significance indicated from pairwise  
 449 comparisons of male genotypes within days using emmeans on a Poisson linear mixed effects  
 450 model. Error bars represent mean +/- SEM. C) Proportion of females who did or did not remate  
 451 with a standard CS male on the fourth day after mating. Significance indicated from tests of  
 452 equality of proportions. For B and C, n=22-25. Significance levels: \*P<0.05, \*\*P<0.01,  
 453 \*\*\*P<0.001, n.s. not significant. One representative biological replicate is shown, but both  
 454 replicates were significant in the same direction (Figure 1—figure supplement 1A & C).  
 455

456 Figure 1—source data 1: Remating counts and percentages for data shown in Figure 1C.

457

458 We tested whether decreased mating duration could account for the decrease in fecundity in  
 459 females mated to *Obp56g*<sup>1</sup> mutant males and found no significant difference among the four  
 460 genotypes tested (Figure 2—figure supplement 3B). Ubiquitous RNAi knockdown of *Obp56g* in  
 461 males using a *Tubulin*-GAL4 driver recapitulated the phenotype of the hemizygous  
 462 (*Obp56g*<sup>1</sup>/*Df(2R)*) mutant, resulting in decreased female egg laying and increased remating  
 463 rates (Figure 1—figure supplement 2).

464

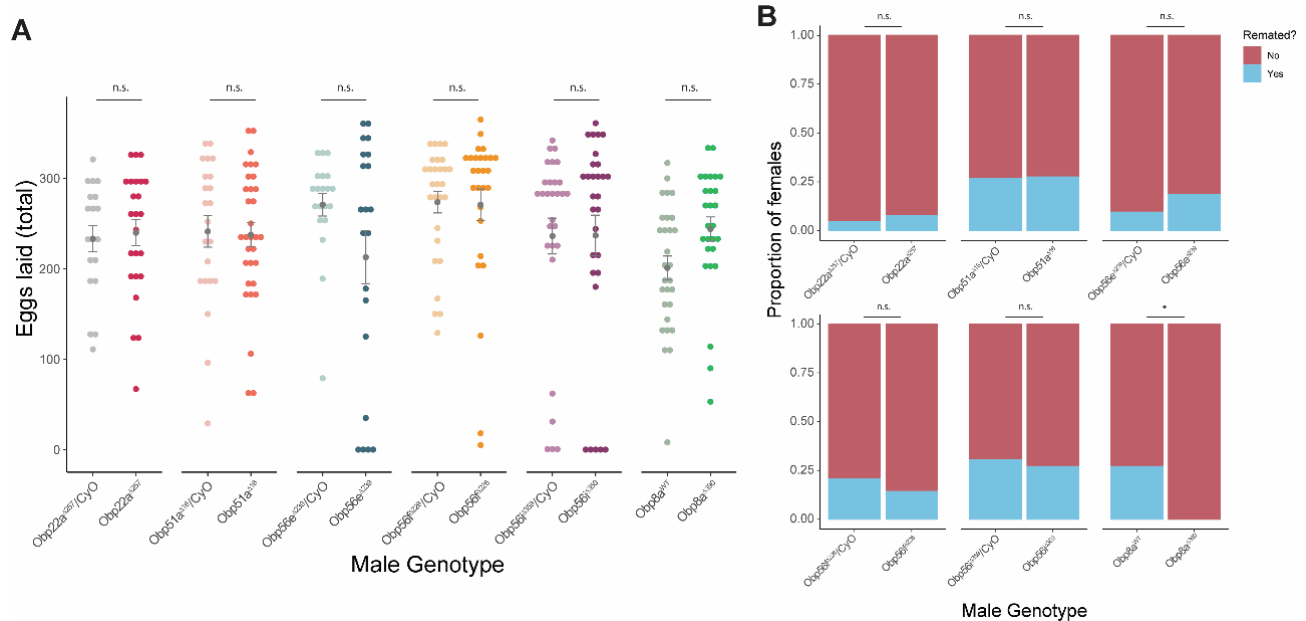

465

466 **Figure 2:** CRISPR/Cas9-generated mutants of *Obp22a*, *Obp51a*, *Obp56e*, *Obp56f*, *Obp56i*,  
 467 and *Obp8a* have no or marginal effects on female fecundity and remating rates. A) Egg counts  
 468 from CS females mated to homozygous null or heterozygous control males (except for *Obp8a*,  
 469 the control of which is from an unedited sibling line) from 1-4 days after mating. Significance  
 470 indicated from Poisson linear models with Benjamini-Hochberg corrections for multiple  
 471 comparisons. Error bars represent mean +/- SEM. B) Proportion of females who did or did not  
 472 remate with a standard CS male on the fourth day after mating. Significance indicated from  
 473 Fisher's exact tests with Benjamini-Hochberg correction. Significance levels: \**P*<0.05, \*\**P*<0.01,  
 474 \*\*\**P*<0.001, n.s. not significant. For A and B, n=19-32. One representative biological replicate is  
 475 shown (data from additional replicates can be found in Figure 1—figure supplement 1C, Table  
 476 S5).

477

478 Figure 2—source data 1: Remating counts and percentages for data shown in Figure 2B.

479

480 Shorter et al. (2016) reported that male-specific knockdown of *Obp56h*, a paralogous *Obp* gene  
 481 in the same genomic cluster as *Obp56e*, *Obp56f*, *Obp56g*, and *Obp56i*, shortened mating  
 482 latency times; KD males were faster to mate than control males. RNAseq expression data from

483 the FlyAtlas2.0 database shows that some of the seminal Obps are co-expressed in other  
484 tissues outside of the male reproductive tract, including head tissues (Figure 1A), so we tested  
485 whether our mutant lines showed altered mating latency or duration. We did not find any  
486 significant differences in either mating latency or duration in any of our mutant lines, aside from  
487 a small but statistically significant decrease in mating duration in *Obp8a<sup>WT</sup>* flies (Figure 2—figure  
488 supplement 3).

489

#### 490 *Obp56g* is expressed in the *D. melanogaster* male ejaculatory bulb

491 While the RNAseq data shown in Figure 1A suggested that *Obp56g* is expressed in the male  
492 AG, Findlay et al. (2008) reported that when females are mated to DTA-E males, which are  
493 spermless and do not produce main cell accessory gland-derived SFPs (Kalb et al., 1993),  
494 transfer of all seminal Obps is lost except for *Obp56g*. These proteomic data suggest that  
495 *Obp56g* is derived from another (or an additional) tissue within the male reproductive tract. To  
496 determine where *Obp56g* is expressed in the male reproductive tract, we crossed the *Obp56g<sup>1</sup>*  
497 mutant line to *UAS-CD4-tdGFP*. We replicated previously published expression patterns for  
498 *Obp56g* in the labellum of the proboscis (Figure 3—figure supplement 1), indicating that the  
499 promoter-trap GAL4 transgene should recapitulate the true expression patterns of endogenous  
500 *Obp56g* (Galindo and Smith, 2001). When we dissected and imaged male reproductive tracts  
501 from *Obp56g-GAL4>UAS-CD4-tdGFP* males, we observed strong GFP signal in the ejaculatory  
502 bulb epithelium (Figure 3A). The ejaculatory bulb-derived seminal protein PEB-me (also known  
503 as *Ebp*) is known to autofluoresce, resulting in autofluorescence of the tissue itself, but the GFP  
504 signal we observed in *Obp56g-GAL4>UAS-CD4-tdGFP* males is much stronger than *UAS-CD4-*  
505 *tdGFP* control males (Figure 3B) (Cohen and Wolfner, 2018).

506

507

508



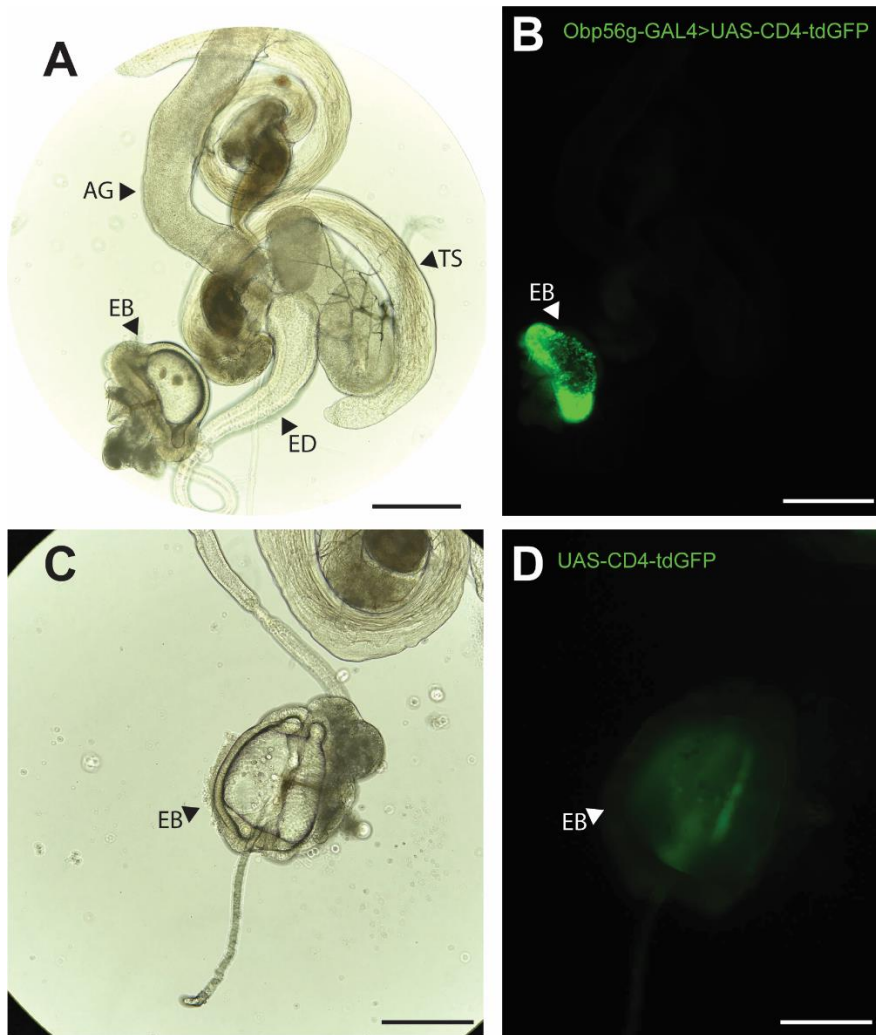

509

510 **Figure 3:** *Obp56g* is expressed in the *Drosophila* male ejaculatory bulb of the reproductive tract.  
511 A) Brightfield and B) GFP fluorescent microscopy image of a reproductive tract dissected from a  
512 *Obp56g-GAL4>UAS-CD4-tdGFP* male, where the following tissues are labeled: AG, accessory  
513 gland. TS, testes. ED, ejaculatory duct. EB, ejaculatory bulb. C) Brightfield and D) GFP  
514 fluorescent microscopy images from *UAS-CD4-tdGFP* control males, showing only the EB  
515 portion of the tract. Scale bars in A&B=130  $\mu$ m, C&D=70 $\mu$ m.  
516

517 To determine expression patterns for the other seminal Obps, we performed semi-quantitative  
518 RT-PCR on dissected testes, accessory gland, ejaculatory duct, and ejaculatory bulb tissues  
519 from CS males. Using this approach, we confirmed that *Obp56g* is highly expressed in the  
520 ejaculatory bulb, though we also detected expression in the ejaculatory duct and male  
521 accessory glands. We observed that the six other *Obp* genes are highly and primarily expressed  
522 in the accessory gland and ejaculatory duct (Figure 3—figure supplement 2). We further  
523 confirmed these expression patterns in the Fly Cell Atlas scRNAseq data of male reproductive  
524 tract tissues (Figure 3—figure supplement 2) (Li et al., 2022).

525

526 *Obp56g* is involved in mating plug formation, ejaculate retention, and sperm storage

527 Increased egg laying and decreased remating are two phenotypes of the post-mating response  
528 that depend on the presence of sperm and SP within the female sperm storage organs  
529 (Manning, 1967; Peng et al., 2005). Given that *Obp56g* is expressed in the ejaculatory bulb, and  
530 the loss of the post-mating response in *Obp56g* mutant and knockdown males (Figure 1), we  
531 wondered whether this loss of fertility could be due to defects in mating plug formation or sperm  
532 storage. In order to test this, we crossed a *ProtamineB*-eGFP transgene (Manier et al., 2010),  
533 which marks the heads of sperm with GFP, into the *Obp56g<sup>1</sup>* mutant line, mated null and control  
534 males to females, and directly counted sperm in the female sperm storage organs at 3 hours  
535 and 4 days ASM. We also used the autofluorescent nature of PEB-me to score the presence of  
536 the mating plug in the female bursa immediately after mating (Lung et al., 2001; Ludwig et al.,  
537 1999).

538

539 In contrast to *Obp56g<sup>1</sup>/CyO*; *ProtB-eGFP* control males, which form a fully coagulated mating  
540 plug in the female's bursa, we observed homozygous *Obp56g<sup>1</sup>/Obp56g<sup>1</sup>*; *ProtB-eGFP* mutant  
541 males form much less prominent and non-coagulated mating plugs (Figure 4A & 4B). While the  
542 majority of females mated to control males form a mating plug, none of the females mated to  
543 *Obp56g<sup>1</sup>/Obp56g<sup>1</sup>*; *ProtB-eGFP* males had a fully formed mating plug immediately after the end  
544 of mating (Figure 4C). Additionally, at this time point, a subset of females mated to  
545 *Obp56g<sup>1</sup>/Obp56g<sup>1</sup>*; *ProtB-eGFP* males lacked a sperm mass and had very few or no sperm in  
546 their bursa (Figure 4C). To test the possibility that *Obp56g* mutant males have defective sperm  
547 transfer, we dissected reproductive tracts from females flash frozen while the flies were still  
548 copulating, 12 minutes ASM. In *D. melanogaster*, transfer of mating plug components, SFPs,  
549 and sperm begins at 3-5, 3, and 7 minutes, respectively, and is completed by 10 minutes ASM  
550 (Gilchrist and Partridge, 2000; Lung and Wolfner, 2001). At this time point, we noted the  
551 presence of sperm in the bursa of all females mated to both *Obp56g<sup>1</sup>/Obp56g<sup>1</sup>*; *ProtB-eGFP*  
552 and *Obp56g<sup>1</sup>/CyO*; *ProtB-eGFP* males, suggesting the lack of sperm masses immediately after  
553 mating is not related to sperm transfer (Figure 4—figure supplement 1). Rather, all females  
554 mated to *Obp56g<sup>1</sup>/Obp56g<sup>1</sup>*; *ProtB-eGFP* males lacked proper mating plugs at this time point,  
555 suggesting loss of the sperm mass is related to issues with ejaculate retention (Figure 4—figure  
556 supplement 1). Mutations in the other *Obp* genes had no effect on mating plug formation (Table  
557 S6).

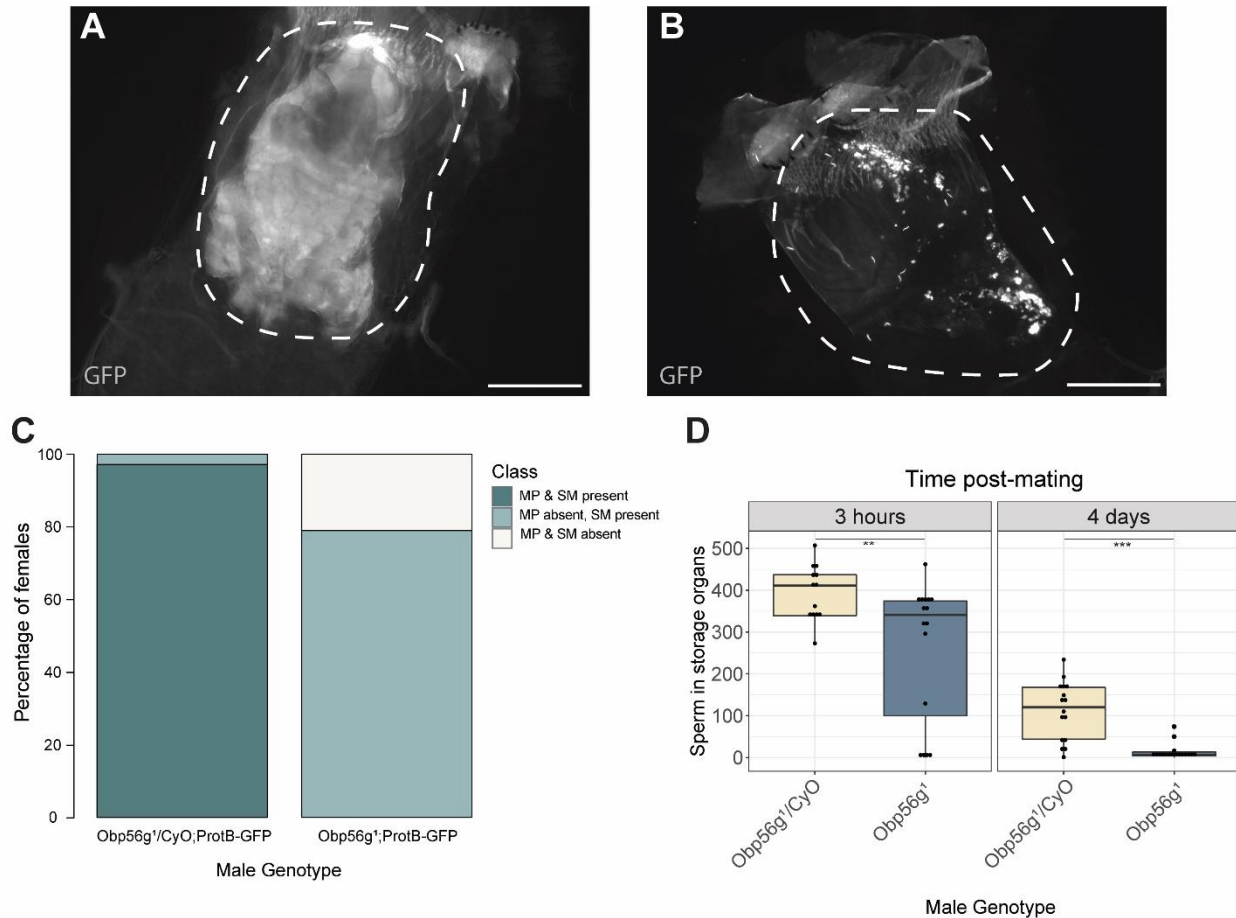

558

559 **Figure 4:** Females mated to *Obp56g<sup>1</sup>* null males have defects in mating plug formation and  
 560 sperm storage after mating. A) Fluorescent GFP microscopy image of the bursa of a CS female  
 561 mated to a *Obp56g<sup>1</sup>/CyO;ProtB-eGFP* control male, with the mating plug surrounded by a  
 562 dotted white line. Females were frozen in liquid nitrogen immediately after the end of mating.  
 563 The mating plug is autofluorescent. B) Fluorescent GFP microscopy image of the bursa of a CS  
 564 female mated to a *Obp56g<sup>1</sup>;ProtB-eGFP* mutant male, where a similar region in the bursa as A)  
 565 is shown in the dotted white line. C) Proportion of females mated to *Obp56g<sup>1</sup>/CyO;ProtB-eGFP*  
 566 control or *Obp56g<sup>1</sup>;ProtB-eGFP* mutant males who had mating plugs or sperm masses present  
 567 or absent immediately after the end of mating (n=35-38). MP, mating plug. SM, sperm mass. D)  
 568 Box plots of sperm counts in the storage organs of CS females mated to control  
 569 (*Obp56g<sup>1</sup>/CyO;ProtB-eGFP*) or mutant (*Obp56g<sup>1</sup>;ProtB-eGFP*) males at 3 hours or 4 days post-  
 570 mating. n=13-17 for each group. Significance indicated from Student's t-tests. Significance  
 571 levels: \*P<0.05, \*\*P<0.01, \*\*\*P<0.001, n.s. not significant. Scale bar=130um.  
 572

573 Figure 4—source data 1: Counts and proportions for data shown in Figure 4C.

574

575 Previous studies of *D. melanogaster* mating plug proteins Acp36DE and PEB-me reported a  
 576 reduction in sperm storage when these genes were mutated or knocked down, indicating that  
 577 integrity of the mating plug is essential for effective sperm storage (Avila et al., 2015; Avila and  
 578 Wolfner, 2009; Bertram et al., 1996; Neubaum and Wolfner, 1999). At 3 hours and 4 days ASM,

579 we observed females mated to *Obp56g<sup>1</sup>/Obp56g<sup>1</sup>*; *ProtB-eGFP* males have significantly fewer  
580 sperm in their sperm storage organs than females mated to *Obp56g<sup>1</sup>/CyO*; *ProtB-eGFP* males,  
581 (3 hours mean sperm number *Obp56g<sup>1</sup>/CyO*: 393, mean sperm number *Obp56g<sup>1</sup>*: 258  $p < 0.01$ ; 4  
582 day mean sperm number *Obp56g<sup>1</sup>/CyO*: 112, mean sperm number *Obp56g<sup>1</sup>*: 13,  $p < 0.001$   
583 Figure 4D). These results suggest that the reduction in fecundity we observed in our mating  
584 assays is due to issues with sperm retention and subsequent long-term storage in *Obp56g<sup>1</sup>*  
585 mutant males.

586

587 We further tested whether male reproductive tract expression of *Obp56g* is required for fertility  
588 and mating plug formation by knocking down *Obp56g* using a *CrebA-GAL4* enhancer-trap  
589 driver, which drives expression in the ejaculatory duct and bulb (Avila et al., 2015). We  
590 observed that mates of knockdown males showed significantly reduced egg laying and  
591 increased remating rates compared to control males, similar to whole body *Obp56g* knockdown  
592 and the *Obp56g<sup>1</sup>* mutant line (Figure 1—figure supplement 3A & C). Additionally, experimental  
593 knockdown males had decreased incidence of mating plug formation compared to control males  
594 (Figure 1—figure supplement 3B). We also observed instances of ejaculate loss from the bursa  
595 of the female after the flies uncoupled, similar to the phenotype previously observed for *PEB-me*  
596 knockdown (Figure 1—figure supplement 3D) (Avila et al., 2015). Together, these findings show  
597 that ejaculatory duct/bulb expression of *Obp56g* is required for mating plug formation, sperm  
598 storage, and the post-mating response.

599

600 We next tested the possibility that *Obp56g* may act as a molecular carrier for seminal proteins  
601 that promote mating plug formation or the establishment of the post-mating response, such as  
602 Sex Peptide. In order to test whether loss of *Obp56g* leads to a loss of particular SFPs in the  
603 female reproductive tract after mating, we performed Western blotting on dissected female  
604 bursae samples 35 minutes ASM and probed for several SFPs known to be important either for  
605 the long term post-mating response or mating plug formation (Avila and Wolfner, 2009; Findlay  
606 et al., 2014). We observed no difference in the synthesis of any tested protein in the male  
607 reproductive tract between *Obp56g<sup>1</sup>/Df(2R)* and *Obp56g<sup>1</sup>/CyO* males (Figure 4—figure  
608 supplement 2, lanes 2 & 3). Rather, we observed a lower signal intensity relative to controls in  
609 the bursa of females mated to *Obp56g<sup>1</sup>/Df(2R)* males for CG1652, CG9997, Ovulin, and  
610 *Acp36DE* (and its cleavage products) at 35 minutes ASM, consistent with a defect in ejaculate  
611 retention in the mutant condition (Figure 4—figure supplement 2, lanes 4 & 5). In no case did we  
612 observe complete loss of any single protein in females mated to *Obp56g<sup>1</sup>/Df(2R)* males,

613 suggesting that *Obp56g* likely does not act as the sole or an exclusive carrier for these specific  
614 proteins in the seminal fluid.

615

616 Seminal Obps have complex evolutionary histories and exhibit evolutionary rate heterogeneity  
617 across the *Drosophila* genus

618 Previous studies have reported elevated rates of divergence and gene turnover of a subset of  
619 SFP genes across *Drosophila* (Ahmed-Braimah et al., 2017; Begun et al., 2006; Begun and  
620 Lindfors, 2005; Findlay et al., 2008; Mueller et al., 2005; Patlar et al., 2021; Swanson et al.,  
621 2001; Wagstaff and Begun, 2005). To examine the evolutionary history of the seminal *Obp*  
622 genes, we first identified orthologs of these genes across 22 sequenced species. Combining our  
623 orthologous gene predictions with syntenic analysis within each genome allowed us to identify  
624 several instances of lineage-specific tandem duplication and loss (Figure 5A, Figure 5—figure  
625 supplements 1-6). For example, *Obp8a* and *Obp56e* are single copy and found in most  
626 genomes across the genus, with a few predicted losses (Figure 5A, Figure 5—figure  
627 supplement 2&4). *Obp56f* and *Obp56i* are also single copy, though restricted to species of the  
628 *melanogaster* group (Figure 5A, Figure 5—figure supplement 4&6). *Obp22a* is also only found  
629 in *melanogaster* group species and has tandemly duplicated in *D. rhopaloa* and *D. takahashii*  
630 (Figure 5—figure supplement 3). *Obp56g* is found in all species across the genus that we  
631 examined, and has duplicated several times in the *D. willistoni* lineage to generate four copies  
632 (Figure 5A, Figure 5—figure supplement 5). Additionally, in the *obscura* group (*D. miranda*, *D.*  
633 *pseudoobscura*, and *D. persimilis*), there appears to be an intronless and highly diverged copy  
634 of *Obp56g* located immediately adjacent to the conserved gene, possibly the result of a  
635 retroduplication. *D. miranda* additionally has a putative Y-linked copy of *Obp56g* which shares  
636 96% amino acid identity with the autosomal copy. *Obp51a*, which is only found in *melanogaster*  
637 group species, has the most extreme lability in copy number, ranging from 0 copies to 12  
638 tandem copies in *D. eugracilis* (Figure 5—figure supplement 1). We also found evidence of  
639 pseudogenization events in the *Obp22a* and *Obp51a* regions in 5 species, which is consistent  
640 with a recent study that found evidence of pseudogenization of *Obp51a* in *repleta* group species  
641 (Rondón et al., 2022).

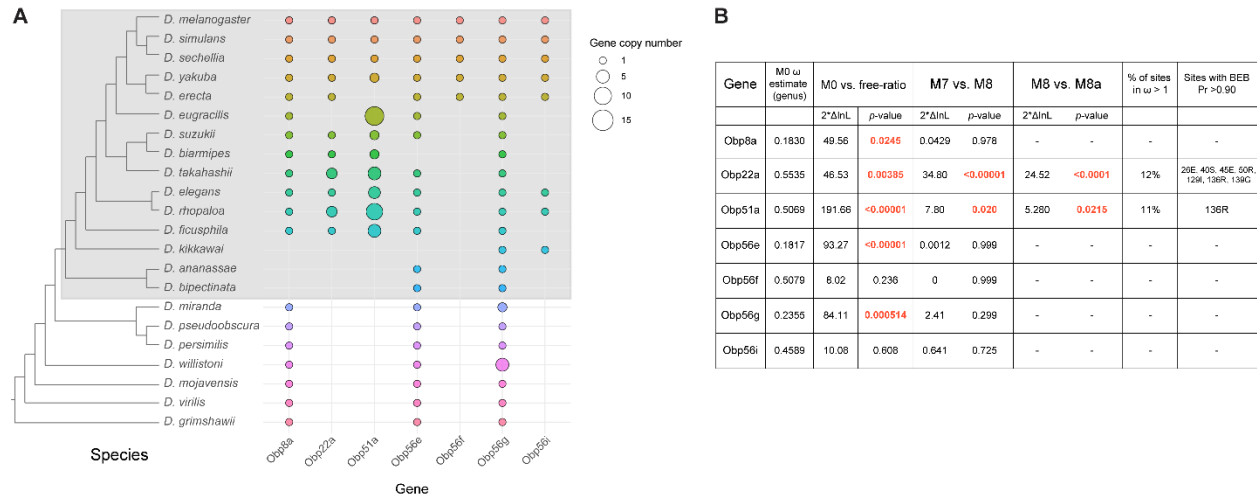

642

643 **Figure 5:** Dynamic changes in copy number, presence/absence, and evolutionary divergence  
644 rates of seminal *Obp* genes across the *Drosophila* genus. A) Inferred copy number of seminal  
645 *Obp* genes across *Drosophila*. Species without a dot represent an inferred loss based on  
646 syntenic analysis. Increased size of the dot represents increased gene copy number. Phylogeny  
647 on the left from (McGeary and Findlay, 2020). Grey box surrounds species of the *melanogaster*  
648 group. B) PAML results for the seminal *Obp* genes from analysis spanning the *Drosophila*  
649 genus (M0 ω estimate, M0 vs. free ratio test) or spanning the *melanogaster* group (M7 vs. M8,  
650 M8 vs. M8a tests). Bold and red text indicates statistically significant comparisons. Amino acid  
651 residues with >0.90 probability of being under positive selection are indicated, with the  
652 number/letter indicative of the *D. melanogaster* position within the alignment.  
653

654 Our syntenic approach also revealed complex evolutionary events for seminal *Obp* genes not  
655 found in *D. melanogaster*. *Acp223*, a predicted *Obp*-like SFP gene with evidence of accessory  
656 gland expression in *D. yakuba* and *D. erecta*, resides between *Obp56e* and *Obp56f* (Begun et  
657 al., 2006). InterProScan searches of this gene match signal peptide and *Obp* protein domains,  
658 and together with the location in the genome, suggest this gene is an *Obp56* cluster paralog  
659 (Begun et al., 2006). Consistent with previous reports of this gene not being present in the *D.*  
660 *melanogaster* genome, we were unable to find hits of this gene in *D. melanogaster* or *D.*  
661 *simulans* genomes using liberal E-value cutoffs in tBLASTn searches, though we found a very  
662 diverged noncoding hit in the annotated 3' UTR of *Obp56e* in *D. sechellia* (Begun et al., 2006).  
663 Begun et al. (2006) reported finding a partial, noncoding orthologous region in *D. melanogaster*,  
664 which we also found in *D. simulans* to be noncoding. We did find orthologs of this gene in other  
665 *melanogaster* group species, which showed relatively long branch lengths in phylogenies of all  
666 *Obp56* cluster genes (Figure 5—figure supplement 7A). In the *Obp51a* cluster, we found  
667 previously reported SFPs *Sfp51D* (in *D. simulans*) and *Acp157a* (in *D. yakuba*) ~14 kb upstream  
668 of *Obp51a*, which are putative orthologs of each other based on moderate branch support in our  
669 phylogenies (Figure 5—figure supplement 7B) (Begun et al., 2006; Findlay et al., 2009).

670 Consistent with previous results, we were unable to find orthologs of this gene in *D.*  
671 *melanogaster* but found a likely pseudogene in *D. simulans*. Previous work also showed this  
672 gene independently duplicated and pseudogenized in *D. yakuba* (Begun et al., 2006). Together,  
673 these results illustrate evolutionary lability in presence/absence and copy number of these  
674 genes in closely related *Drosophila* species.

675  
676 Using our high confidence ortholog candidates, we next examined the molecular evolution of  
677 these genes across *Drosophila*. Previous reports of *Obp* gene family evolution across  
678 *Drosophila* reported heterogenous evolutionary rates for some *Obp* genes across species, but  
679 genes without 1:1 orthologs in all 12 *Drosophila* species were excluded from these previous  
680 analyses, which included *Obp51a*, *Obp22a*, *Obp56i*, and *Obp8a* (Vieira et al., 2007). We began  
681 by using model M0 of PAML to estimate whole-gene ratios of dN/dS ( $\omega$ ) across all species of  
682 the phylogeny. Using this approach, we found three *Obp* genes with  $\omega$  values around ~0.20  
683 (*Obp56g*, *Obp8a*, and *Obp56e*, which are found in species beyond the *melanogaster* group,  
684 Figure 5B). Interestingly, the four *Obp* genes restricted to the *melanogaster* group had higher  $\omega$   
685 values, around ~0.50 (*Obp51a*, *Obp56f*, *Obp56i*, *Obp22a*, Figure 5B) which is much higher than  
686 the reported genome-wide average in *D. melanogaster* (Chang and Malik, 2022; Drosophila 12  
687 Genomes Consortium et al., 2007). We then used the “free-ratio” model of PAML to test  
688 whether these genes exhibit evolutionary rate heterogeneity across the phylogeny. For all genes  
689 except *Obp56f* and *Obp56i*, we found significant evidence of heterogeneity in  $\omega$  (Figure 5B),  
690 indicating these genes have experienced variable selective pressures (and/or variable strengths  
691 of selection) across the *Drosophila* genus.

692

### 693 A subset of seminal Obps are evolving under recurrent positive selection

694 We next tested whether any seminal *Obp* genes show evidence of recurrent positive selection  
695 acting on a subset of sites by comparing model M7 and M8 in PAML, limiting our analysis to  
696 *melanogaster* group species to avoid synonymous site saturation. Using this approach, we  
697 found significant evidence of positive selection for *Obp22a* and *Obp51a*, while the other seminal  
698 *Obp* genes are evolving in a manner consistent with purifying selection (Figure 5B). *Obp22a*  
699 and *Obp51a* were also significant for the M8/M8a model comparison, implying positive selection  
700 rather than neutral divergence accounting for the rapid evolution of sites within these genes.  
701 Plotting the  $\omega$  ratio inferred from the “free-ratio” model onto gene trees for *Obp22a* and *Obp51a*  
702 shows multiple branches have  $\omega > 1$ , including those with lineage-specific duplication events  
703 (Figure 5—figure supplement 8).

704

705 We also used model M8 to infer specific sites under selection for *Obp22a* and *Obp51a* (Figure  
706 5B). We included all detected copies of each gene in our selection analysis, which may have  
707 reduced our power to detect specific sites under selection for *Obp51a*, only one of which had  
708 posterior probability >0.90. For *Obp22a*, we inferred seven sites under selection (Pr>0.90),  
709 which we mapped onto the predicted AlphaFold structure of the protein (Figure 5—figure  
710 supplement 9A) (Jumper et al., 2021). We found that these sites are located on the outside-  
711 facing region of the protein, away from the hydrophobic binding pocket, which has been found to  
712 bind hydrophobic ligands in other Obp proteins such as LUSH (Figure 5—figure supplement 9B)  
713 (Laughlin et al., 2008).

714

#### 715 Male reproductive tract expression of *Obp56g* is derived in a subset of *Drosophila* species

716 Individual components of seminal fluid are known to turn over rapidly between species, though  
717 the larger biochemical classes these components fall into are conserved between species  
718 (Mueller et al., 2005; Swanson et al., 2001; Wigby et al., 2020). Beyond *D. melanogaster*,  
719 *Obp56g* has been detected as a seminal protein in *D. simulans*, *D. yakuba*, and *D.*  
720 *pseudoobscura*, but not in more distantly related *Drosophila* species whose seminal fluid  
721 proteins have been characterized (*D. mojavensis*, *D. virilis*, and *D. montana*), despite the gene  
722 itself being conserved in these species (Ahmed-Braimah et al., 2017; Garlovsky et al., 2020;  
723 Kelleher et al., 2009). Considering our findings that *Obp56g* is required for male fertility in  
724 *melanogaster*, we were curious to see whether male reproductive tract expression of *D.*  
725 *melanogaster* seminal *Obps* was conserved across the *Drosophila* phylogeny. We therefore  
726 leveraged previously published RNAseq data from 8 different *Drosophila* species, focusing  
727 specifically on the male head and male reproductive tract samples, which include the accessory  
728 glands, ejaculatory ducts, ejaculatory bulbs, and terminal genitalia (Yang et al., 2018). We  
729 observed significantly higher expression of *Obp56g* in the male reproductive tract of *D.*  
730 *melanogaster*, *simulans*, *yakuba*, *ananassae*, *persimilis*, and *pseudoobscura* species, and  
731 negligible or zero expression in *D. willistoni*, *virilis*, and *mojavensis* species (Wilcoxon rank sum  
732 test of *melanogaster/obscura* group vs. *repleta* and *virilis* group [excluding *willistoni* which has  
733 *Obp56g* duplications],  $p<0.001$ ), consistent with previous reports that *Obp56g* is a seminal  
734 protein in *melanogaster* and *obscura* group species (Figure 6A) (Findlay et al., 2008; Karr et al.,  
735 2019). In head tissues, we observed high expression of *Obp56g* in all species (Figure 6B). We  
736 confirmed these expression patterns using semi-quantitative RT-PCR on dissected reproductive  
737 tract tissues from *melanogaster*, *ananassae*, *pseudoobscura*, *virilis*, and *mojavensis* males,



738 which showed *Obp56g* has conserved reproductive tract expression (in both the accessory  
 739 gland + ejaculatory duct and ejaculatory bulb tissues) in the *melanogaster* and *obscura* groups,  
 740 and conserved head expression across all species tested (Figure 6—figure supplement 1).

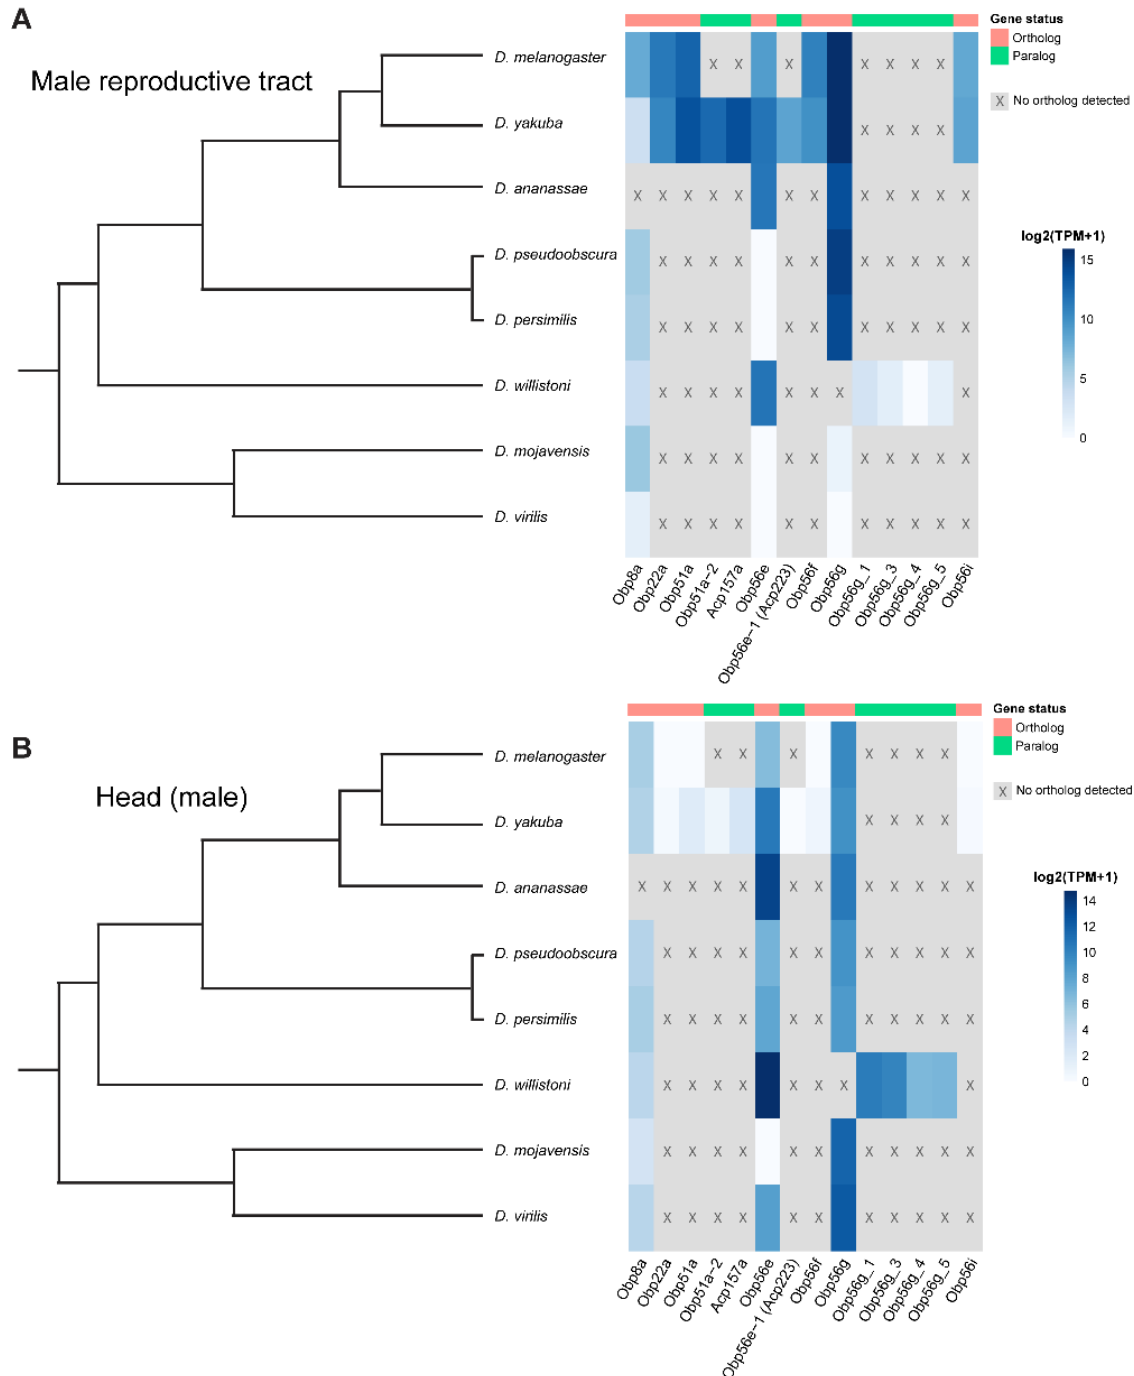

741  
 742 **Figure 6:** Seminal *Obp* genes show changes in expression pattern across species from bulk  
 743 RNAseq data published in Yang et al. (2018). A) log<sub>2</sub> normalized TPM expression values  
 744 (averaged across 4 biological replicates) of seminal *Obp* genes and their associated orthologs  
 745 and paralogs in male reproductive tissue (including accessory glands, ejaculatory duct,  
 746 ejaculatory bulb, and terminal genitalia for all species except *D. melanogaster*, which includes

747 all tissues aside from the genitalia) of different *Drosophila* species. Grey indicates that no  
748 ortholog could be detected in that species. B) log<sub>2</sub> normalized TPM expression values of  
749 seminal *Obp* gene orthologs and paralogs in male head tissue.  
750

## 751 **Discussion:**

752 Obps have been identified as seminal fluid components in several insect taxa, though their  
753 functional importance in reproduction has remained unclear. We found that *Obp56g* is required  
754 for mating plug formation, sperm storage, and subsequent male fertility in *D. melanogaster*.  
755 Given that the post-mating response depends on sperm, SP, and the long-term response  
756 network proteins (Findlay et al., 2014; Manning, 1967; Peng et al., 2005), loss of ejaculate in  
757 *Obp56g* mutant males can explain the loss of long-term responses in females that we observed.  
758 Recent proteomic evidence has demonstrated that Obp56g is among the most highly abundant  
759 SFPs in the mating plug, supporting our inference that it is important for this process  
760 (McDonough-Goldstein et al., 2022). We further found *Obp56g* transcripts are primarily derived  
761 from the ejaculatory bulb (though transcripts were also detected in the ejaculatory duct and  
762 accessory glands), which has previously documented functions in mating plug formation (Avila  
763 et al., 2015; Bretman et al., 2010; Lung and Wolfner, 2001). This ejaculatory bulb/duct  
764 expression is required for mating plug formation and fertility. We note that *CrebA-GAL4* does  
765 not drive expression in the accessory gland (Avila et al., 2015), suggesting that any residual  
766 expression in this tissue in these males is not sufficient to induce mating plug formation and the  
767 PMR.

768  
769 We now have functional evidence for a growing list of mating plug and/or EB-derived SFPs,  
770 including Acp36DE, PEB-me, EbpII, and Obp56g (Avila et al., 2015; Bretman et al., 2010;  
771 Neubaum and Wolfner, 1999). Additionally, approaches such as gas chromatography-mass  
772 spectrometry and proteomics have characterized the male- and female-derived compounds and  
773 proteins that comprise the mating plug, and experiments dissecting the female tract at different  
774 time points after mating have elucidated the timeline of mating plug formation (Avila et al., 2015;  
775 Gilchrist and Partridge, 2000; Laturney and Billeter, 2016; Lung and Wolfner, 2001;  
776 McDonough-Goldstein et al., 2022). However, we still lack a detailed biochemical understanding  
777 of how the mating plug coagulates, as well as the specific mechanistic roles of the proteins  
778 highlighted above. For example, does Obp56g bind to and transport a hydrophobic reproductive  
779 tract-derived small molecule, as might be expected for an Obp? Does Obp56g concentrate said  
780 molecule within the female tract to trigger mating plug formation, or is it merely structural? Or,  
781 instead of acting as a structural component, does Obp56g signal to the female tract to secrete

782 components that aid in mating plug formation? The answers to such questions will provide  
783 important insight into a crucial reproductive process in flies and other insect species.  
784  
785 *Obp56g* has interesting evolutionary characteristics in that the gene itself is conserved widely  
786 (and our results show it is under purifying selection in the *melanogaster* group), though its  
787 expression pattern in the male reproductive tract is not. Such lineage-specific shifts in  
788 expression have been reported for several other reproductive genes in *Drosophila*, including  
789 glucose dehydrogenase (*Gld*) in ejaculatory duct tissues of the *melanogaster* group, *jamesbond*,  
790 a fatty acid elongase responsible for CH503 production in the ejaculatory bulb, and the Sex  
791 Peptide Receptor (*SPR*), which gained expression in the female reproductive tract in the lineage  
792 leading to the *melanogaster* group (Cavener, 1985; Ng et al., 2015; Tsuda et al., 2015). Our  
793 results also showed that *virilis* and *repleta* group species lack *Obp56g* expression in the male  
794 reproductive tract, which is consistent with proteomic and transcriptomic studies that did not  
795 detect *Obp56g* as a predicted seminal protein in these species (Ahmed-Braimah et al., 2017;  
796 Kelleher et al., 2009). Previous studies have described insemination reactions (*repleta* group)  
797 and “dense copulatory plugs” (*virilis* group) in the bursa of females of these species post-mating  
798 (Markow and Ankney, 1988; Patterson, 1946). While these structures are very likely composed  
799 of ejaculate matter (and female-derived components), whether they are true homologous  
800 structures to the *melanogaster* mating plug, which has documented functional roles in promoting  
801 sperm storage and in post-mating pheromonal mate guarding, is unclear (Avila et al., 2015;  
802 Avila and Wolfner, 2009; Laturney and Billeter, 2016; Neubaum and Wolfner, 1999). A previous  
803 study using electron microscopy to analyze post-mating structures in the female bursa in *D.*  
804 *melanogaster* and *D. mojavensis* found the composition, density, and size of these structures to  
805 be quite distinct, and characterized them as separate phenomena (termed a “sperm sac” and  
806 “true insemination reaction” for *melanogaster* and *mojavensis*, respectively) (Alonso-Pimentel et  
807 al., 1994). Interestingly however, several recent studies have shown rapid divergence and anti-  
808 aphrodisiac function of pheromonal compounds produced in the ejaculatory bulb or male  
809 reproductive tract across *Drosophila* (Chin et al., 2014; Khallaf et al., 2021; Ng et al., 2014).  
810 Elucidating the mechanistic function of *Obp56g* will provide interesting insight into whether the  
811 rapid turnover of male-specific pheromones is linked to the evolutionary changes in expression  
812 we observe for *Obp56g* and the evolutionary turnover in seminal Obps seen across more distant  
813 taxa. A further question remains whether *Obp56g* has a conserved function in mating plug  
814 formation in the species where the gene is an SFP (and its function in those where it is not),  
815 which could help elucidate when and how *Obp56g* acquired its role in reproduction.

816 Furthermore, whether *Obp56g* took over a primary role in mating plug formation after it evolved  
817 reproductive tract expression, and whether “plugs” or other post-mating structures were  
818 fundamentally different prior to this, remains an open question.

819

820 Our results also show that when individually knocked out, only *Obp56g* has a strong effect on  
821 the PMR and male fertility, while loss of the others has no effect (for *Obp8a*, the mutant had  
822 slightly lower remating rates than the control, which is opposite of what is expected for genes  
823 involved in PMR phenotypes). These results can be explained in part given our findings that  
824 *Obp56g* is the only seminal *Obp* that is highly expressed in the ejaculatory bulb, which has  
825 documented functions in mating plug formation. The other *Obps* are derived from the accessory  
826 gland (*Obp51a*, *Obp22a*, *Obp56e*, *Obp56i*, *Obp8a*) or the ejaculatory duct (*Obp51a*), which is  
827 consistent with previous transcriptomic and proteomic studies of the reproductive tract (Findlay  
828 et al., 2008; Li et al., 2022; Majane et al., 2022; Takemori and Yamamoto, 2009). Alternatively,  
829 given these genes are in the same gene family, redundancy might mask any individual gene’s  
830 phenotype, and defects in fertility may only be apparent when these genes are mutated in  
831 combination. Indeed, previous studies in *Drosophila* have shown functional redundancy among  
832 paralogs of the *Obp50* cluster in male starvation resistance (Johnstun et al., 2021).

833 Evolutionarily, it has been hypothesized that sexual conflict between males and females can  
834 drive functional redundancy in the biochemical classes present in seminal fluid through  
835 mechanisms of gene duplication, co-option, and gene loss, though this has never been directly  
836 functionally tested (Sirot et al., 2015).

837

838 Given several previous studies demonstrating elevated divergence of SFP genes in *Drosophila*,  
839 we tested whether any of the seminal *Obp* genes are rapidly evolving in the *melanogaster*  
840 group. We did not detect positive selection on *Obp56g*, *Obp56e*, *Obp56f*, *Obp56i*, or *Obp8a*, but  
841 did detect positive selection acting on *Obp22a* and *Obp51a*. We found that *Obp56g* is highly  
842 expressed in head tissues across all the species we tested, raising the possibility that the gene  
843 is under pleiotropic constraint for a non-reproductive function, thus limiting its capacity to rapidly  
844 diverge (though we did observe a highly diverged paralog of *Obp56g* in the *obscura* clade).  
845 Previous studies in *D. melanogaster* have shown *Obp56g* is highly expressed in gustatory  
846 sensilla in the labellum in males and females, though functional studies of *Obp56g*<sup>1</sup> mutants  
847 showed they had normal attractive and aversive behaviors to sucrose and bitter-tasting  
848 compounds, respectively (Galindo and Smith, 2001; Jeong et al., 2013). In our assays, *Obp56g*<sup>1</sup>  
849 mutants did not have significantly altered mating latency or duration times from controls,

850 indicating it does not play a role in male courtship behavior. Thus, the proboscis-related function  
851 of *Obp56g*, and whether it is conserved across species (which would possibly explain our  
852 observations of purifying selection acting on the gene), remains unknown. Alternatively, *Obp56g*  
853 could possibly be conserved within the *melanogaster* group due to its role in mating plug  
854 formation, as it is essential for full male fertility in *D. melanogaster*. Such a hypothesis is  
855 consistent with previous findings of conservation among some members of the SP network,  
856 whose functions are necessary for successful reproduction in *melanogaster* (McGeary and  
857 Findlay, 2020).

858  
859 Our study also revealed extensive evolutionary lability in copy number of the seminal Obps  
860 across species, which appears to be driven by tandem gene duplication, pseudogenization, and  
861 gene loss, particularly in the *Obp51a* cluster. Gene duplication has been shown to be a major  
862 force in the evolution of female reproductive tract and SFP genes, though the reasons why are  
863 less clear (Findlay et al., 2008). There may be selection acting on increased protein abundance,  
864 which could be accomplished by gene duplication (Kondrashov et al., 2002). Alternatively,  
865 models of sexual conflict propose arms race-style antagonism between males and females,  
866 whereby duplication and divergence of reproductive molecules may allow either sex to counter-  
867 adapt against the other (Findlay et al., 2008; Kelleher and Markow, 2009; Kelleher and  
868 Pennington, 2009; Sirot et al., 2014; Swanson and Vacquier, 2002). Our finding of positive  
869 selection acting on *Obp22a* and *Obp51a* suggests the latter may be involved. Studies have also  
870 previously demonstrated that relaxed constraint following gene duplication can allow for  
871 deleterious or complete loss of function mutations, resulting in gene loss or the formation of  
872 pseudogenes, which could explain the patterns of duplication and pseudogenization we  
873 observed in the *Obp51a* and *Obp22a* clusters (Birchler and Yang, 2022; Ohno, 1970; Sirot et  
874 al., 2015).

875  
876 Overall, our study provides new evidence for a novel reproductive role for Obps, highlighting the  
877 broad functional diversity for this gene family in *Drosophila*. Additionally, we observed  
878 expression shifts, duplication, and divergence in the evolution of these seminal protein genes,  
879 highlighting the myriad mechanisms by which reproductive genes can diverge across species.  
880 The frequent occurrence of Obps in the seminal fluid across distinct taxa raises the possibility  
881 that members of this gene family are repeatedly co-opted into the SFP suite by various means.  
882 Functional studies of seminal Obps across these diverged species will provide important

883 comparative data for whether seminal Obps can evolve roles in reproductive processes beyond  
884 mating plug formation.

885

886 **Acknowledgements:**

887 We would like to thank Dr. Yasir Ahmed-Braimah for help analyzing FlyAtlas2.0 data, Dr. Jolie  
888 Carlisle for help with the evolutionary analysis, Norene Buehner for help with Western blots, and  
889 members of the Wolfner and Clark labs for useful comments and advice. We would also like to  
890 thank Susan Younger, J. Belote and S. Pitnick, the Vienna *Drosophila* Resource Center, the  
891 Bloomington *Drosophila* Stock Center, and the *Drosophila* Species Stock Center for lines. This  
892 work was supported by NIH grant R01-HD059060 to AGC and MFW, NIH postdoctoral  
893 fellowship F32GM097789 to GDF, and NSF grant 2212972 to GDF.

894

895 **Competing interests:**

896 The authors declare that no competing interests exist.

897

898 **Data availability:**

899 All data generated or analyzed for this study are included in the manuscript, supporting files, or  
900 are available on Github. Source data files have been provided for Figure 1C, Figure 2B, Figure  
901 4C, Figure 1—figure supplement 1B, figure supplement 2B, Figure 1—figure supplement 3A &  
902 B, Figure 3—figure supplement 2, Figure 4—figure supplement 2, and Figure 6—figure  
903 supplement 1. All mating data, R code to analyze mating data, RNAseq data across species,  
904 and tree files/alignments for use in PAML are available on Github:

905 <https://github.com/WolfnerLab/Obps>

906

907 The following previously published datasets were used:

908 Delbare SYN, Ahmed-Braimah YH, Wolfner MF, Clark AG. Interactions between the microbiome  
909 and mating influence the female's transcriptional profile in *Drosophila melanogaster*. *Sci Rep*.  
910 2020 Oct 23;10(1):18168. doi: 10.1038/s41598-020-75156-9. PMID: 33097776; PMCID:  
911 PMC7584617.

912

913 Yang H, Jaime M, Polihronakis M, Kanegawa K, Markow T, Kaneshiro K, Oliver B. Re-  
914 annotation of eight *Drosophila* genomes. *Life Sci Alliance*. 2018 Dec 24;1(6):e201800156. doi:  
915 10.26508/lsa.201800156. PMID: 30599046; PMCID: PMC6305970.

916

917 Li H, Janssens J, De Waegeneer M, Kolluru SS, Davie K, Gardeux V, Saelens W, David FPA,  
918 Brbić M, Spanier K, Leskovec J, McLaughlin CN, Xie Q, Jones RC, Brueckner K, Shim J,  
919 Tattikota SG, Schnorrer F, Rust K, Nystul TG, Carvalho-Santos Z, Ribeiro C, Pal S,  
920 Mahadevaraju S, Przytycka TM, Allen AM, Goodwin SF, Berry CW, Fuller MT, White-Cooper H,  
921 Matunis EL, DiNardo S, Galenza A, O'Brien LE, Dow JAT; FCA Consortium§; Jasper H, Oliver  
922 B, Perrimon N, Deplancke B, Quake SR, Luo L, Aerts S, Agarwal D, Ahmed-Braimah Y,  
923 Arbeitman M, Ariss MM, Augsburger J, Ayush K, Baker CC, Banisch T, Birker K, Bodmer R,  
924 Bolival B, Brantley SE, Brill JA, Brown NC, Buehner NA, Cai XT, Cardoso-Figueiredo R,  
925 Casares F, Chang A, Clandinin TR, Crasta S, Desplan C, Detweiler AM, Dhakan DB, Donà E,  
926 Engert S, Floc'hlay S, George N, González-Segarra AJ, Groves AK, Gumbin S, Guo Y, Harris  
927 DE, Heifetz Y, Holtz SL, Horns F, Hudry B, Hung RJ, Jan YN, Jaszczak JS, Jefferis GSXE,  
928 Karkanias J, Karr TL, Katheder NS, Kezos J, Kim AA, Kim SK, Kockel L, Konstantinides N,  
929 Kornberg TB, Krause HM, Labott AT, Laturney M, Lehmann R, Leinwand S, Li J, Li JSS, Li K, Li  
930 K, Li L, Li T, Litovchenko M, Liu HH, Liu Y, Lu TC, Manning J, Mase A, Matera-Vatnick M,  
931 Matias NR, McDonough-Goldstein CE, McGeever A, McLachlan AD, Moreno-Roman P, Neff N,  
932 Neville M, Ngo S, Nielsen T, O'Brien CE, Osumi-Sutherland D, Özel MN, Papatheodorou I,  
933 Petkovic M, Pilgrim C, Pisco AO, Reisenman C, Sanders EN, Dos Santos G, Scott K, Sherlekar  
934 A, Shiu P, Sims D, Sit RV, Slaidina M, Smith HE, Sterne G, Su YH, Sutton D, Tamayo M, Tan  
935 M, Tastekin I, Treiber C, Vacek D, Vogler G, Waddell S, Wang W, Wilson RI, Wolfner MF, Wong  
936 YE, Xie A, Xu J, Yamamoto S, Yan J, Yao Z, Yoda K, Zhu R, Zinzen RP. Fly Cell Atlas: A  
937 single-nucleus transcriptomic atlas of the adult fruit fly. *Science*. 2022 Mar  
938 4;375(6584):eabk2432. doi: 10.1126/science.abk2432. Epub 2022 Mar 4. PMID: 35239393;  
939 PMCID: PMC8944923.

940

941

942

943

944

945

946

947

948

949

950

951 **Supplemental figures & figure legends:**

952

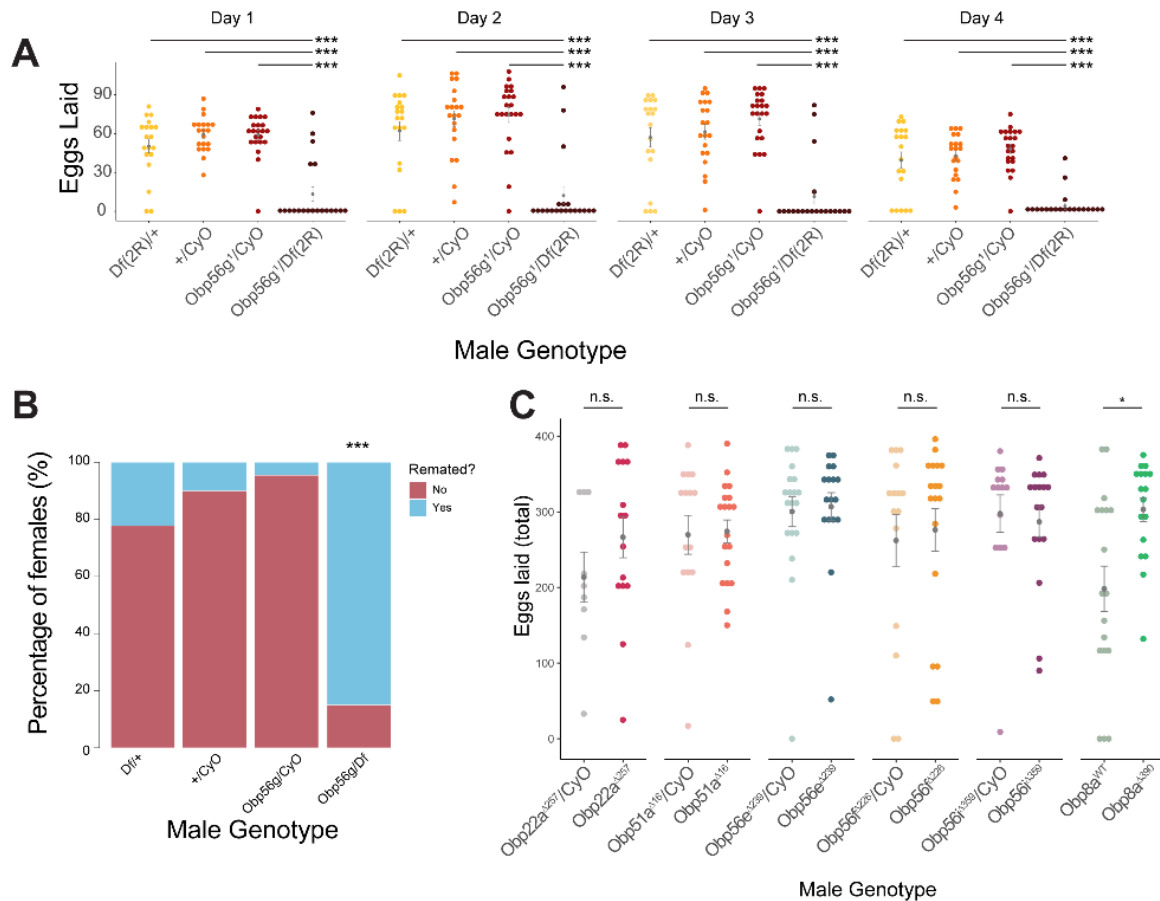

953

954 **Figure 1—figure supplement 1:** Additional replicate of PMR phenotypes from CS females

955 mated to *Obp56g* and CRISPR mutant males. A) Egg counts from CS females mated to

956 *Df(2R)/+*, *CyO/+ Obp56g<sup>1</sup>/CyO*, or *Obp56g<sup>1</sup>/Df(2R)* males from 1-4 days after mating.

957 Significance indicated from pairwise comparisons of male genotypes within days using

958 emmeans on a Poisson linear mixed effects model. Error bars represent mean +/- SEM. B)

959 Proportion of females who did or did not remate with a standard CS male on the fourth day after

960 mating. Significance indicated from tests of equality of proportions. C) Egg counts from CS

961 females mated to homozygous null or heterozygous control males (except for *Obp8a*, the

962 control of which is from an unedited sibling line) from 1-4 days after mating. Error bars represent

963 mean +/- SEM. Significance indicated from Poisson linear models with Benjamini-Hochberg

964 corrections for multiple comparisons. Significance levels: \* $P < 0.05$ , \*\* $P < 0.01$ , \*\*\* $P < 0.001$ , n.s.

965 not significant.

966



967 Figure 1—figure supplement 1—source data 1: Remating counts and percentages for data  
968 shown in Figure 1—figure supplement 1B.  
969

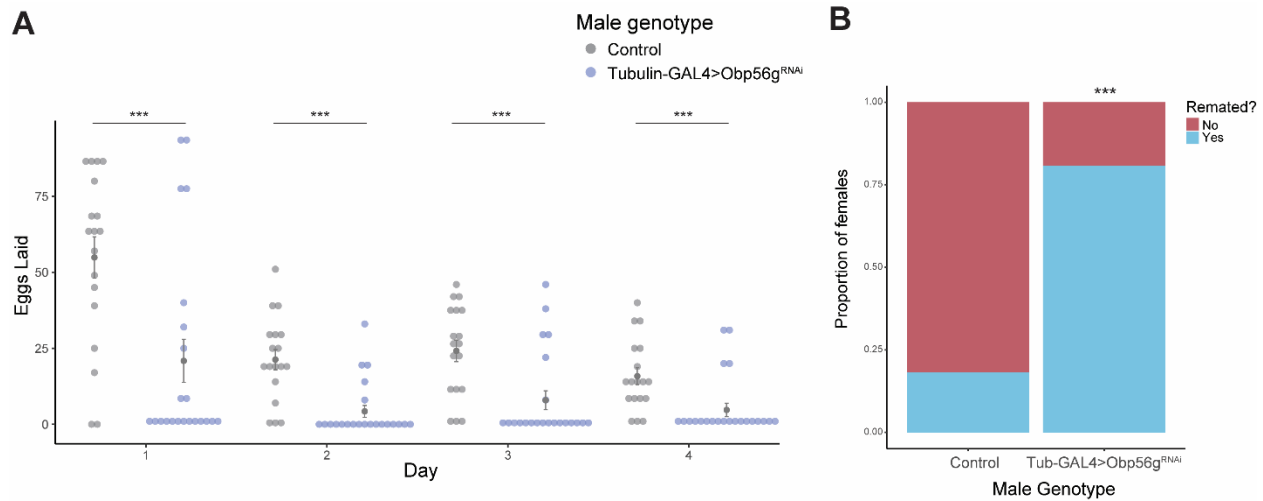

970  
971 **Figure 1—figure supplement 2:** Whole body knockdown of *Obp56g* using *Tubulin-GAL4*  
972 results in loss of post-mating response phenotypes in females. (A) Counts of eggs from mated  
973 CS females over 4 days. Females mated to *Tubulin-GAL4>Obp56g<sup>RNAi</sup>* males lay significantly  
974 fewer eggs than females mated to control males ( $p < 0.001$ ,  $n = 20-24$ ). (B) CS females mated to  
975 *Tubulin-GAL4>Obp56g<sup>RNAi</sup>* males are significantly more likely to remate 4 days post-mating  
976 relative to control males ( $p < 0.001$ ,  $n = 26-33$ ). Error bars represent mean  $\pm$  SEM. Significance  
977 level: \*  $p < 0.05$ , \*\*  $p < 0.01$ , \*\*\*  $p < 0.001$ .

978  
979 Figure 1—figure supplement 2—source data 1: Remating counts and percentages for data  
980 shown in Figure 1—figure supplement 2B.  
981

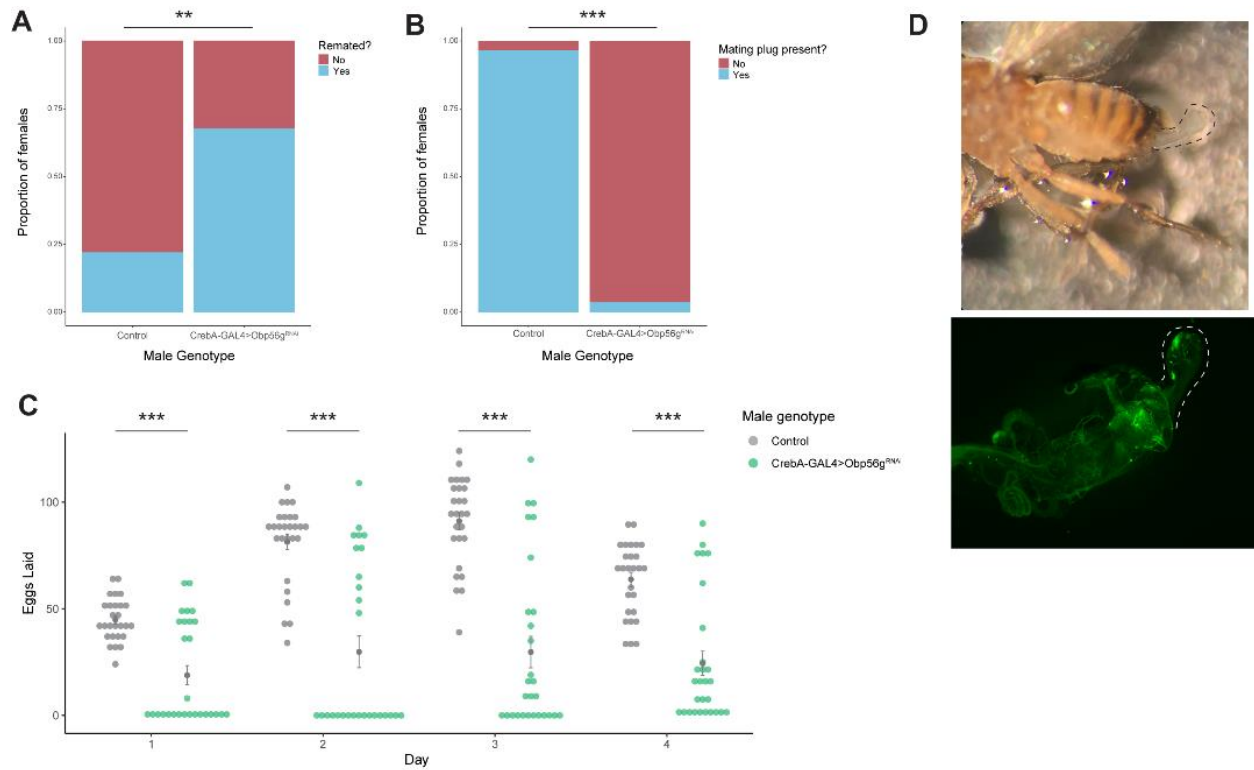

982

983 **Figure 1—figure supplement 3: Male reproductive tract knockdown of *Obp56g* with *CrebA-***  
 984 ***GAL4* is required for the post-mating response and mating plug formation. (A) CS females**  
 985 **mated to *CrebA-GAL4>Obp56g<sup>RNAi</sup>* males are significantly more likely to remate 4 days post-**  
 986 **mating relative to control males ( $p=0.001$ ,  $n=27-28$ ). (B) A significantly reduced proportion of**  
 987 **females mated to *CrebA-GAL4>Obp56g<sup>RNAi</sup>* males have fully formed mating plugs in their bursa**  
 988 **immediately after the end of mating relative to females mated to control males ( $p<0.001$ ,  $n=27-$**   
 989  **$30$ ). (C) Counts of eggs from mated CS females over 4 days. CS females mated to *CrebA-***  
 990 ***GAL4>Obp56g<sup>RNAi</sup>* lay significantly fewer numbers of eggs relative to CS females mated to control**  
 991 **males ( $p<0.001$ ,  $n=27-28$ ). (D) Ejaculate loss (dotted line) from the bursa observed in females**  
 992 **mated to *CrebA-GAL4>Obp56g<sup>RNAi</sup>* males, with the bursa dissected and imaged for GFP to**  
 993 **visualize the autofluorescent speckles that comprise the uncoagulated mating plug. Error bars**  
 994 **represent mean  $\pm$  SEM. Significance level: \*  $p<0.05$ , \*\*  $p<0.01$ , \*\*\*  $p<0.001$ .**

995

996 Figure 1—figure supplement 3—source data 1: Counts and percentages for data shown in  
 997 Figure 1—figure supplement 3A & B.

998

999

1000

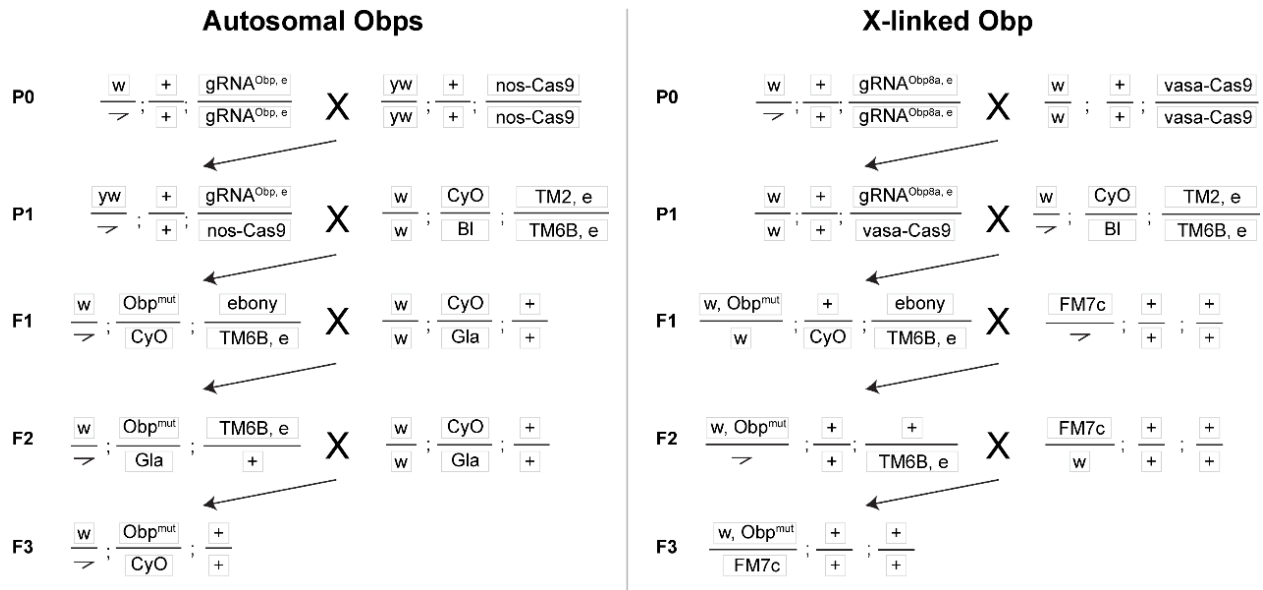

1001

1002

**Figure 2—figure supplement 1:** Crossing scheme to generate CRISPR mutants in autosomal (*Obp22a*, *Obp51a*, *Obp56e*, *Obp56f*, *Obp56i*) and X-linked (*Obp8a*) *Obp* genes used in this study, with text boxes representing chromosomes X/Y, 2, and 3 (dot chromosome not shown).

1003

1004

The kinked line represents the Y chromosome. *Obp* and *ebony* CRISPR editing takes place in the germline of individuals in the P1 generation. *ebony* editing can happen on either the gRNA or Cas9 chromosomes (written out in the F1 generation as “*ebony*” for simplicity), which are removed from the genetic background before assaying males for reproductive phenotypes.

1005

1006

1007

1008

1009

1010

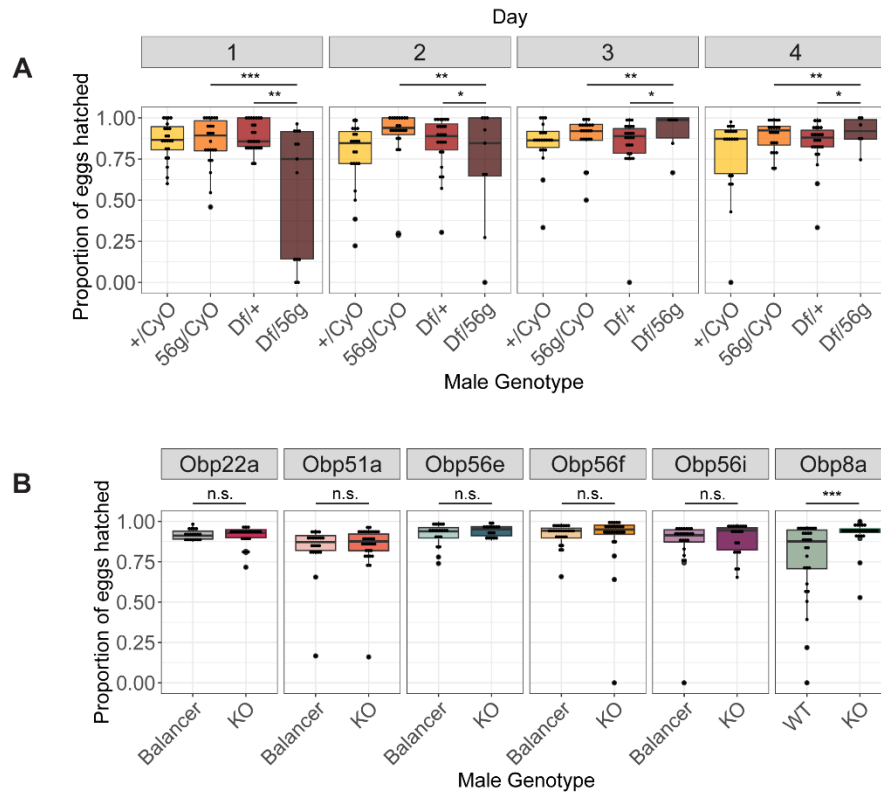

1011

1012 **Figure 2—figure supplement 2:** Box plots of hatchability estimates from CS females mated to

1013 *Obp56g* or CRISPR mutant males. A) Proportion of eggs hatched over 4 days from females

1014 mated to *Df(2R)/+*, *CyO/+ Obp56g<sup>1</sup>/CyO*, or *Obp56g<sup>1</sup>/Df(2R)* males. Significance indicated from

1015 pairwise comparisons of male genotypes across days using emmeans on a binomial mixed

1016 effects model. B) Proportion of eggs hatched over 4 days from females mated to CRISPR

1017 mutant males. Significance indicated from binomial linear models with Benjamini-Hochberg

1018 corrections for multiple comparisons. Significance levels: \* $P < 0.05$ , \*\* $P < 0.01$ , \*\*\* $P < 0.001$ , n.s.

1019 not significant.

1020

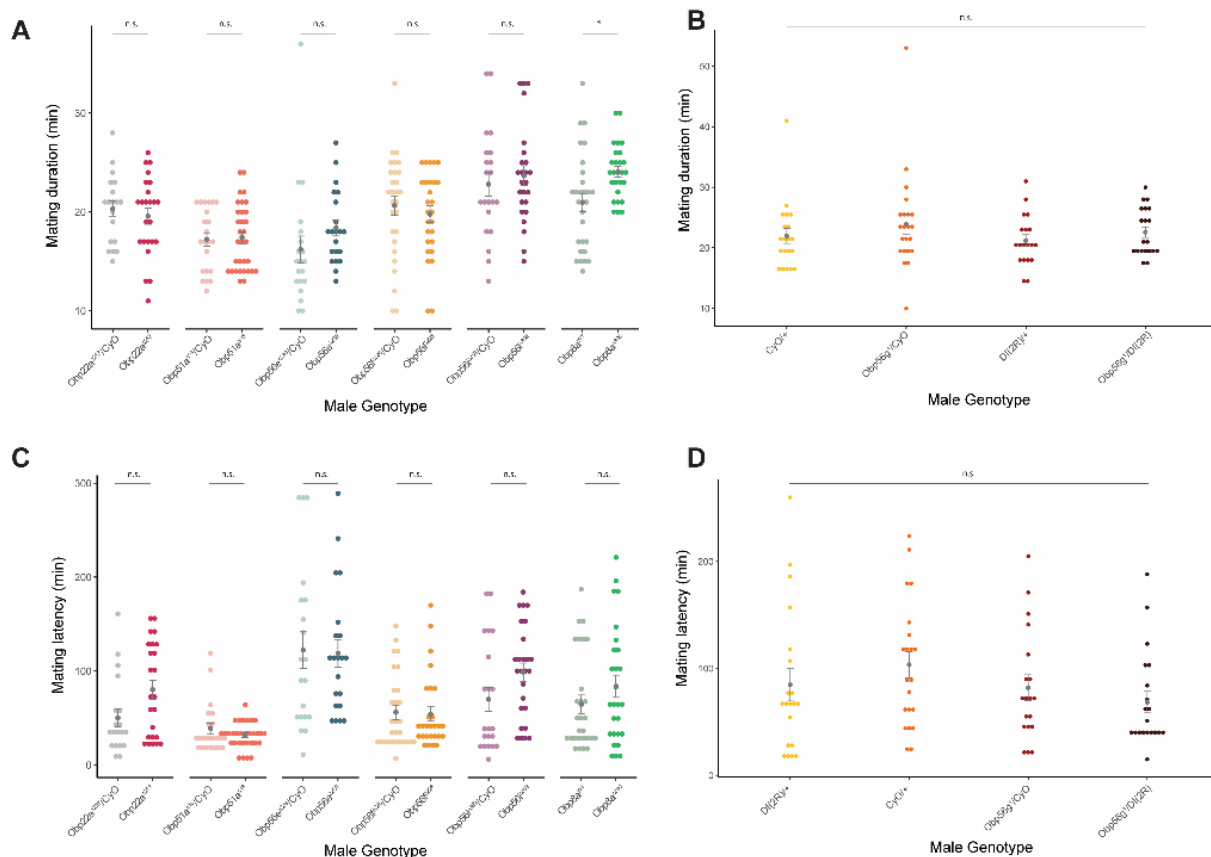

1021  
 1022 **Figure 2—figure supplement 3:** Mating latency and duration measurements from *Obp56g<sup>1</sup>* and  
 1023 CRISPR-generated *Obp* mutants with CS females. (A & B) *Obp8a<sup>Δ390</sup>* mutant flies mate for longer  
 1024 duration than *Obp8a<sup>WT</sup>* control flies ( $p < 0.05$ , mean *Obp8a<sup>WT</sup>* 20.96 minutes, mean *Obp8a<sup>Δ390</sup>* 24.07  
 1025 minutes), though no other statistically significant differences were observed between mating  
 1026 duration of mutant or control males for other genotypes ( $p > 0.05$  for ANOVA [*Obp56g<sup>1</sup>*] or  
 1027 Benjamini-Hochberg corrected  $p$ -values from Student's t-tests [CRISPR mutants]). (C & D) No  
 1028 statistically significant differences observed between mating latency of mutant or control males  
 1029 with CS females ( $p > 0.05$  for ANOVA [*Obp56g<sup>1</sup>*] or Benjamini-Hochberg corrected  $p$ -values from  
 1030 Student's t-tests [CRISPR mutants]).  $n$  for each genotype ranged from 19 to 32. Error bars  
 1031 represent mean  $\pm$  SEM. Significance level: \*  $p < 0.05$ , \*\*  $p < 0.01$ , \*\*\*  $p < 0.001$ , n.s. not  
 1032 significant.

1033

1034

1035

1036

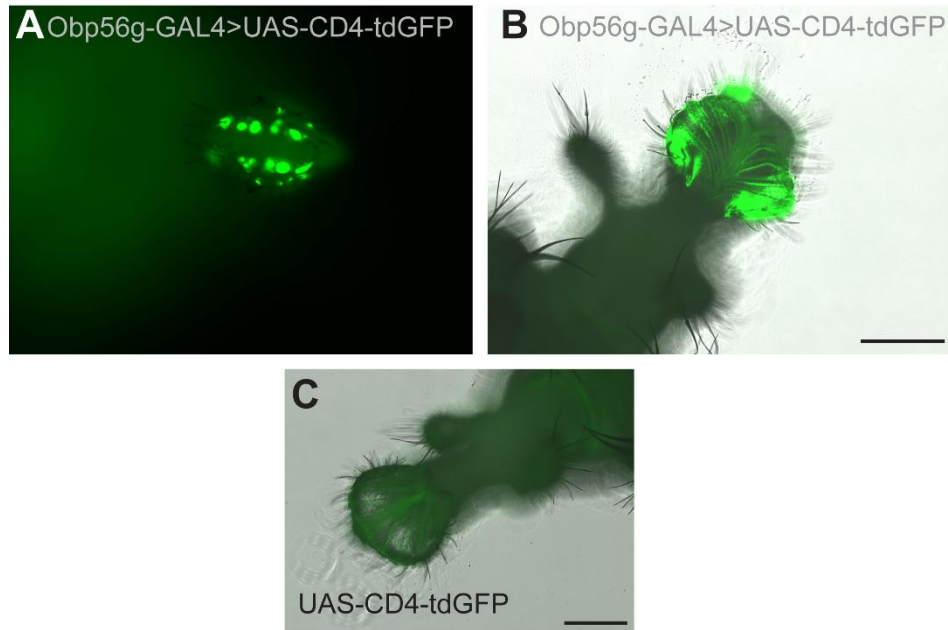

1037

1038 **Figure 3—figure supplement 1:** Expression of *Obp56g-GAL4* in the gustatory bristles of the  
1039 labellum. A) GFP expression from *Obp56g-GAL4>UAS-CD4-tdGFP* males in the head. This  
1040 sample is not placed under a coverslip. B) GFP expression in the same genotype, with the  
1041 proboscis dissected off and gently pressed under a coverslip. C) GFP expression in *UAS-CD4-*  
1042 *tdGFP* control male labellum. Scale bar=130um.

1043

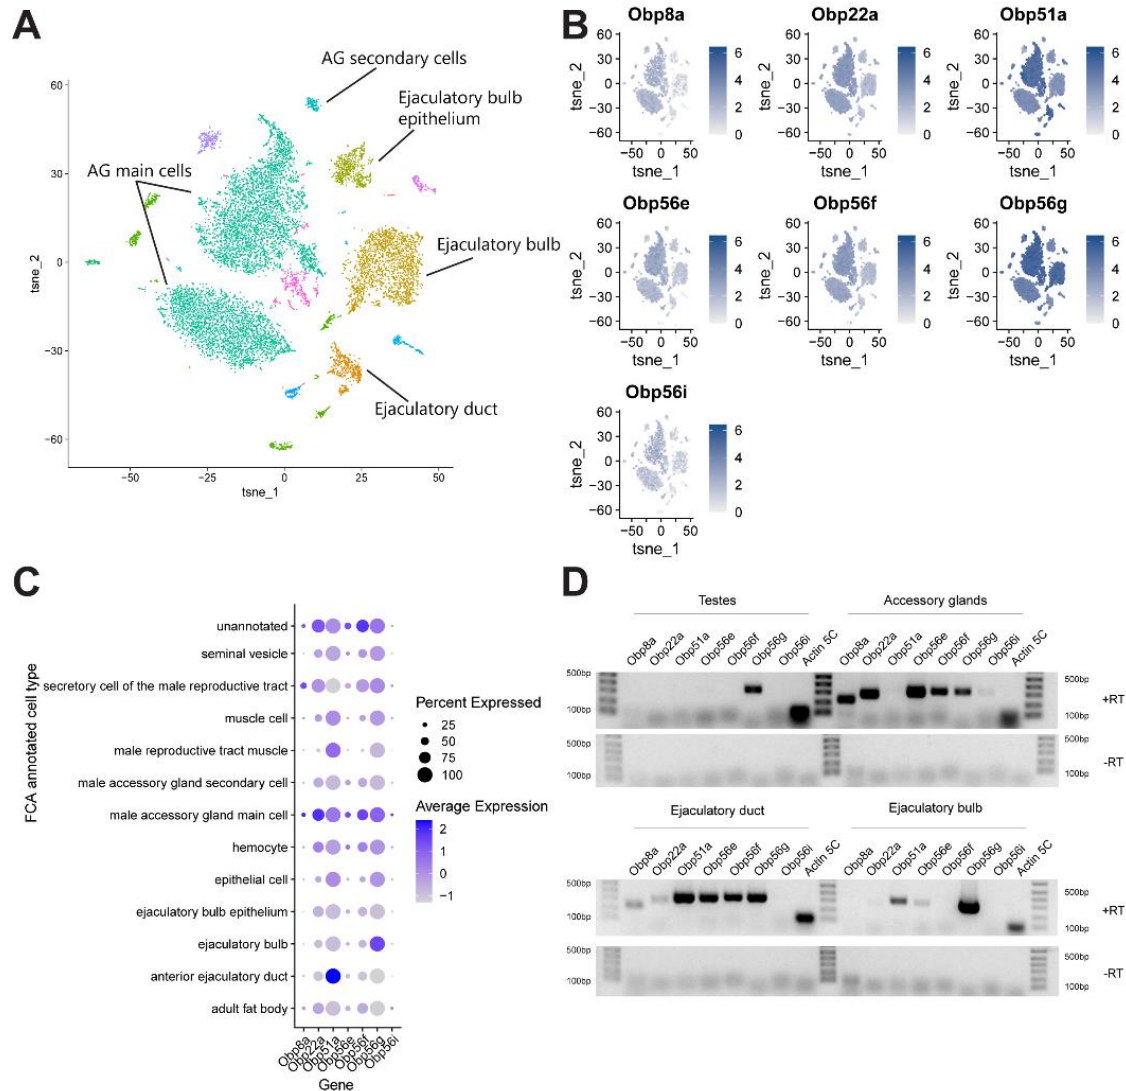

1044

1045 **Figure 3—figure supplement 2:** *Obp56g* is the most highly expressed seminal *Obp* in the  
 1046 ejaculatory bulb. A) Seurat tSNE dimensionality reduction plot of single nucleus RNAseq  
 1047 expression data from the male reproductive tract (without testes) and their major cell type  
 1048 annotations according to (Li et al., 2022). B) Feature plots from Seurat showing expression of  
 1049 the seminal *Obp* genes across single nuclei from A. C) Seurat dot plot of scaled average gene  
 1050 expression across annotated cell types for seminal *Obp*s. Dot size indicates the percentage of  
 1051 cells within a cluster that express each *Obp* gene. D) Agarose gel of RT-PCR products of  
 1052 seminal *Obp* genes from microdissected bulk tissues of the *D. melanogaster* male reproductive  
 1053 tract (testes, accessory glands, ejaculatory ducts, and ejaculatory bulbs), with *Actin 5C* used as  
 1054 the positive control for each tissue. Samples treated with reverse transcriptase are above, and  
 1055 those without below (as a negative control), for each tissue type. PCR was performed for 35  
 1056 cycles.

1057

1058 Figure 3—figure supplement 2—source data 1: Raw and uncropped, labeled gel images for  
1059 data shown in Figure 3—figure supplement 2D.

1060

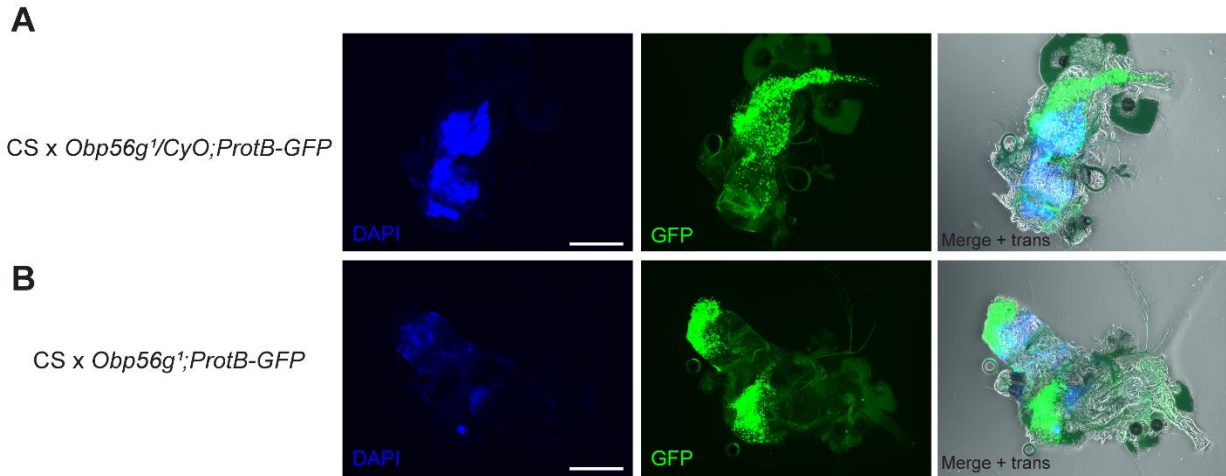

1061

1062 **Figure 4—figure supplement 1:** *Obp56g<sup>1</sup>* mutant males do not have gross issues with sperm  
1063 transfer during mating at the 12-minute ASM time point. A) Representative CS female mated to  
1064 *Obp56g<sup>1</sup>/CyO;ProtB-eGFP* control males, showing DAPI (mating plug), GFP (sperm heads),  
1065 and merge + transillumination microscopy images. 9/9 females mated to these males had  
1066 mating plugs, and 9/9 had sperm masses present in their bursas. B) Representative CS female  
1067 mated to *Obp56g<sup>1</sup>;ProtB-eGFP* mutant males. 0/10 females had mating plugs, though 10/10  
1068 had sperm masses present in their bursas.

1069

1070

1071

1072

1073

1074



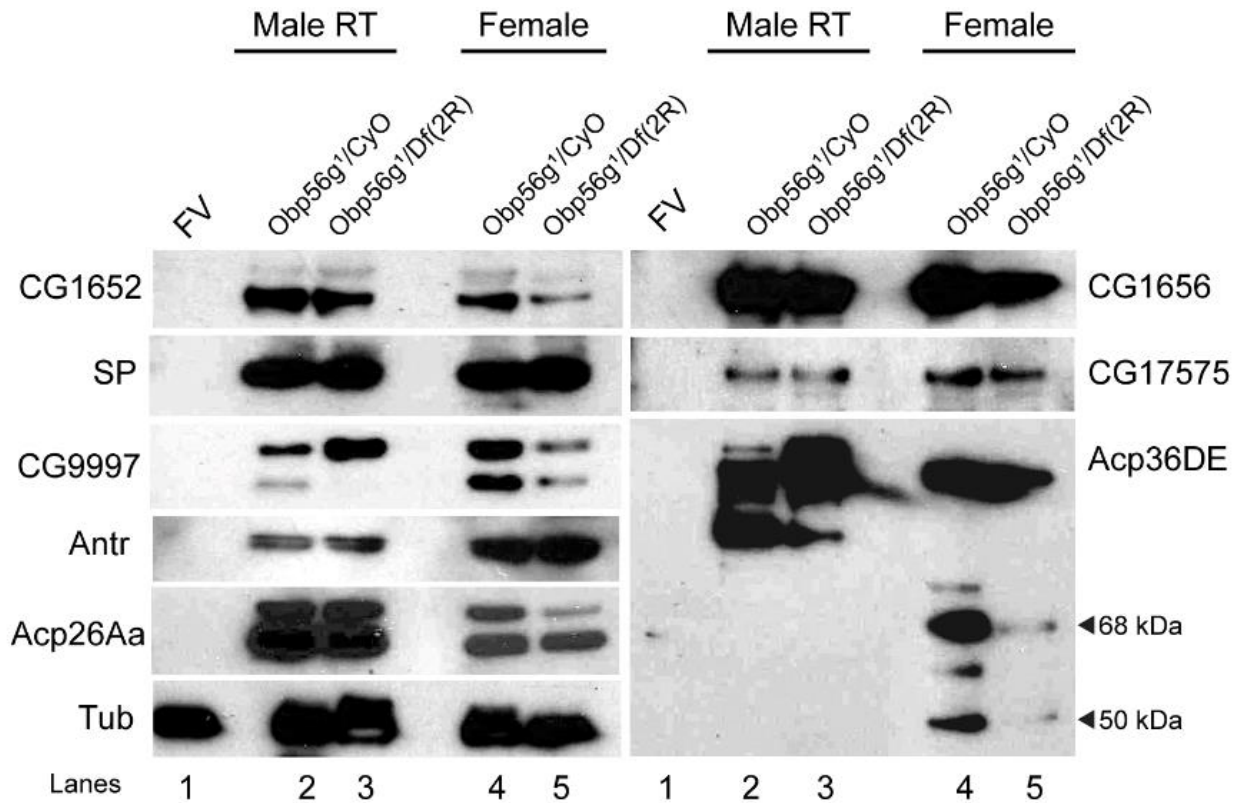

1075

1076 **Figure 4—figure supplement 2:** Females mated to *Obp56g<sup>1</sup>* null males have reduced amounts  
 1077 of SFPs in their bursas 35 minutes ASM. Western blots for SFPs in 1) unmated female  
 1078 reproductive tracts, (2-3) male reproductive tracts, or (4-5) mated female reproductive tracts  
 1079 from CS females mated to either *Obp56g<sup>1</sup>/CyO* control or *Obp56g<sup>1</sup>/Df(2R)* males at 35 minutes  
 1080 ASM. All flies are 3-5 days old. Tubulin is shown as a loading control. Cleavage products of  
 1081 Acp36DE (68kDa and 50kDa) are shown with black arrows.

1082

1083 Figure 4—figure supplement 2—source data 1: Raw film images and uncropped, labeled  
 1084 Western blots for data shown in Figure 4—figure supplement 2.

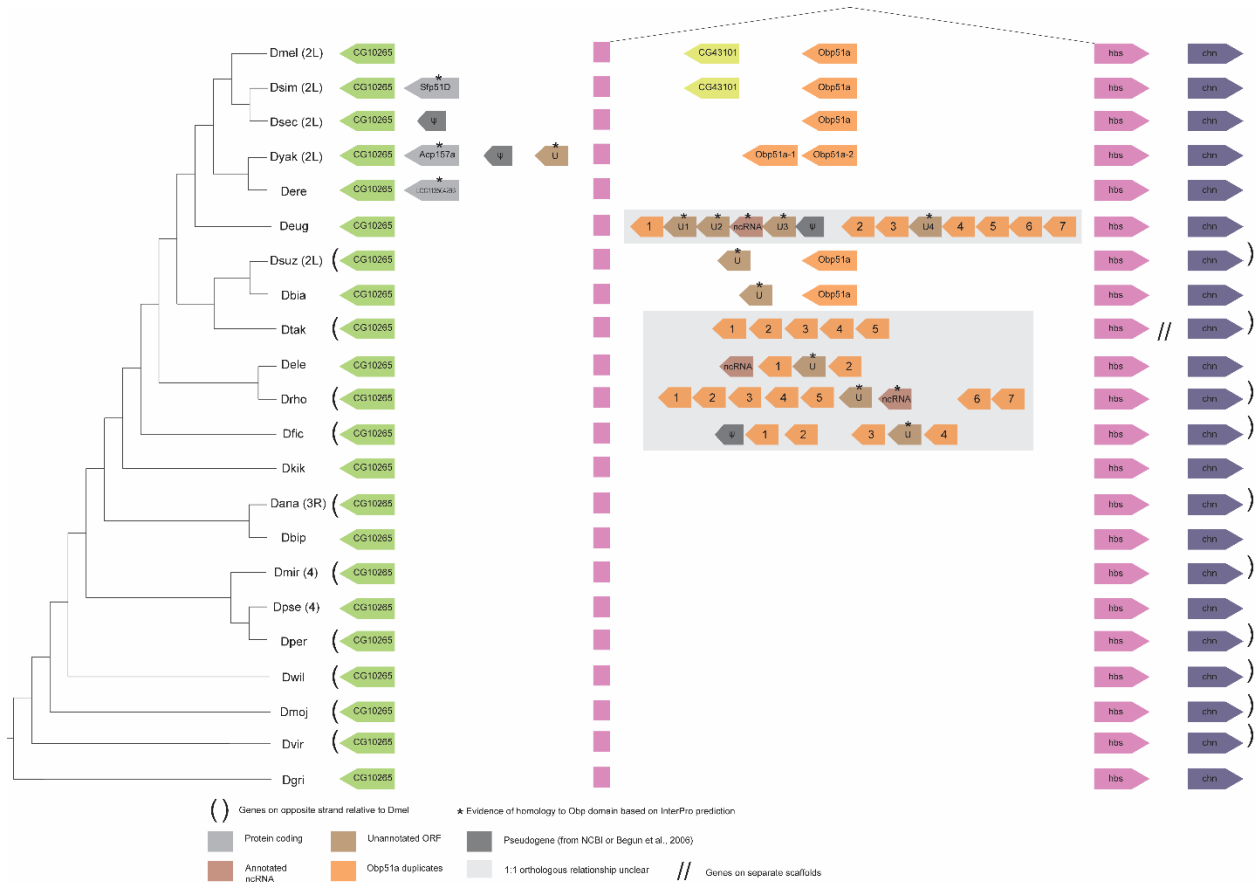

1085

1086

1087

1088

**Figure 5—figure supplement 1:** Synteny plot for *Obp51a*, phylogeny on the left from (McGeary and Findlay, 2020). Surrounding gene names represent gene names in *D. melanogaster*.

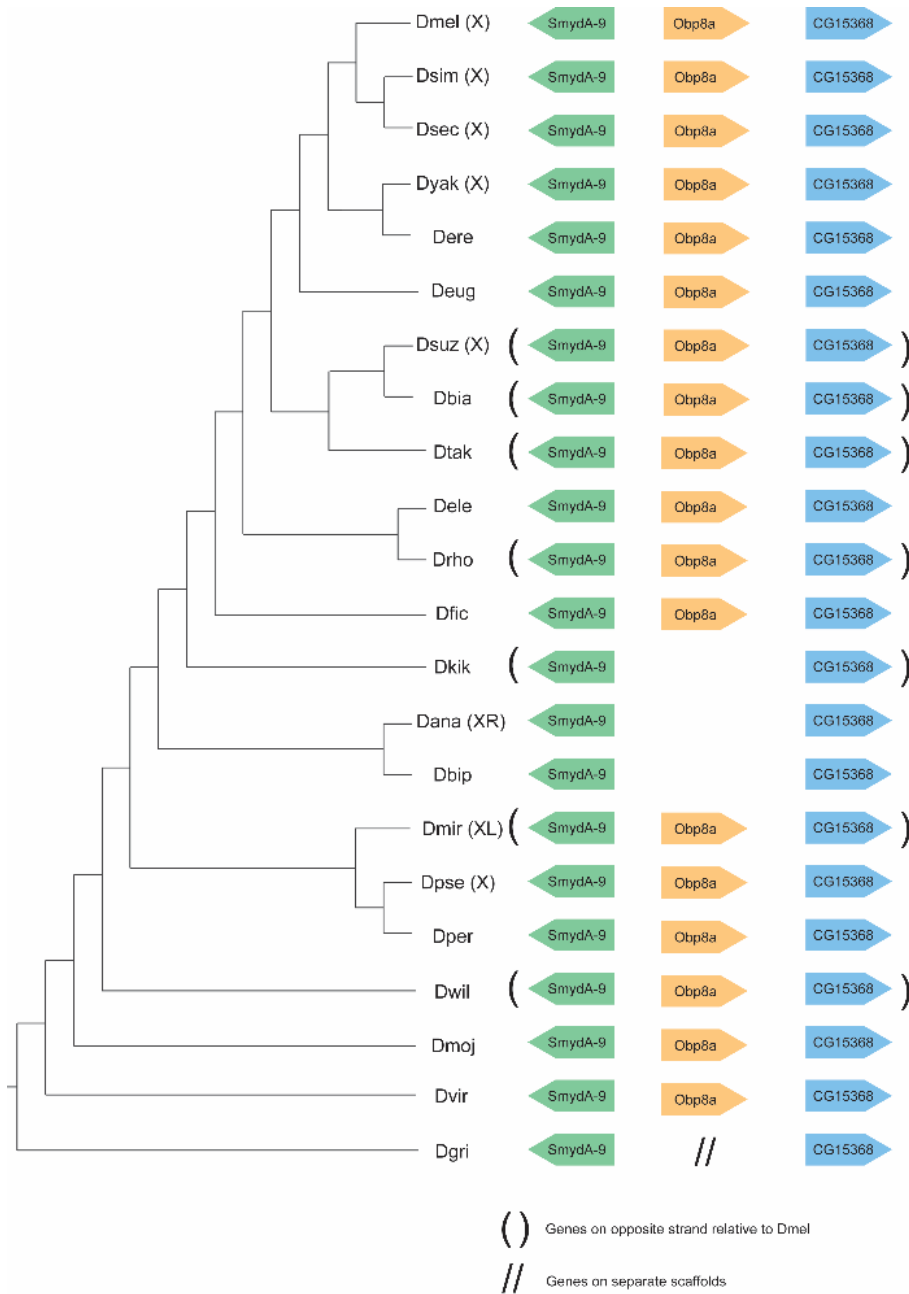

1089  
 1090  
 1091  
 1092

**Figure 5—figure supplement 2:** Synteny plot for *Obp8a*, phylogeny on the left from (McGeary and Findlay, 2020). Surrounding gene names represent gene names in *D. melanogaster*.

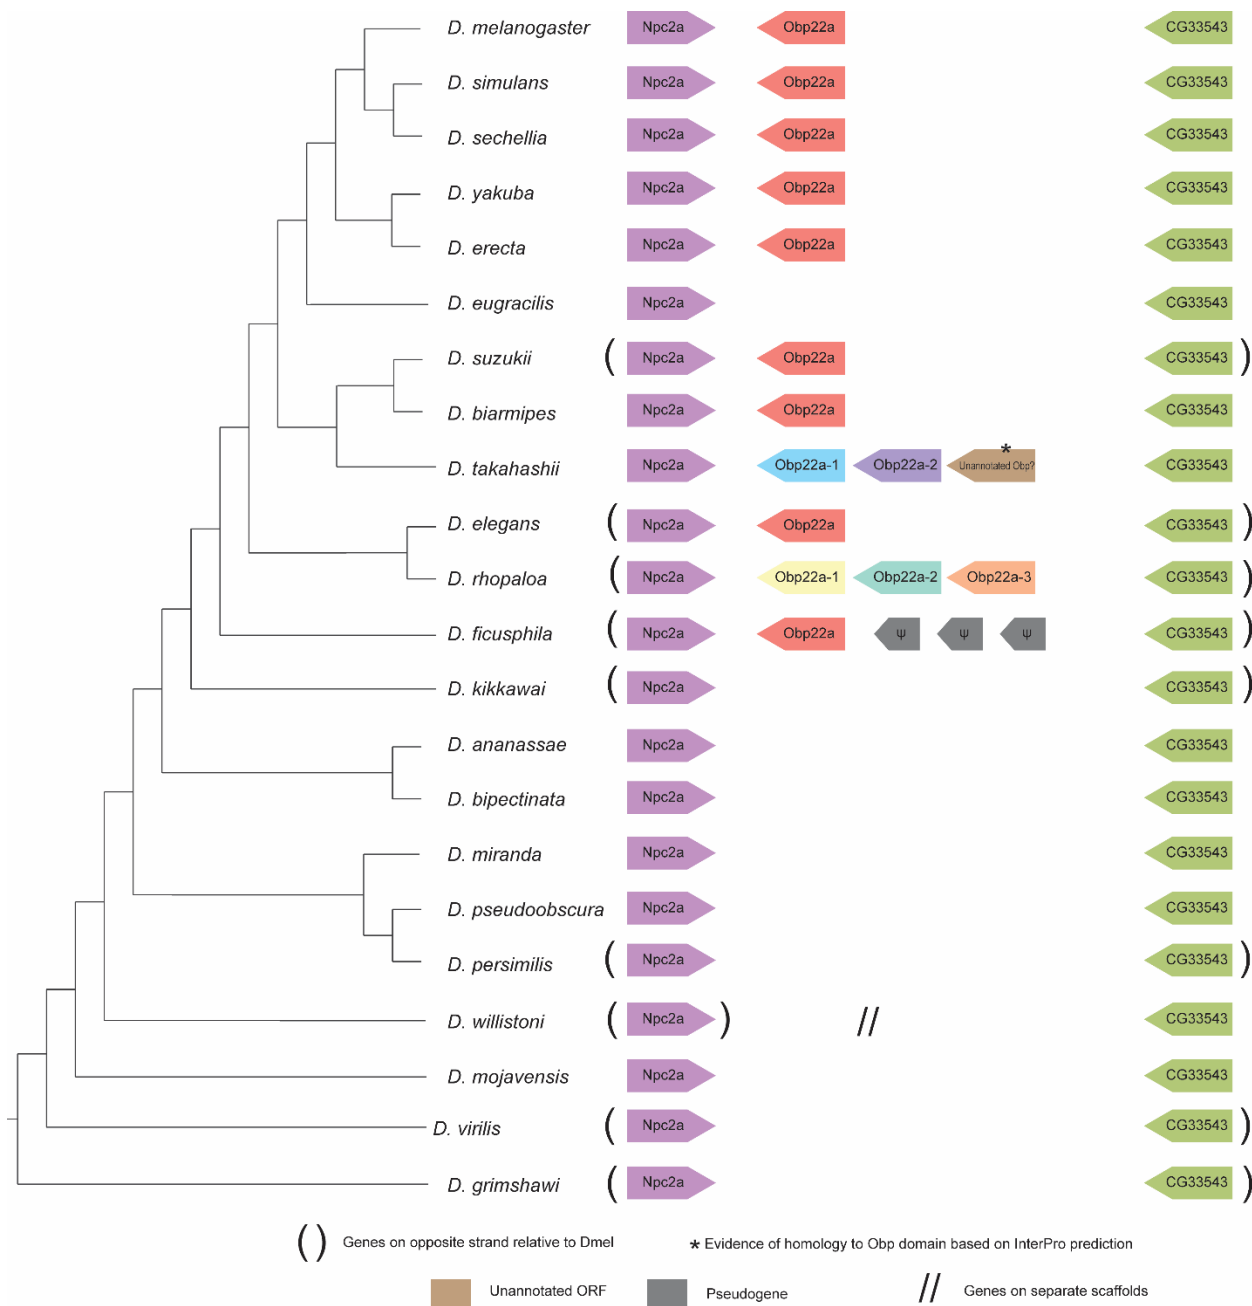

1093

1094 **Figure 5—figure supplement 3:** Synteny plot for *Obp22a*, phylogeny on the left from (McGeary

1095 and Findlay, 2020). Surrounding gene names represent gene names in *D. melanogaster*.

1096

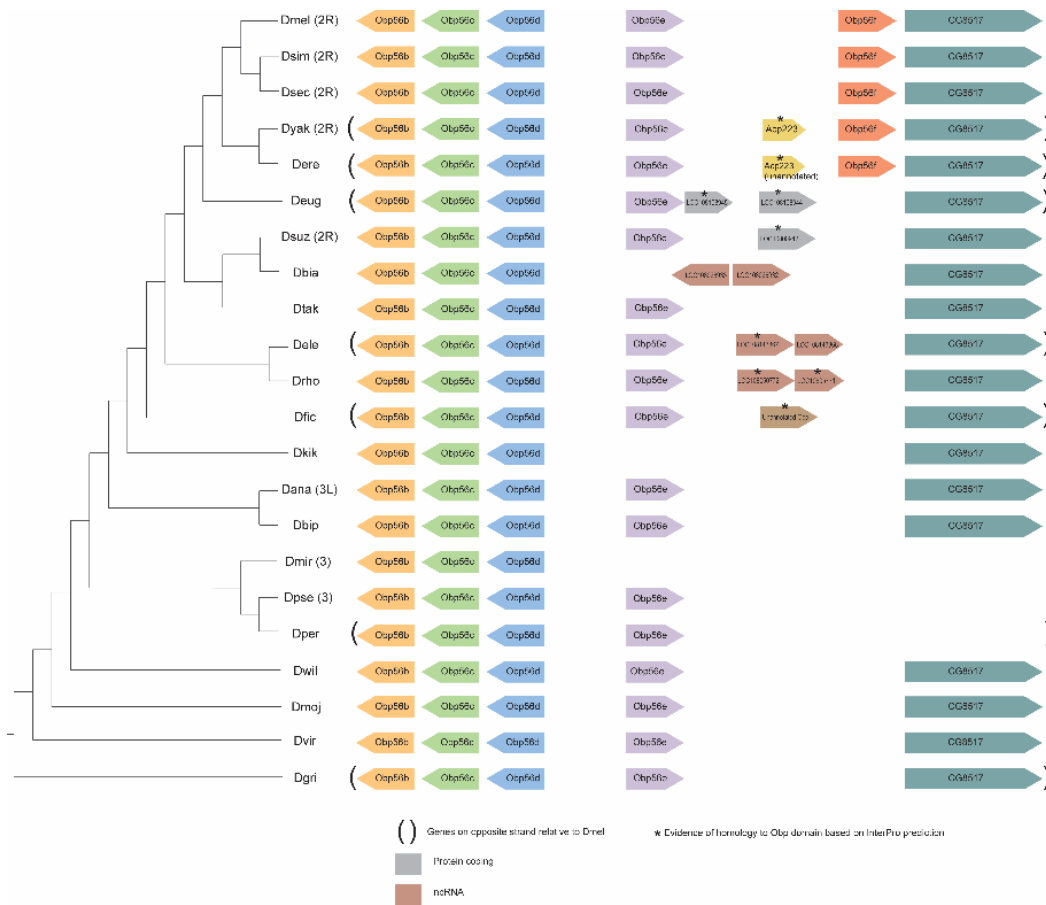

1097  
 1098  
 1099  
 1100  
 1101

**Figure 5—figure supplement 4:** Synteny plot for *Obp56e* and *Obp56f*, phylogeny on the left from (McGeary and Findlay, 2020). Surrounding gene names represent gene names in *D. melanogaster*.

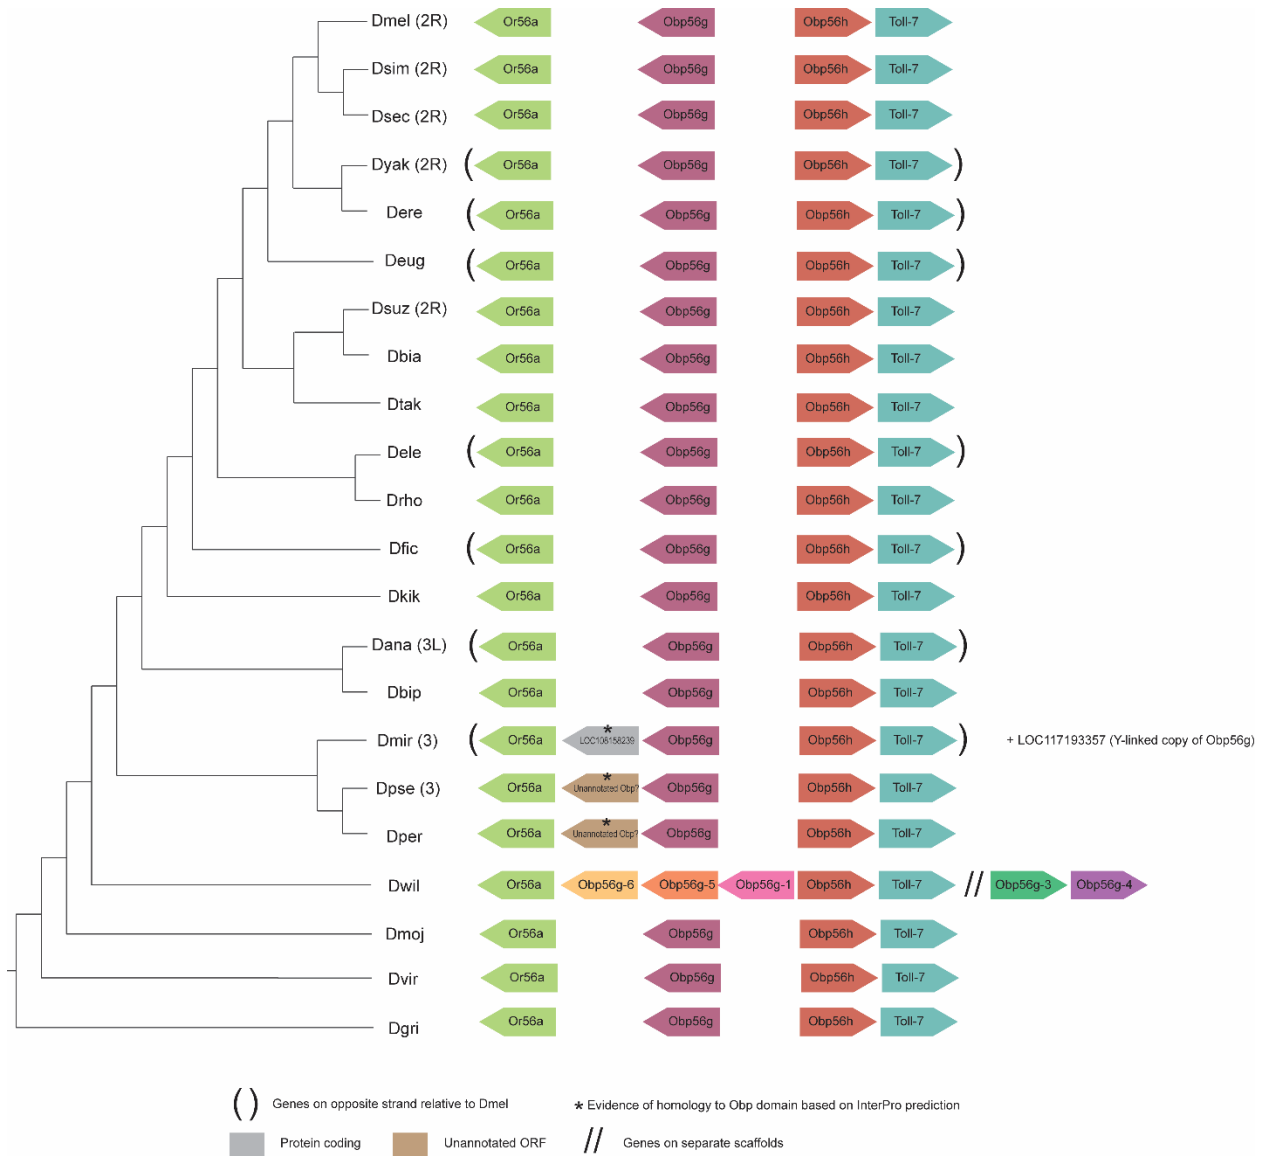

1102

1103 **Figure 5—figure supplement 5:** Synteny plot for *Obp56g*, phylogeny on the left from (McGeary

1104 and Findlay, 2020). Surrounding gene names represent gene names in *D. melanogaster*.

1105

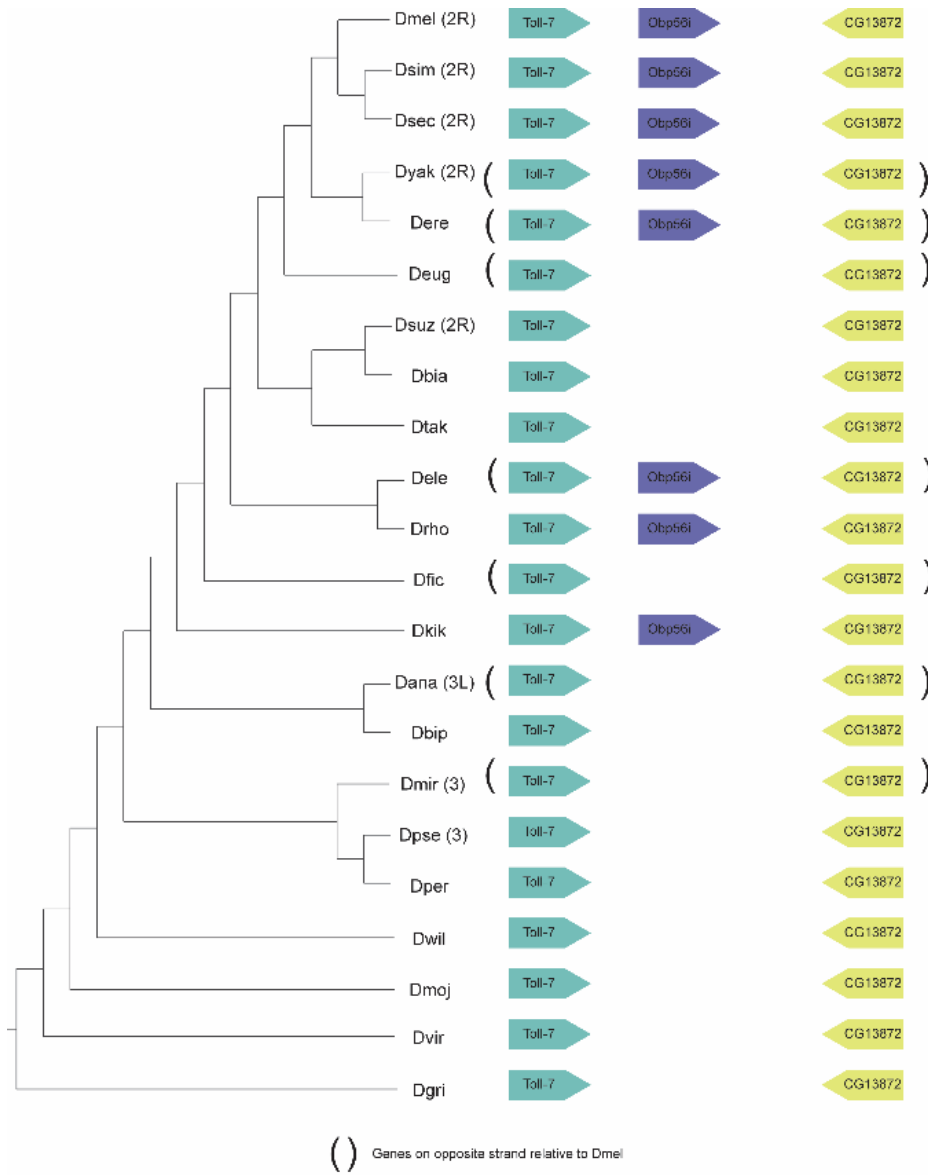

1106

1107 **Figure 6—figure supplement 6:** Synteny plot for *Obp56i*, phylogeny on the left from (McGeary  
1108 and Findlay, 2020). Surrounding gene names represent gene names in *D. melanogaster*.

1109

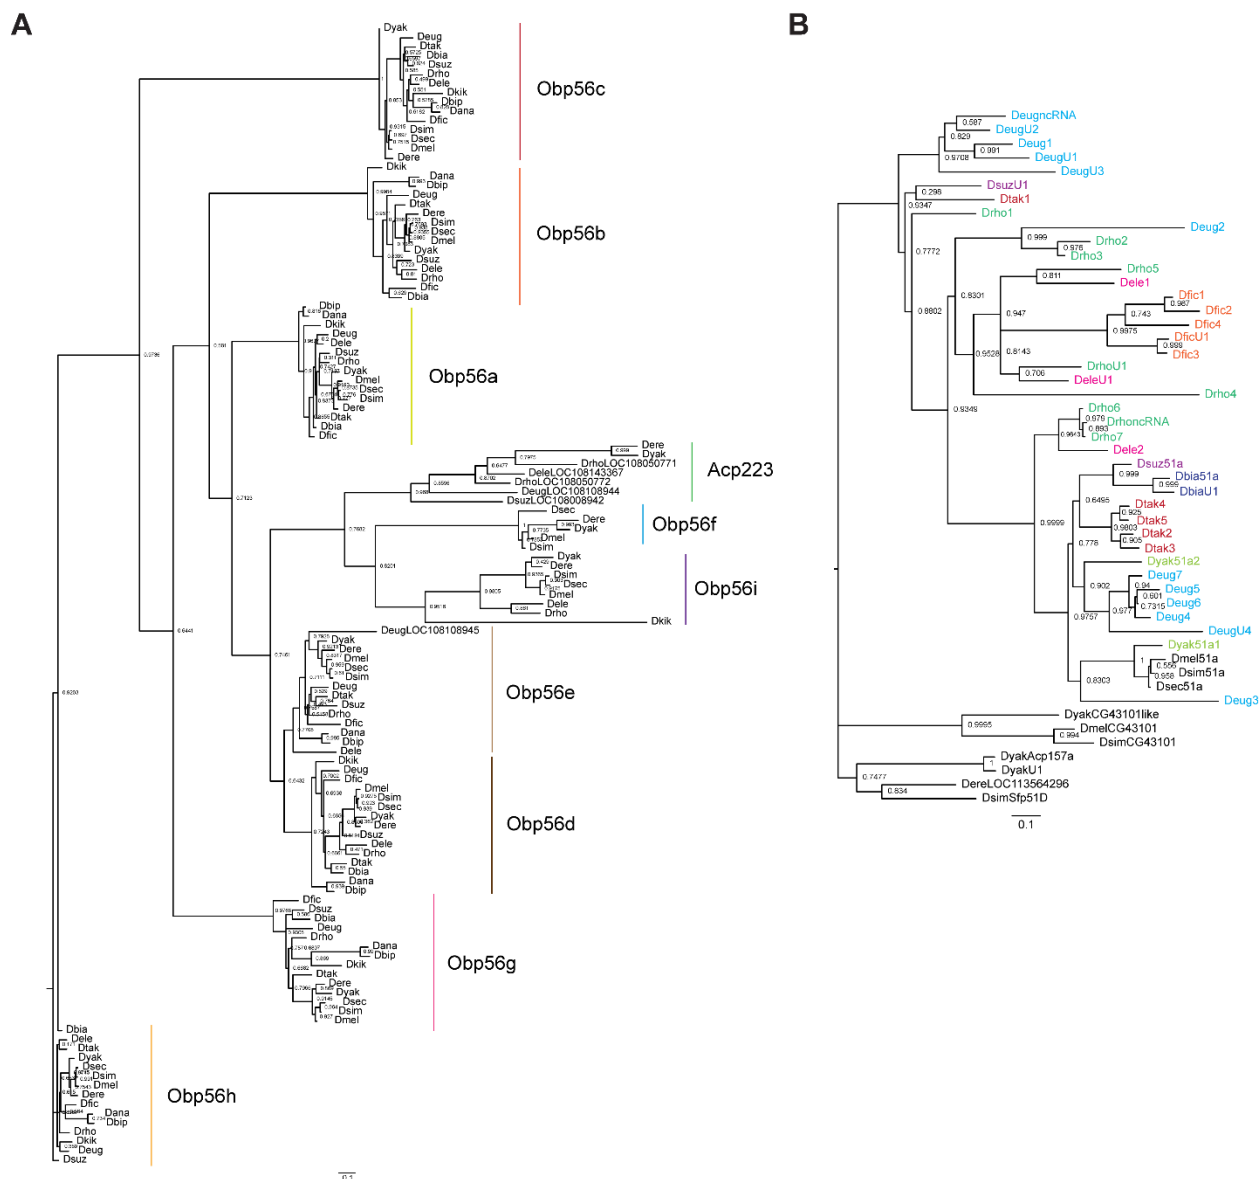

1110  
 1111 **Figure 5—figure supplement 7:** RAXML-NG maximum likelihood inferred trees for genes in  
 1112 the A) *Obp56* cluster across *melanogaster* group species, or B) *Obp51a* cluster, where genes  
 1113 are colored as in Figure 5—figure supplement 1. Node values are bootstrap support estimates  
 1114 based on 1,000 replicates. *CG43101* is a gene located next to *Obp51a* in *D. melanogaster*,  
 1115 which has 6 cysteines in a pattern reminiscent of the *Obp* “domain” but is not a predicted *Obp*  
 1116 based on InterProScan searches.  
 1117



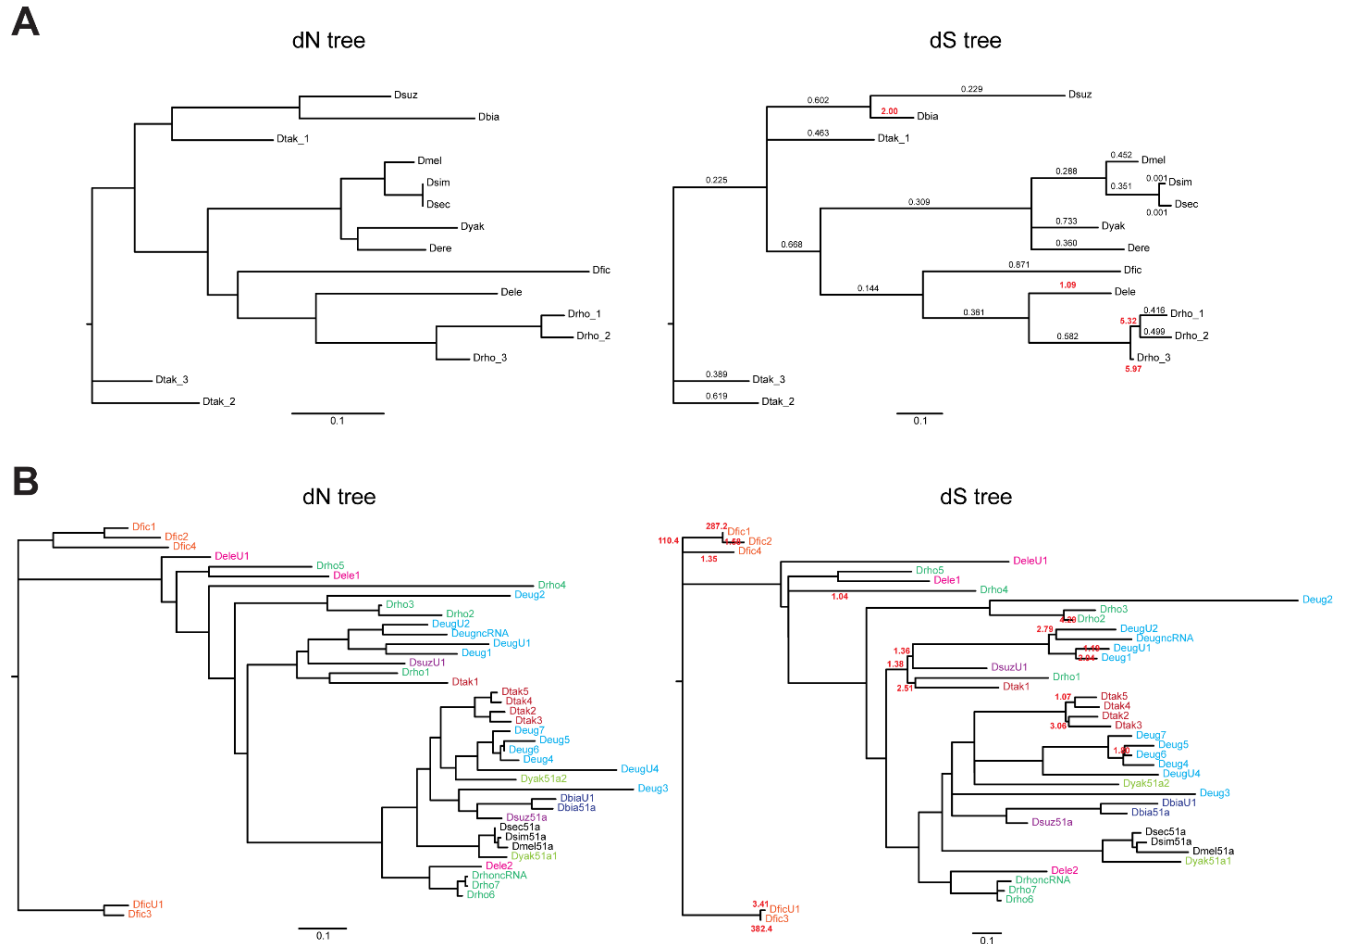

1118

1119 **Figure 5—figure supplement 8:** A) *Obp22a* and B) *Obp51a* maximum likelihood inferred gene  
 1120 trees, where branch lengths are proportional to either estimates of dN (left) or dS (right) from  
 1121 PAML. Values indicated on the dS tree represent ML-inferred estimates of  $\omega$  from PAML's free  
 1122 ratio model, where the value is bold and red if  $\omega > 1$ . Values on the *Obp51a* dS tree are only  
 1123 shown if  $\omega > 1$  for clarity. Genes in B) are color-coded by species if more than one paralog is  
 1124 present in that species' genomes.

1125

1126

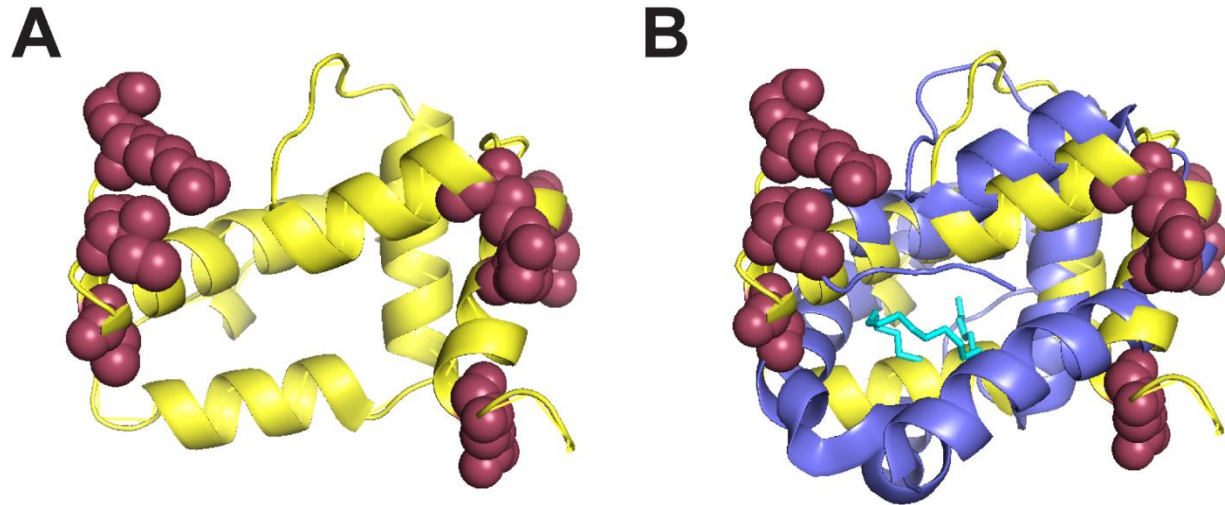

1127

1128 **Figure 5—figure supplement 9:** Positively selected sites in *Obp22a* cluster on the outward-  
1129 facing region of the protein. A) AlphaFold predicted protein structure (yellow) of *Obp22a* with the  
1130 positively selected sites ( $Pr > 0.90$  BEB from model M8 of PAML) shown in maroon (Jumper et  
1131 al., 2021). B) The same structure as A with a superimposed alignment of the crystal structure of  
1132 *Obp76a* (LUSH) from (Laughlin et al., 2008), (purple). The cyan molecule represents cVA and  
1133 the inferred region of the binding pocket.

1134

1135

1136

1137

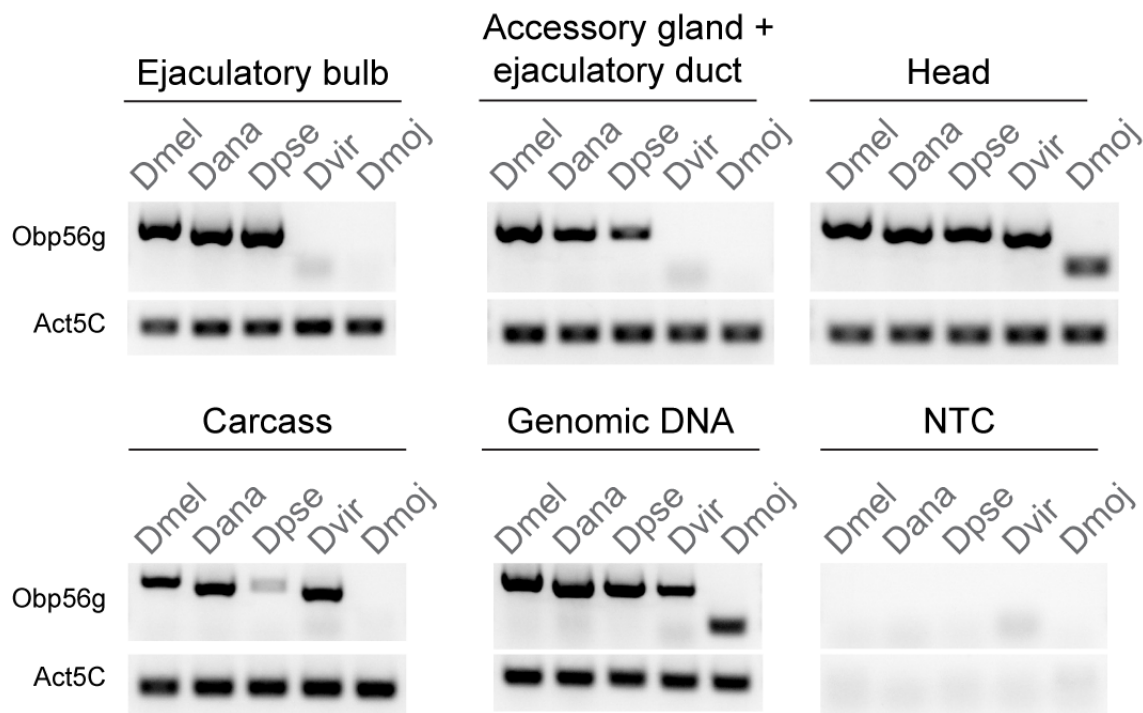

1138  
 1139 **Figure 6—figure supplement 1:** Semi-quantitative RT-PCR data from dissected tissues (head,  
 1140 accessory gland + ejaculatory duct, ejaculatory bulb, and carcass) from *D. melanogaster*  
 1141 (*Dmel*), *D. ananassae* (*Dana*), *D. pseudoobscura* (*Dpse*), *D. virilis* (*Dvir*), and *D. mojavensis*  
 1142 (*Dmoj*) males after 35 cycles of PCR. NTC = no template control.

1143  
 1144 Figure 6—figure supplement 1—source data 1: raw and uncropped, labeled gel images for data  
 1145 shown in Figure 6—figure supplement 1.

1146  
 1147 **Supplementary tables:**

1148

| Gene          | gRNA sequence (5'->3')                                                         |
|---------------|--------------------------------------------------------------------------------|
| <i>Obp8a</i>  | 1: GGTGAGGATCGCATGGGCAC<br>2: GCTGGACAGGATGCAGTTCG<br>3: ACATGTCCGATGTCATCAAT  |
| <i>Obp22a</i> | 1: AATTGTAAGCGAGTGTGCCA<br>2: GAACAATGTTTCATAGGAAGA<br>3: AAAGTGAGGGGGATAGATAG |

|                                                     |                                                                                |
|-----------------------------------------------------|--------------------------------------------------------------------------------|
| <i>Obp51a</i>                                       | 1: TGACAGCTAACAAACAGAACC<br>2: GAACGAATGTGCTAAAAAAC<br>3: TAAATTCTCGTTTCAAGCAC |
| <i>Obp56e</i>                                       | 1: TGAGGCTAAGCAGAGAGCCA<br>2: CAAGCTATTGCCCTGCGGTC<br>3: GCCAAGTGTGACTCGACCAA  |
| <i>Obp56f</i>                                       | 1: AGCCTGCTTGAAACGGCAGC<br>2: CACTGCTTACTGGAAGTGAA<br>3: ATGTTTAGAAGTCTAATGCT  |
| <i>Obp56g</i>                                       | 1: GCAAGCCAACATAGACAGTT<br>2: CGGTGTCACTCCCCAGGATC<br>3: CGGATCGTTAAGACCCTAAT  |
| <i>Obp56i</i>                                       | 1: GGTACAAGCAGGTCCCATTA<br>2: CGTCATGAGACCGACGACCC<br>3: CGAAGAACTCGAAATCACAG  |
| <i>ebony</i> (gRNA sequence from Kane et al., 2017) | GCCACAATTGTGCGATCGTCA                                                          |

1149

1150 **Table S1:** gRNA sequences from flyCRISPR's Optimal Target Finder tool for each *Obp* gene.

1151

| Primer    | Primer Sequence (5' -> 3')                                                |                                |
|-----------|---------------------------------------------------------------------------|--------------------------------|
| Primer 1F | TTCCCGGCCGATGCAnnnnnnnnnnnnnnnnnnnnnGTTT <sub>a</sub> AGAGCTAtgctgGAAAcag | n: 20nt<br>gRNA 1              |
| Primer 1R | nnnnnnnnnnnnnnnnnnnnnnTGCACCAGCCGGAATC                                    | n: 20nt<br>gRNA 2<br>(RevComp) |
| Primer 2F | nnnnnnnnnnnnnnnnnnnnnnGTTT <sub>a</sub> AGAGCTAtgctgGAAAcag               | n: 20nt<br>gRNA 2              |

|           |                                                            |                                |
|-----------|------------------------------------------------------------|--------------------------------|
| Primer 2R | nnnnnnnnnnnnnnnnnnnnnnTGCACCAGCCGGAATC                     | n: 20nt<br>gRNA 3<br>(RevComp) |
| Primer 3F | nnnnnnnnnnnnnnnnnnnnnnGTTTtaAGAGCTAtgctgGAAAcag            | n: 20nt<br>gRNA 3              |
| Primer 3R | TTCcagcaTAGCTCTtAAACnnnnnnnnnnnnnnnnnnnnnnTGCACCAGCCGGAATC | n: 20nt<br>gRNA 4<br>(RevComp) |

1152

1153 **Table S2:** Primer sequences for cloning gRNAs from Table S1 into pAC-U63-tgRNA-Rev using

1154 pMGC as a PCR template (from Poe et al., 2018).

1155

| Gene          | Primer sequence (5' -> 3')                                                                                              | Purpose of primer pair                       |
|---------------|-------------------------------------------------------------------------------------------------------------------------|----------------------------------------------|
| <i>Obp8a</i>  | 0F: TCGTAGGTCAGCAGCCCATTAC<br>0R: TCGCATATGACTTTCAATCCGTGT<br>1F: CGTGGGAATGATGCGGAGA<br>1R: CATGGGCAGCATCCTCGAAT       | 0: Sequencing CRISPR<br>mutants<br>1: RT-PCR |
| <i>Obp22a</i> | 2F: CCACTTTGTATTGGCAACCGCA<br>2R: CAGTCCGCCCAACTTTGAGTTT<br>3F: TGACTTCTGCTTGGCCTCTC<br>3R: TTTTGGAAGGATTCTGCACAC       | 2: Sequencing CRISPR<br>mutants<br>3: RT-PCR |
| <i>Obp51a</i> | 4F: AGCAATCTCCCTCACGTGATAT<br>4R: TGCGGCGCTCATGTTTCTTTTA<br>5F: GGCCTGGTTCTGTTGTTAGC<br>5R: TCAAGCACTGGAACACCAAG        | 4: Sequencing CRISPR<br>mutants<br>5: RT-PCR |
| <i>Obp56e</i> | 6F:<br>ACCTGACAACAAGAAATAACCCGC<br>6R: CACTAGAGCAAGCGTTCGGTTC<br>7F: CCCTTGACAGCTCTATCTTTGG<br>7R: CTTGGTCGAGTCACACTTGG | 6: Sequencing CRISPR<br>mutants<br>7: RT-PCR |

|                                |                                                                                                                        |                                             |
|--------------------------------|------------------------------------------------------------------------------------------------------------------------|---------------------------------------------|
| <i>Obp56f</i>                  | 8F: GGTAACAGTCCCTGGAAACCGA<br>8R: GCGCTTTGCCCGGAATAATCTT<br>9F: TTCATTTTCATCTCTGCTATCTGG<br>9R: GCCCAATTCACATTTTCCTG   | 8: Sequencing CRISPR mutants<br>9: RT-PCR   |
| <i>Obp56g</i>                  | 10F: GTTAGAAACCTTGACAGTGGCA<br>10R: ATGGGGTAGGCAGTGTATCCCT<br>11F: AGGGCTACATTTCGCATTGAC<br>11R: ACCTGTCCAAATCCTTTTCG  | 10: Sequencing CRISPR mutants<br>11: RT-PCR |
| <i>Obp56i</i>                  | 12F: ACCTCCATTCGGGTATCTCGAC<br>12R: GACTGAGTGATGCAAAGCACGT<br>13F: TGCTGTGCATTATTGTTAGTCG<br>13R: ACTCGTCATGGGATGTCTCG | 12: Sequencing CRISPR mutants<br>13: RT-PCR |
| <i>Actin 5C</i>                | F: AGCGCGGTTACTCTTTCACCAC<br>R: GTGGCCATCTCCTGCTCAAAGT                                                                 | RT-PCR control gene                         |
| <i>D. ananassae Obp56g</i>     | F: TGACTCTGCTGCTTAGCTGC<br>R: GATCCTTGTCACCTGAGCC                                                                      |                                             |
| <i>D. pseudoobscura Obp56g</i> | F: GGAGCCGGAGACATAAGCAA<br>R: GCAGGTTTCCTTTTCGCATCC                                                                    |                                             |
| <i>D. mojavensis Obp56g</i>    | F: AGAAGCCCGAAATGACCCAG<br>R: CTCCAGCTTCACCTCACCAG                                                                     |                                             |
| <i>D. virilis Obp56g</i>       | F: GCTGCTTCTCGGCTGTCTAA<br>R: CCTTAGCTGGCGCATCCTTA                                                                     |                                             |

1156

1157 **Table S3:** Primer sequences used in this study.

1158

| Gene         | Allele designation           | Mutant allele description                                                         |
|--------------|------------------------------|-----------------------------------------------------------------------------------|
| <i>Obp8a</i> | <i>Obp8a</i> <sup>Δ390</sup> | 390 bp deletion in exon 2 between gRNA 1 + 3 (95% of non-signal peptide sequence) |

|               |                               |                                                                                                                            |
|---------------|-------------------------------|----------------------------------------------------------------------------------------------------------------------------|
| <i>Obp22a</i> | <i>Obp22a</i> <sup>Δ257</sup> | 257 bp deletion in exon 2 between gRNA 1 + 3 (86% of non-signal peptide sequence)                                          |
| <i>Obp51a</i> | <i>Obp51a</i> <sup>Δ16</sup>  | 16 bp deletion in middle of signal peptide region of exon 1 within gRNA 1 site (predicted frameshift and early stop codon) |
| <i>Obp56e</i> | <i>Obp56e</i> <sup>Δ239</sup> | 239 bp deletion in exon 2 between gRNA 1 + 3 (69% of non-signal peptide sequence)                                          |
| <i>Obp56f</i> | <i>Obp56f</i> <sup>Δ226</sup> | 226 bp deletion in exon 2 between gRNA 2 + 3 (67% of non-signal peptide sequence + 13 bp into 3' UTR)                      |
| <i>Obp56g</i> | <i>Obp56g</i> <sup>Δ333</sup> | 333 bp deletion in exon 2 between gRNA 1 + 3 (95% of non-signal peptide sequence + 7 bp into 3' UTR)                       |
| <i>Obp56i</i> | <i>Obp56i</i> <sup>Δ359</sup> | 359 bp deletion in exon 2 between gRNA 1 + 3 (98% of non-signal peptide sequence)                                          |

1159

1160 **Table S4:** CRISPR mutant allele summary for each *Obp* gene.

1161

| <b>Gene</b>   | <b>4-day receptivity</b>   | <b>BH-adjusted <i>p</i>-value</b> |
|---------------|----------------------------|-----------------------------------|
| <i>Obp8a</i>  | KO: 2/17<br>Control: 10/18 | 0.069                             |
| <i>Obp22a</i> | KO: 1/15<br>Control: 0/19  | 1                                 |
| <i>Obp51a</i> | KO: 3/19<br>Control: 1/15  | 1                                 |
| <i>Obp56e</i> | KO: 0/17<br>Control: 1/19  | 1                                 |
| <i>Obp56f</i> | KO: 3/18<br>Control: 4/15  | 1                                 |
| <i>Obp56i</i> | KO: 1/17<br>Control: 3/14  | 0.912                             |

1162

1163 **Table S5:** Four-day receptivity data from an additional replicate using CRISPR mutant males of  
 1164 the genotypes indicated.  
 1165

| Gene          | Male genotype                              | % CS females with mating plugs present after copulation |
|---------------|--------------------------------------------|---------------------------------------------------------|
| <i>Obp8a</i>  | <i>Obp8a</i> <sup>Δ390</sup>               | 100% (n=7)                                              |
|               | <i>Obp8a</i> <sup>WT</sup>                 | 100% (n=9)                                              |
| <i>Obp22a</i> | <i>Obp22a</i> <sup>Δ257</sup>              | 100% (n=8)                                              |
|               | <i>Obp22a</i> <sup>Δ257</sup> / <i>CyO</i> | 100% (n=9)                                              |
| <i>Obp51a</i> | <i>Obp51a</i> <sup>Δ16</sup>               | 100% (n=8)                                              |
|               | <i>Obp51a</i> <sup>Δ16</sup> / <i>CyO</i>  | 100% (n=8)                                              |
| <i>Obp56e</i> | <i>Obp56e</i> <sup>Δ239</sup>              | 100% (n=8)                                              |
|               | <i>Obp56e</i> <sup>Δ239</sup> / <i>CyO</i> | 100% (n=9)                                              |
| <i>Obp56f</i> | <i>Obp56f</i> <sup>Δ226</sup>              | 90% (n=10)                                              |
|               | <i>Obp56f</i> <sup>Δ226</sup> / <i>CyO</i> | 100% (n=10)                                             |
| <i>Obp56g</i> | <i>Obp56g</i> <sup>Δ333</sup>              | 0% (n=14)                                               |
|               | <i>Obp56g</i> <sup>Δ333</sup> / <i>CyO</i> | 100% (n=11)                                             |
| <i>Obp56i</i> | <i>Obp56i</i> <sup>Δ359</sup>              | 100% (n=10)                                             |
|               | <i>Obp56i</i> <sup>Δ359</sup> / <i>CyO</i> | 100% (n=10)                                             |

1166  
 1167 **Table S6:** Proportion of CS females mated to CRISPR mutant males with morphologically  
 1168 normal mating plugs assessed immediately after the end of mating.

1169  
 1170 **Supplemental methods:**

1171 To build our gRNA-expressing vectors, we used pAC-U63-tgRNA-Rev, a plasmid that  
 1172 expresses multiplexed gRNAs separated by rice Gly tRNA sequences, as well as the (F+E)



1173 gRNA scaffold, under the control of the *Drosophila* U6:3 promoter (Poe et al., 2018). We  
1174 designed Gibson assembly primers containing our gRNA sequences according to (Poe et al.,  
1175 2018, Table S2). We used these primers to generate PCR products using the pMGC template  
1176 vector and purified products of the correct size using a gel extraction kit (Poe et al., 2018,  
1177 Zymo). The empty pAC-U63-tgRNA-Rev plasmid was digested using *SapI*, and the digested  
1178 vector and purified PCR products were assembled using the HiFi assembly kit (NEB,  
1179 NEBuilder). The pAC-U63-tgRNA-Rev and pMGC plasmids were generous gifts from Chun Han  
1180 at Cornell University.

1181

1182 **References:**

- 1183 Ahmed-Braimah YH, Unckless RL, Clark AG. 2017. Evolutionary Dynamics of Male  
1184 Reproductive Genes in the *Drosophila virilis* Subgroup. *G3 Bethesda Md* **7**:3145–3155.  
1185 doi:10.1534/g3.117.1136
- 1186 Ai M, Min S, Grosjean Y, Leblanc C, Bell R, Benton R, Suh GSB. 2010. Acid sensing by the  
1187 *Drosophila* olfactory system. *Nature* **468**:691–695. doi:10.1038/nature09537
- 1188 Alonso-Pimentel H, Tolbert LP, Heed WB. 1994. Ultrastructural examination of the insemination  
1189 reaction in *Drosophila*. *Cell Tissue Res* **275**:467–479. doi:10.1007/BF00318816
- 1190 Avila FW, Cohen AB, Ameerudeen FS, Duneau D, Suresh S, Mattei AL, Wolfner MF. 2015.  
1191 Retention of Ejaculate by *Drosophila melanogaster* Females Requires the Male-Derived  
1192 Mating Plug Protein PEBme. *Genetics* **200**:1171–1179.  
1193 doi:10.1534/genetics.115.176669
- 1194 Avila FW, Sirot LK, LaFlamme BA, Rubinstein CD, Wolfner MF. 2011. Insect Seminal Fluid  
1195 Proteins: Identification and Function. *Annu Rev Entomol* **56**:21–40. doi:10.1146/annurev-  
1196 ento-120709-144823
- 1197 Avila FW, Wolfner MF. 2009. Acp36DE is required for uterine conformational changes in mated  
1198 *Drosophila* females. *Proc Natl Acad Sci U S A* **106**:15796–15800.  
1199 doi:10.1073/pnas.0904029106
- 1200 Baer B, Zareie R, Paynter E, Poland V, Millar AH. 2012. Seminal fluid proteins differ in  
1201 abundance between genetic lineages of honeybees. *J Proteomics* **75**:5646–5653.  
1202 doi:10.1016/j.jprot.2012.08.002
- 1203 Bates D, Mächler M, Bolker B, Walker S. 2015. Fitting Linear Mixed-Effects Models Using lme4.  
1204 *J Stat Softw* **67**. doi:10.18637/jss.v067.i01

- 1205 Begun DJ, Lindfors HA. 2005. Rapid Evolution of Genomic Acp Complement in the  
1206 melanogaster Subgroup of *Drosophila*. *Mol Biol Evol* **22**:2010–2021.  
1207 doi:10.1093/molbev/msi201
- 1208 Begun DJ, Lindfors HA, Thompson ME, Holloway AK. 2006. Recently Evolved Genes Identified  
1209 From *Drosophila yakuba* and *D. erecta* Accessory Gland Expressed Sequence Tags.  
1210 *Genetics* **172**:1675–1681. doi:10.1534/genetics.105.050336
- 1211 Benjamini Y, Hochberg Y. 1995. Controlling the False Discovery Rate: A Practical and Powerful  
1212 Approach to Multiple Testing. *J R Stat Soc Ser B Methodol* **57**:289–300.
- 1213 Benoit JB, Vigneron A, Broderick NA, Wu Y, Sun JS, Carlson JR, Aksoy S, Weiss BL. 2017.  
1214 Symbiont-induced odorant binding proteins mediate insect host hematopoiesis. *eLife*  
1215 **6**:e19535. doi:10.7554/eLife.19535
- 1216 Bertram MJ, Neubaum DM, Wolfner MF. 1996. Localization of the *Drosophila* male accessory  
1217 gland protein Acp36DE in the mated female suggests a role in sperm storage. *Insect*  
1218 *Biochem Mol Biol* **26**:971–980. doi:10.1016/S0965-1748(96)00064-1
- 1219 Billeter J-C, Levine J. 2015. The role of cVA and the Odorant binding protein Lush in social and  
1220 sexual behavior in *Drosophila melanogaster*. *Front Ecol Evol* **3**.
- 1221 Billeter J-C, Wolfner MF. 2018. Chemical Cues that Guide Female Reproduction in *Drosophila*  
1222 *melanogaster*. *J Chem Ecol* **44**:750–769. doi:10.1007/s10886-018-0947-z
- 1223 Birchler JA, Yang H. 2022. The multiple fates of gene duplications: Deletion,  
1224 hypofunctionalization, subfunctionalization, neofunctionalization, dosage balance  
1225 constraints, and neutral variation. *Plant Cell* **34**:2466–2474. doi:10.1093/plcell/koac076
- 1226 Bretman A, Lawniczak MKN, Boone J, Chapman T. 2010. A mating plug protein reduces early  
1227 female remating in *Drosophila melanogaster*. *J Insect Physiol* **56**:107–113.  
1228 doi:10.1016/j.jinsphys.2009.09.010
- 1229 Brieger G, Butterworth FM. 1970. *Drosophila melanogaster*: Identity of Male Lipid in  
1230 Reproductive System. *Science* **167**:1262–1262. doi:10.1126/science.167.3922.1262
- 1231 Carlisle JA, Glenski MA, Swanson WJ. 2022. Recurrent Duplication and Diversification of  
1232 Acrosomal Fertilization Proteins in Abalone. *Front Cell Dev Biol* **10**:795273.  
1233 doi:10.3389/fcell.2022.795273
- 1234 Cavener DR. 1985. Coevolution of the glucose dehydrogenase gene and the ejaculatory duct in  
1235 the genus *Drosophila*. *Mol Biol Evol* **2**:141–149.  
1236 doi:10.1093/oxfordjournals.molbev.a040344
- 1237 Chang C-H, Malik HS. 2022. Genetic conflicts between sex chromosomes drive expansion and  
1238 loss of sperm nuclear basic protein genes in *Drosophila*. doi:10.1101/2022.06.08.495379

- 1239 Chen DS, Delbare SYN, White SL, Sitnik J, Chatterjee M, DoBell E, Weiss O, Clark AG, Wolfner  
1240 MF. 2019. Female Genetic Contributions to Sperm Competition in *Drosophila*  
1241 *melanogaster*. *Genetics* **212**:789–800. doi:10.1534/genetics.119.302284
- 1242 Chin JS, Ellis SR, Pham HT, Blanksby SJ, Mori K, Koh QL, Etges WJ, Yew JY. 2014. Sex-  
1243 specific triacylglycerides are widely conserved in *Drosophila* and mediate mating  
1244 behavior. *eLife* **3**:e01751. doi:10.7554/eLife.01751
- 1245 Cohen AB, Wolfner MF. 2018. Dynamic changes in ejaculatory bulb size during *Drosophila*  
1246 *melanogaster* aging and mating. *J Insect Physiol* **107**:152–156.  
1247 doi:10.1016/j.jinsphys.2018.04.005
- 1248 Cook RK, Christensen SJ, Deal JA, Coburn RA, Deal ME, Gresens JM, Kaufman TC, Cook KR.  
1249 2012. The generation of chromosomal deletions to provide extensive coverage and  
1250 subdivision of the *Drosophila melanogaster* genome. *Genome Biol* **13**:R21.  
1251 doi:10.1186/gb-2012-13-3-r21
- 1252 *Drosophila* 12 Genomes Consortium, Clark AG, Eisen MB, Smith DR, Bergman CM, Oliver B,  
1253 Markow TA, Kaufman TC, Kellis M, Gelbart W, Iyer VN, Pollard DA, Sackton TB,  
1254 Larracuente AM, Singh ND, Abad JP, Abt DN, Adryan B, Aguade M, Akashi H, Anderson  
1255 WW, Aquadro CF, Ardell DH, Arguello R, Artieri CG, Barbash DA, Barker D, Barsanti P,  
1256 Batterham P, Batzoglou S, Begun D, Bhutkar A, Blanco E, Bosak SA, Bradley RK, Brand  
1257 AD, Brent MR, Brooks AN, Brown RH, Butlin RK, Caggese C, Calvi BR, Bernardo de  
1258 Carvalho A, Caspi A, Castrezana S, Celniker SE, Chang JL, Chapple C, Chatterji S,  
1259 Chinwalla A, Civetta A, Clifton SW, Comeron JM, Costello JC, Coyne JA, Daub J, David  
1260 RG, Delcher AL, Delehaunty K, Do CB, Ebling H, Edwards K, Eickbush T, Evans JD,  
1261 Filipowski A, Findeiss S, Freyhult E, Fulton L, Fulton R, Garcia ACL, Gardiner A, Garfield  
1262 DA, Garvin BE, Gibson G, Gilbert D, Gnerre S, Godfrey J, Good R, Gotea V, Gravely B,  
1263 Greenberg AJ, Griffiths-Jones S, Gross S, Guigo R, Gustafson EA, Haerty W, Hahn  
1264 MW, Halligan DL, Halpern AL, Halter GM, Han MV, Heger A, Hillier L, Hinrichs AS,  
1265 Holmes I, Hoskins RA, Hubisz MJ, Hultmark D, Huntley MA, Jaffe DB, Jagadeeshan S,  
1266 Jeck WR, Johnson J, Jones CD, Jordan WC, Karpen GH, Kataoka E, Keightley PD,  
1267 Kheradpour P, Kirkness EF, Koerich LB, Kristiansen K, Kudrna D, Kulathinal RJ, Kumar  
1268 S, Kwok R, Lander E, Langley CH, Lapoint R, Lazzaro BP, Lee S-J, Levesque L, Li R,  
1269 Lin C-F, Lin MF, Lindblad-Toh K, Llopart A, Long M, Low L, Lozovsky E, Lu J, Luo M,  
1270 Machado CA, Makalowski W, Marzo M, Matsuda M, Matzkin L, McAllister B, McBride  
1271 CS, McKernan B, McKernan K, Mendez-Lago M, Minx P, Mollenhauer MU, Montooth K,  
1272 Mount SM, Mu X, Myers E, Negre B, Newfeld S, Nielsen R, Noor MAF, O'Grady P,

1273 Pachter L, Papaceit M, Parisi MJ, Parisi M, Parts L, Pedersen JS, Pesole G, Phillippy  
1274 AM, Ponting CP, Pop M, Porcelli D, Powell JR, Prohaska S, Pruitt K, Puig M,  
1275 Quesneville H, Ram KR, Rand D, Rasmussen MD, Reed LK, Reenan R, Reily A,  
1276 Remington KA, Rieger TT, Ritchie MG, Robin C, Rogers Y-H, Rohde C, Rozas J,  
1277 Rubenfield MJ, Ruiz A, Russo S, Salzberg SL, Sanchez-Gracia A, Saranga DJ, Sato H,  
1278 Schaeffer SW, Schatz MC, Schlenke T, Schwartz R, Segarra C, Singh RS, Sirot L,  
1279 Sirota M, Sisneros NB, Smith CD, Smith TF, Spieth J, Stage DE, Stark A, Stephan W,  
1280 Strausberg RL, Strempel S, Sturgill D, Sutton G, Sutton GG, Tao W, Teichmann S,  
1281 Tobar YN, Tomimura Y, Tsolas JM, Valente VLS, Venter E, Venter JC, Vicario S, Vieira  
1282 FG, Vilella AJ, Villasante A, Walenz B, Wang J, Wasserman M, Watts T, Wilson D,  
1283 Wilson RK, Wing RA, Wolfner MF, Wong A, Wong GK-S, Wu C-I, Wu G, Yamamoto D,  
1284 Yang H-P, Yang S-P, Yorke JA, Yoshida K, Zdobnov E, Zhang P, Zhang Y, Zimin AV,  
1285 Baldwin J, Abdouelleil A, Abdulkadir J, Abebe A, Abera B, Abreu J, Acer SC, Aftuck L,  
1286 Alexander A, An P, Anderson E, Anderson S, Arachi H, Azer M, Bachantsang P, Barry  
1287 A, Bayul T, Berlin A, Bessette D, Bloom T, Blye J, Boguslavskiy L, Bonnet C,  
1288 Boukhgalter B, Bourzgui I, Brown A, Cahill P, Channer S, Cheshatsang Y, Chuda L,  
1289 Citroen M, Collymore A, Cooke P, Costello M, D'Aco K, Daza R, De Haan G, DeGray S,  
1290 DeMaso C, Dhargay N, Dooley K, Dooley E, Doricent M, Dorje P, Dorjee K, Dupes A,  
1291 Elong R, Falk J, Farina A, Faro S, Ferguson D, Fisher S, Foley CD, Franke A, Friedrich  
1292 D, Gadbois L, Gearin G, Gearin CR, Giannoukos G, Goode T, Graham J, Grandbois E,  
1293 Grewal S, Gyaltzen K, Hafez N, Hagos B, Hall J, Henson C, Hollinger A, Honan T,  
1294 Huard MD, Hughes L, Hurhula B, Husby ME, Kamat A, Kanga B, Kashin S, Khazanovich  
1295 D, Kisner P, Lance K, Lara M, Lee W, Lennon N, Letendre F, LeVine R, Lipovsky A, Liu  
1296 X, Liu J, Liu S, Lokyitsang T, Lokyitsang Y, Lubonja R, Lui A, MacDonald P, Magnisalis  
1297 V, Maru K, Matthews C, McCusker W, McDonough S, Mehta T, Meldrim J, Meneus L,  
1298 Mihai O, Mihalev A, Mihova T, Mittelman R, Mlenga V, Montmayeur A, Mulrain L, Navidi  
1299 A, Naylor J, Negash T, Nguyen T, Nguyen N, Nicol R, Norbu C, Norbu N, Novod N,  
1300 O'Neill B, Osman S, Markiewicz E, Oyono OL, Patti C, Phunkhang P, Pierre F, Priest M,  
1301 Raghuraman S, Rege F, Reyes R, Rise C, Rogov P, Ross K, Ryan E, Settipalli S, Shea  
1302 T, Sherpa N, Shi L, Shih D, Sparrow T, Spaulding J, Stalker J, Stange-Thomann N,  
1303 Stavropoulos S, Stone C, Strader C, Tesfaye S, Thomson T, Thoulutsang Y,  
1304 Thoulutsang D, Topham K, Topping I, Tsamla T, Vassiliev H, Vo A, Wangchuk T,  
1305 Wangdi T, Weiland M, Wilkinson J, Wilson A, Yadav S, Young G, Yu Q, Zembek L,  
1306 Zhong D, Zimmer A, Zwirko Z, Jaffe DB, Alvarez P, Brockman W, Butler J, Chin C,

- 1307 Gnerre S, Grabherr M, Kleber M, Mauceli E, MacCallum I. 2007. Evolution of genes and  
1308 genomes on the *Drosophila* phylogeny. *Nature* **450**:203–218. doi:10.1038/nature06341
- 1309 Edgar RC. 2004. MUSCLE: multiple sequence alignment with high accuracy and high  
1310 throughput. *Nucleic Acids Res* **32**:1792–1797. doi:10.1093/nar/gkh340
- 1311 Everaerts C, Farine J-P, Cobb M, Ferveur J-F. 2010. *Drosophila* Cuticular Hydrocarbons  
1312 Revisited: Mating Status Alters Cuticular Profiles. *PLOS ONE* **5**:e9607.  
1313 doi:10.1371/journal.pone.0009607
- 1314 Findlay GD, MacCoss MJ, Swanson WJ. 2009. Proteomic discovery of previously unannotated,  
1315 rapidly evolving seminal fluid genes in *Drosophila*. *Genome Res* **19**:886–896.  
1316 doi:10.1101/gr.089391.108
- 1317 Findlay GD, Sitnik JL, Wang W, Aquadro CF, Clark NL, Wolfner MF. 2014. Evolutionary Rate  
1318 Covariation Identifies New Members of a Protein Network Required for *Drosophila*  
1319 *melanogaster* Female Post-Mating Responses. *PLoS Genet* **10**:e1004108.  
1320 doi:10.1371/journal.pgen.1004108
- 1321 Findlay GD, Yi X, MacCoss MJ, Swanson WJ. 2008. Proteomics Reveals Novel *Drosophila*  
1322 Seminal Fluid Proteins Transferred at Mating. *PLOS Biol* **6**:e178.  
1323 doi:10.1371/journal.pbio.0060178
- 1324 Galindo K, Smith DP. 2001. A large family of divergent *Drosophila* odorant-binding proteins  
1325 expressed in gustatory and olfactory sensilla. *Genetics* **159**:1059–1072.  
1326 doi:10.1093/genetics/159.3.1059
- 1327 Garlovsky MD, Evans C, Rosenow MA, Karr TL, Snook RR. 2020. Seminal fluid protein  
1328 divergence among populations exhibiting postmating prezygotic reproductive isolation.  
1329 *Mol Ecol* **29**:4428–4441. doi:10.1111/mec.15636
- 1330 Gilchrist AS, Partridge L. 2000. Why it is difficult to model sperm displacement in *Drosophila*  
1331 *melanogaster*: the relation between sperm transfer and copulation duration. *Evol Int J*  
1332 *Org Evol* **54**:534–542. doi:10.1111/j.0014-3820.2000.tb00056.x
- 1333 Gomez-Diaz C, Reina JH, Cambillau C, Benton R. 2013. Ligands for Pheromone-Sensing  
1334 Neurons Are Not Conformationally Activated Odorant Binding Proteins. *PLOS Biol*  
1335 **11**:e1001546. doi:10.1371/journal.pbio.1001546
- 1336 Gratz SJ, Ukken FP, Rubinstein CD, Thiede G, Donohue LK, Cummings AM, O'Connor-Giles  
1337 KM. 2014. Highly Specific and Efficient CRISPR/Cas9-Catalyzed Homology-Directed  
1338 Repair in *Drosophila*. *Genetics* **196**:961–971. doi:10.1534/genetics.113.160713

- 1339 Guiraudie-Capraz G, Pho DB, Jallon J-M. 2007. Role of the ejaculatory bulb in biosynthesis of  
1340 the male pheromone cis-vaccenyl acetate in *Drosophila melanogaster*. *Integr Zool* **2**:89–  
1341 99. doi:10.1111/j.1749-4877.2007.00047.x
- 1342 Ha TS, Smith DP. 2006. A Pheromone Receptor Mediates 11-cis-Vaccenyl Acetate-Induced  
1343 Responses in *Drosophila*. *J Neurosci* **26**:8727–8733. doi:10.1523/JNEUROSCI.0876-  
1344 06.2006
- 1345 Haerty W, Jagadeeshan S, Kulathinal RJ, Wong A, Ravi Ram K, Sirot LK, Levesque L, Artieri  
1346 CG, Wolfner MF, Civetta A, Singh RS. 2007. Evolution in the Fast Lane: Rapidly  
1347 Evolving Sex-Related Genes in *Drosophila*. *Genetics* **177**:1321–1335.  
1348 doi:10.1534/genetics.107.078865
- 1349 Hallem EA, Carlson JR. 2006. Coding of Odors by a Receptor Repertoire. *Cell* **125**:143–160.  
1350 doi:10.1016/j.cell.2006.01.050
- 1351 Han C, Jan LY, Jan Y-N. 2011. Enhancer-driven membrane markers for analysis of  
1352 nonautonomous mechanisms reveal neuron–glia interactions in *Drosophila*. *Proc Natl*  
1353 *Acad Sci U S A* **108**:9673–9678. doi:10.1073/pnas.1106386108
- 1354 Hekmat-Safe DS, Safe CR, McKinney AJ, Tanouye MA. 2002. Genome-Wide Analysis of the  
1355 Odorant-Binding Protein Gene Family in *Drosophila melanogaster*. *Genome Res*  
1356 **12**:1357–1369. doi:10.1101/gr.239402
- 1357 Hoffman P. 2022. SeuratDisk: Interfaces for HDF5-Based Single Cell File Formats.
- 1358 James D, Hornik K. 2022. chron: Chronological Objects which can Handle Dates and Times.
- 1359 Jenett A, Rubin GM, Ngo T-TB, Shepherd D, Murphy C, Dionne H, Pfeiffer BD, Cavallaro A, Hall  
1360 D, Jeter J, Iyer N, Fetter D, Hausenfluck JH, Peng H, Trautman ET, Svirskas RR, Myers  
1361 EW, Iwinski ZR, Aso Y, DePasquale GM, Enos A, Hulamm P, Lam SCB, Li H-H, Laverty  
1362 TR, Long F, Qu L, Murphy SD, Rokicki K, Safford T, Shaw K, Simpson JH, Sowell A,  
1363 Tae S, Yu Y, Zugates CT. 2012. A GAL4-Driver Line Resource for *Drosophila*  
1364 Neurobiology. *Cell Rep* **2**:991–1001. doi:10.1016/j.celrep.2012.09.011
- 1365 Jeong YT, Shim J, Oh SR, Yoon HI, Kim CH, Moon SJ, Montell C. 2013. An Odorant Binding  
1366 Protein required for suppression of sweet taste by bitter chemicals. *Neuron* **79**:725–737.  
1367 doi:10.1016/j.neuron.2013.06.025
- 1368 Johnstun JA, Shankar V, Mokashi SS, Sunkara LT, Iheahuru UE, Lyman RL, Mackay TFC,  
1369 Anholt RRH. 2021. Functional Diversification, Redundancy, and Epistasis among  
1370 Paralogs of the *Drosophila melanogaster* Obp50a-d Gene Cluster. *Mol Biol Evol*  
1371 **38**:2030–2044. doi:10.1093/molbev/msab004

- 1372 Jones P, Binns D, Chang H-Y, Fraser M, Li W, McAnulla C, McWilliam H, Maslen J, Mitchell A,  
1373 Nuka G, Pesseat S, Quinn AF, Sangrador-Vegas A, Scheremetjew M, Yong S-Y, Lopez  
1374 R, Hunter S. 2014. InterProScan 5: genome-scale protein function classification.  
1375 *Bioinformatics* **30**:1236–1240. doi:10.1093/bioinformatics/btu031
- 1376 Jumper J, Evans R, Pritzel A, Green T, Figurnov M, Ronneberger O, Tunyasuvunakool K, Bates  
1377 R, Židek A, Potapenko A, Bridgland A, Meyer C, Kohl SAA, Ballard AJ, Cowie A,  
1378 Romera-Paredes B, Nikolov S, Jain R, Adler J, Back T, Petersen S, Reiman D, Clancy  
1379 E, Zielinski M, Steinegger M, Pacholska M, Berghammer T, Bodenstein S, Silver D,  
1380 Vinyals O, Senior AW, Kavukcuoglu K, Kohli P, Hassabis D. 2021. Highly accurate  
1381 protein structure prediction with AlphaFold. *Nature* **596**:583–589. doi:10.1038/s41586-  
1382 021-03819-2
- 1383 Kalb JM, DiBenedetto AJ, Wolfner MF. 1993. Probing the function of *Drosophila melanogaster*  
1384 accessory glands by directed cell ablation. *Proc Natl Acad Sci U S A* **90**:8093–8097.
- 1385 Kane NS, Vora M, Varre KJ, Padgett RW. 2017. Efficient Screening of CRISPR/Cas9-Induced  
1386 Events in *Drosophila* Using a Co-CRISPR Strategy. *G3 Bethesda Md* **7**:87–93.  
1387 doi:10.1534/g3.116.036723
- 1388 Karr TL, Southern H, Rosenow MA, Gossman TI, Snook RR. 2019. The Old and the New:  
1389 Discovery Proteomics Identifies Putative Novel Seminal Fluid Proteins in *Drosophila*. *Mol*  
1390 *Cell Proteomics MCP* **18**:S23–S33. doi:10.1074/mcp.RA118.001098
- 1391 Kelleher ES, Markow TA. 2009. Duplication, Selection and Gene Conversion in a *Drosophila*  
1392 *mojavensis* Female Reproductive Protein Family. *Genetics* **181**:1451.  
1393 doi:10.1534/genetics.108.099044
- 1394 Kelleher ES, Pennington JE. 2009. Protease Gene Duplication and Proteolytic Activity in  
1395 *Drosophila* Female Reproductive Tracts. *Mol Biol Evol* **26**:2125–2134.  
1396 doi:10.1093/molbev/msp121
- 1397 Kelleher ES, Watts TD, LaFlamme BA, Haynes PA, Markow TA. 2009. Proteomic analysis of  
1398 *Drosophila mojavensis* male accessory glands suggests novel classes of seminal fluid  
1399 proteins. *Insect Biochem Mol Biol* **39**:366–371. doi:10.1016/j.ibmb.2009.03.003
- 1400 Khallaf MA, Cui R, Weißflog J, Erdogmus M, Svatoš A, Dweck HKM, Valenzano DR, Hansson  
1401 BS, Knaden M. 2021. Large-scale characterization of sex pheromone communication  
1402 systems in *Drosophila*. *Nat Commun* **12**:4165. doi:10.1038/s41467-021-24395-z
- 1403 Kim M-S, Repp A, Smith DP. 1998. LUSH Odorant-Binding Protein Mediates Chemosensory  
1404 Responses to Alcohols in *Drosophila melanogaster*. *Genetics* **150**:711–721.  
1405 doi:10.1093/genetics/150.2.711

- 1406 Kondo S, Ueda R. 2013. Highly Improved Gene Targeting by Germline-Specific Cas9  
1407 Expression in Drosophila. *Genetics* **195**:715–721. doi:10.1534/genetics.113.156737
- 1408 Kondrashov FA, Rogozin IB, Wolf YI, Koonin EV. 2002. Selection in the evolution of gene  
1409 duplications. *Genome Biol* **3**:research0008.1. doi:10.1186/gb-2002-3-2-research0008
- 1410 Kopp A, Barmina O, Hamilton AM, Higgins L, McIntyre LM, Jones CD. 2008. Evolution of Gene  
1411 Expression in the Drosophila Olfactory System. *Mol Biol Evol* **25**:1081–1092.  
1412 doi:10.1093/molbev/msn055
- 1413 Kosakovsky Pond SL, Posada D, Gravenor MB, Woelk CH, Frost SDW. 2006. Automated  
1414 Phylogenetic Detection of Recombination Using a Genetic Algorithm. *Mol Biol Evol*  
1415 **23**:1891–1901. doi:10.1093/molbev/msl051
- 1416 Kozlov AM, Darriba D, Flouri T, Morel B, Stamatakis A. 2019. RAXML-NG: a fast, scalable and  
1417 user-friendly tool for maximum likelihood phylogenetic inference. *Bioinformatics*  
1418 **35**:4453–4455. doi:10.1093/bioinformatics/btz305
- 1419 Kumar S, Stecher G, Li M, Knyaz C, Tamura K. 2018. MEGA X: Molecular Evolutionary  
1420 Genetics Analysis across Computing Platforms. *Mol Biol Evol* **35**:1547–1549.  
1421 doi:10.1093/molbev/msy096
- 1422 Kurtovic A, Widmer A, Dickson BJ. 2007. A single class of olfactory neurons mediates  
1423 behavioural responses to a Drosophila sex pheromone. *Nature* **446**:542–546.  
1424 doi:10.1038/nature05672
- 1425 LaFlamme BA, Ravi Ram KR, Wolfner MF. 2012. The Drosophila melanogaster Seminal Fluid  
1426 Protease “Seminase” Regulates Proteolytic and Post-Mating Reproductive Processes.  
1427 *PLOS Genet* **8**:e1002435. doi:10.1371/journal.pgen.1002435
- 1428 Laturney M, Billeter J-C. 2016. Drosophila melanogaster females restore their attractiveness  
1429 after mating by removing male anti-aphrodisiac pheromones. *Nat Commun* **7**:12322.  
1430 doi:10.1038/ncomms12322
- 1431 Laughlin JD, Ha TS, Jones DNM, Smith DP. 2008. Activation of Pheromone-Sensitive Neurons  
1432 Is Mediated by Conformational Activation of Pheromone-Binding Protein. *Cell* **133**:1255–  
1433 1265. doi:10.1016/j.cell.2008.04.046
- 1434 Lee T, Luo L. 1999. Mosaic Analysis with a Repressible Cell Marker for Studies of Gene  
1435 Function in Neuronal Morphogenesis. *Neuron* **22**:451–461. doi:10.1016/S0896-  
1436 6273(00)80701-1
- 1437 Lenth RV, Buerkner P, Giné-Vázquez I, Herve M, Jung M, Love J, Miguez F, Riebl H, Singmann  
1438 H. 2022. emmeans: Estimated Marginal Means, aka Least-Squares Means.



- 1439 Li H, Janssens J, De Waegeneer M, Kolluru SS, Davie K, Gardeux V, Saelens W, David FPA,  
1440 Brbić M, Spanier K, Leskovec J, McLaughlin CN, Xie Q, Jones RC, Brueckner K, Shim J,  
1441 Tattikota SG, Schnorrer F, Rust K, Nystul TG, Carvalho-Santos Z, Ribeiro C, Pal S,  
1442 Mahadevaraju S, Przytycka TM, Allen AM, Goodwin SF, Berry CW, Fuller MT, White-  
1443 Cooper H, Matunis EL, DiNardo S, Galenza A, O'Brien LE, Dow JAT, FCA Consortium§,  
1444 Jasper H, Oliver B, Perrimon N, Deplancke B, Quake SR, Luo L, Aerts S, Agarwal D,  
1445 Ahmed-Braimah Y, Arbeitman M, Ariss MM, Augsburg J, Ayush K, Baker CC, Banisch  
1446 T, Birker K, Bodmer R, Bolival B, Brantley SE, Brill JA, Brown NC, Buehner NA, Cai XT,  
1447 Cardoso-Figueiredo R, Casares F, Chang A, Clandinin TR, Crasta S, Desplan C,  
1448 Detweiler AM, Dhakan DB, Donà E, Engert S, Floc'hlay S, George N, González-Segarra  
1449 AJ, Groves AK, Gumbin S, Guo Y, Harris DE, Heifetz Y, Holtz SL, Horns F, Hudry B,  
1450 Hung R-J, Jan YN, Jaszczak JS, Jefferis GSXE, Karkanas J, Karr TL, Katheder NS,  
1451 Kezos J, Kim AA, Kim SK, Kockel L, Konstantinides N, Kornberg TB, Krause HM, Labott  
1452 AT, Laturney M, Lehmann R, Leinwand S, Li J, Li JSS, Li Kai, Li Ke, Li L, Li T,  
1453 Litovchenko M, Liu H-H, Liu Y, Lu T-C, Manning J, Mase A, Matera-Vatnick M, Matias  
1454 NR, McDonough-Goldstein CE, McGeever A, McLachlan AD, Moreno-Roman P, Neff N,  
1455 Neville M, Ngo S, Nielsen T, O'Brien CE, Osumi-Sutherland D, Özel MN, Papatheodorou  
1456 I, Petkovic M, Pilgrim C, Pisco AO, Reisenman C, Sanders EN, Dos Santos G, Scott K,  
1457 Sherlekar A, Shiu P, Sims D, Sit RV, Slaidina M, Smith HE, Sterne G, Su Y-H, Sutton D,  
1458 Tamayo M, Tan M, Tastekin I, Treiber C, Vacek D, Vogler G, Waddell S, Wang W,  
1459 Wilson RI, Wolfner MF, Wong Y-CE, Xie A, Xu J, Yamamoto S, Yan J, Yao Z, Yoda K,  
1460 Zhu R, Zinzen RP. 2022. Fly Cell Atlas: A single-nucleus transcriptomic atlas of the adult  
1461 fruit fly. *Science* **375**:eabk2432. doi:10.1126/science.abk2432
- 1462 Liu H, Kubli E. 2003. Sex-peptide is the molecular basis of the sperm effect in *Drosophila*  
1463 *melanogaster*. *Proc Natl Acad Sci U S A* **100**:9929–9933. doi:10.1073/pnas.1631700100
- 1464 Lung O, Wolfner MF. 2001. Identification and characterization of the major *Drosophila*  
1465 *melanogaster* mating plug protein. *Insect Biochem Mol Biol* **31**:543–551.  
1466 doi:10.1016/s0965-1748(00)00154-5
- 1467 Majane AC, Cridland JM, Begun DJ. 2022. Single-nucleus transcriptomes reveal evolutionary  
1468 and functional properties of cell types in the *Drosophila* accessory gland. *Genetics*  
1469 **220**:iyab213. doi:10.1093/genetics/iyab213
- 1470 Manier MK, Belote JM, Berben KS, Novikov D, Stuart WT, Pitnick S. 2010. Resolving  
1471 mechanisms of competitive fertilization success in *Drosophila melanogaster*. *Science*  
1472 **328**:354–357. doi:10.1126/science.1187096

- 1473 Manning A. 1967. The control of sexual receptivity in female *Drosophila*. *Anim Behav* **15**:239–  
1474 250. doi:10.1016/0003-3472(67)90006-1
- 1475 Markow TA, Ankney PF. 1988. Insemination Reaction in *Drosophila*: Found in Species Whose  
1476 Males Contribute Material to Oocytes Before Fertilization. *Evolution* **42**:1097–1101.  
1477 doi:10.2307/2408926
- 1478 Mastrogiacomo R, D'Ambrosio C, Niccolini A, Serra A, Gazzano A, Scalonì A, Pelosi P. 2014.  
1479 An Odorant-Binding Protein Is Abundantly Expressed in the Nose and in the Seminal  
1480 Fluid of the Rabbit. *PLoS ONE* **9**:e111932. doi:10.1371/journal.pone.0111932
- 1481 Matsuo T. 2008. Rapid Evolution of Two Odorant-Binding Protein Genes, *Obp57d* and *Obp57e*,  
1482 in the *Drosophila melanogaster* Species Group. *Genetics* **178**:1061–1072.  
1483 doi:10.1534/genetics.107.079046
- 1484 Matsuo T, Sugaya S, Yasukawa J, Aigaki T, Fuyama Y. 2007. Odorant-binding proteins  
1485 *OBP57d* and *OBP57e* affect taste perception and host-plant preference in *Drosophila*  
1486 *sechellia*. *PLoS Biol* **5**:e118. doi:10.1371/journal.pbio.0050118
- 1487 McDonough-Goldstein CE, Pitnick S, Dorus S. 2022. *Drosophila* female reproductive glands  
1488 contribute to mating plug composition and the timing of sperm ejection. *Proc R Soc B*  
1489 *Biol Sci* **289**:20212213. doi:10.1098/rspb.2021.2213
- 1490 McGeary MK, Findlay GD. 2020. Molecular evolution of the sex peptide network in *Drosophila*. *J*  
1491 *Evol Biol* **33**:629–641. doi:10.1111/jeb.13597
- 1492 Misra S, Buehner NA, Singh A, Wolfner MF. 2022. Female factors modulate Sex Peptide's  
1493 association with sperm in *Drosophila melanogaster*. *BMC Biol* **20**:279.  
1494 doi:10.1186/s12915-022-01465-2
- 1495 Misra S, Wolfner MF. 2020. *Drosophila* seminal sex peptide associates with rival as well as own  
1496 sperm, providing SP function in polyandrous females. *eLife* **9**:e58322.  
1497 doi:10.7554/eLife.58322
- 1498 Mueller JL, Ram KR, McGraw LA, Bloch Qazi MC, Siggia ED, Clark AG, Aquadro CF, Wolfner  
1499 MF. 2005. Cross-Species Comparison of *Drosophila* Male Accessory Gland Protein  
1500 Genes. *Genetics* **171**:131–143. doi:10.1534/genetics.105.043844
- 1501 Mueller JL, Ripoll DR, Aquadro CF, Wolfner MF. 2004. Comparative structural modeling and  
1502 inference of conserved protein classes in *Drosophila* seminal fluid. *Proc Natl Acad Sci*  
1503 **101**:13542–13547. doi:10.1073/pnas.0405579101
- 1504 Neubaum DM, Wolfner MF. 1999. Mated *Drosophila melanogaster* females require a seminal  
1505 fluid protein, *Acp36DE*, to store sperm efficiently. *Genetics* **153**:845–857.

- 1506 Ng SH, Shankar S, Shikichi Y, Akasaka K, Mori K, Yew JY. 2014. Pheromone evolution and  
1507 sexual behavior in *Drosophila* are shaped by male sensory exploitation of other males.  
1508 *Proc Natl Acad Sci U S A* **111**:3056–3061. doi:10.1073/pnas.1313615111
- 1509 Ng WC, Chin JSR, Tan KJ, Yew JY. 2015. The fatty acid elongase *Bond* is essential for  
1510 *Drosophila* sex pheromone synthesis and male fertility. *Nat Commun* **6**:8263.  
1511 doi:10.1038/ncomms9263
- 1512 Ohno S. 1970. Evolution by Gene Duplication.
- 1513 Pal S, Oliver B, Przytycka TM. 2022. Stochastic Modeling of Gene Expression Evolution  
1514 Uncovers Tissue- and Sex-Specific Properties of Expression Evolution in the *Drosophila*  
1515 Genus. *J Comput Biol J Comput Mol Cell Biol*. doi:10.1089/cmb.2022.0121
- 1516 Patlar B, Jayaswal V, Ranz JM, Civetta A. 2021. Nonadaptive molecular evolution of seminal  
1517 fluid proteins in *Drosophila*. *Evol Int J Org Evol* **75**:2102–2113. doi:10.1111/evo.14297
- 1518 Patterson JT. 1946. A New Type of Isolating Mechanism in *Drosophila*. *Proc Natl Acad Sci U S*  
1519 *A* **32**:202–208. doi:10.1073/pnas.32.7.202
- 1520 Peng J, Chen S, Büsler S, Liu H, Honegger T, Kubli E. 2005. Gradual Release of Sperm Bound  
1521 Sex-Peptide Controls Female Postmating Behavior in *Drosophila*. *Curr Biol* **15**:207–213.  
1522 doi:10.1016/j.cub.2005.01.034
- 1523 Poe AR, Wang B, Sapar ML, Ji H, Li K, Onabajo T, Fazliyeva R, Gibbs M, Qiu Y, Hu Y, Han C.  
1524 2019. Robust CRISPR/Cas9-Mediated Tissue-Specific Mutagenesis Reveals Gene  
1525 Redundancy and Perdurance in *Drosophila*. *Genetics* **211**:459–472.  
1526 doi:10.1534/genetics.118.301736
- 1527 Ravi Ram KR, Wolfner MF. 2009. A network of interactions among seminal proteins underlies  
1528 the long-term postmating response in *Drosophila*. *Proc Natl Acad Sci* **106**:15384–15389.  
1529 doi:10.1073/pnas.0902923106
- 1530 Raz AA, Vida GS, Stern SR, Mahadevaraju S, Fingerhut JM, Viveiros JM, Pal S, Grey JR,  
1531 Grace MR, Berry CW, Li H, Janssens J, Saelens W, Shao Z, Hun C, Yamashita YM,  
1532 Przytycka TM, Oliver B, Brill JA, Krause HM, Matunis EL, White-Cooper H, DiNardo S,  
1533 Fuller MT. 2022. Emergent dynamics of adult stem cell lineages from single nucleus and  
1534 single cell RNA-Seq of *Drosophila* testes. *bioRxiv* 2022.07.26.501581.  
1535 doi:10.1101/2022.07.26.501581
- 1536 Raza Q, Choi JY, Li Y, O’Dowd RM, Watkins SC, Chikina M, Hong Y, Clark NL, Kwiatkowski  
1537 AV. 2019. Evolutionary rate covariation analysis of E-cadherin identifies Raskol as a  
1538 regulator of cell adhesion and actin dynamics in *Drosophila*. *PLoS Genet* **15**:e1007720.  
1539 doi:10.1371/journal.pgen.1007720

- 1540 Rihani K, Ferveur J-F, Briand L. 2021. The 40-Year Mystery of Insect Odorant-Binding Proteins.  
1541 *Biomolecules* **11**:509. doi:10.3390/biom11040509
- 1542 Rondón JJ, Moreyra NN, Pisarenco VA, Rozas J, Hurtado J, Hasson E. 2022. Evolution of the  
1543 odorant-binding protein gene family in *Drosophila*. *Front Ecol Evol* **10**.
- 1544 Satija R, Farrell JA, Gennert D, Schier AF, Regev A. 2015. Spatial reconstruction of single-cell  
1545 gene expression data. *Nat Biotechnol* **33**:495–502. doi:10.1038/nbt.3192
- 1546 Savini G, Scolari F, Ometto L, Rota-Stabelli O, Carraretto D, Gomulski LM, Gasperi G, Abd-Alla  
1547 AMM, Aksoy S, Attardo GM, Malacrida AR. 2021. Viviparity and habitat restrictions may  
1548 influence the evolution of male reproductive genes in tsetse fly (*Glossina*) species. *BMC*  
1549 *Biol* **19**:211. doi:10.1186/s12915-021-01148-4
- 1550 Scott D. 1986. Sexual mimicry regulates the attractiveness of mated *Drosophila melanogaster*  
1551 females. *Proc Natl Acad Sci U S A* **83**:8429–8433. doi:10.1073/pnas.83.21.8429
- 1552 Sepil I, Br H, R D, MI T, Pd C, R K, R F, Bm K, S W. 2019. Quantitative Proteomics  
1553 Identification of Seminal Fluid Proteins in Male *Drosophila melanogaster*. *Mol Cell*  
1554 *Proteomics MCP* **18**. doi:10.1074/mcp.RA118.000831
- 1555 Shorter JR, Dembeck LM, Everett LJ, Morozova TV, Arya GH, Turlapati L, St. Armour GE,  
1556 Schal C, Mackay TFC, Anholt RRH. 2016. Obp56h Modulates Mating Behavior in  
1557 *Drosophila melanogaster*. *G3 GenesGenomesGenetics* **6**:3335–3342.  
1558 doi:10.1534/g3.116.034595
- 1559 Singer AG, Macrides F, Clancy AN, Agosta WC. 1986. Purification and analysis of a  
1560 proteinaceous aphrodisiac pheromone from hamster vaginal discharge. *J Biol Chem*  
1561 **261**:13323–13326.
- 1562 Singh A, Buehner NA, Lin H, Baranowski KJ, Findlay GD, Wolfner MF. 2018. Long-term  
1563 interaction between *Drosophila* sperm and sex peptide is mediated by other seminal  
1564 proteins that bind only transiently to sperm. *Insect Biochem Mol Biol* **102**:43–51.  
1565 doi:10.1016/j.ibmb.2018.09.004
- 1566 Sirot LK, Findlay GD, Sitnik JL, Frasheri D, Avila FW, Wolfner MF. 2014. Molecular  
1567 Characterization and Evolution of a Gene Family Encoding Both Female- and Male-  
1568 Specific Reproductive Proteins in *Drosophila*. *Mol Biol Evol* **31**:1554–1567.  
1569 doi:10.1093/molbev/msu114
- 1570 Sirot LK, Poulson RL, McKenna MC, Girnary H, Wolfner MF, Harrington LC. 2008. Identity and  
1571 transfer of male reproductive gland proteins of the dengue vector mosquito, *Aedes*  
1572 *aegypti*: potential tools for control of female feeding and reproduction. *Insect Biochem*  
1573 *Mol Biol* **38**:176. doi:10.1016/j.ibmb.2007.10.007

- 1574 Sirot LK, Wong A, Chapman T, Wolfner MF. 2015. Sexual Conflict and Seminal Fluid Proteins:  
1575 A Dynamic Landscape of Sexual Interactions. *Cold Spring Harb Perspect Biol*  
1576 **7**:a017533. doi:10.1101/cshperspect.a017533
- 1577 Sun JS, Xiao S, Carlson JR. 2018. The diverse small proteins called odorant-binding proteins.  
1578 *Open Biol* **8**:180208. doi:10.1098/rsob.180208
- 1579 Sun Y-L, Huang L-Q, Pelosi P, Wang C-Z. 2012. Expression in Antennae and Reproductive  
1580 Organs Suggests a Dual Role of an Odorant-Binding Protein in Two Sibling Helicoverpa  
1581 Species. *PLOS ONE* **7**:e30040. doi:10.1371/journal.pone.0030040
- 1582 Swanson WJ, Clark AG, Waldrip-Dail HM, Wolfner MF, Aquadro CF. 2001. Evolutionary EST  
1583 analysis identifies rapidly evolving male reproductive proteins in *Drosophila*. *Proc Natl*  
1584 *Acad Sci U S A* **98**:7375–7379. doi:10.1073/pnas.131568198
- 1585 Swanson WJ, Vacquier VD. 2002. The rapid evolution of reproductive proteins. *Nat Rev Genet*  
1586 **3**:137–144. doi:10.1038/nrg733
- 1587 Takemori N, Yamamoto M-T. 2009. Proteome mapping of the *Drosophila melanogaster* male  
1588 reproductive system. *Proteomics* **9**:2484–2493. doi:10.1002/pmic.200800795
- 1589 Tamura K, Stecher G, Kumar S. 2021. MEGA11: Molecular Evolutionary Genetics Analysis  
1590 Version 11. *Mol Biol Evol* **38**:3022–3027. doi:10.1093/molbev/msab120
- 1591 Tsuda M, Peyre J-B, Asano T, Aigaki T. 2015. Visualizing Molecular Functions and Cross-  
1592 Species Activity of Sex-Peptide in *Drosophila*. *Genetics* **200**:1161–1169.  
1593 doi:10.1534/genetics.115.177550
- 1594 Vieira FG, Rozas J. 2011. Comparative Genomics of the Odorant-Binding and Chemosensory  
1595 Protein Gene Families across the Arthropoda: Origin and Evolutionary History of the  
1596 Chemosensory System. *Genome Biol Evol* **3**:476–490. doi:10.1093/gbe/evr033
- 1597 Vieira FG, Sánchez-Gracia A, Rozas J. 2007. Comparative genomic analysis of the odorant-  
1598 binding protein family in 12 *Drosophila* genomes: purifying selection and birth-and-death  
1599 evolution. *Genome Biol* **8**:R235. doi:10.1186/gb-2007-8-11-r235
- 1600 Wagstaff BJ, Begun DJ. 2005. Comparative Genomics of Accessory Gland Protein Genes in  
1601 *Drosophila melanogaster* and *D. pseudoobscura*. *Mol Biol Evol* **22**:818–832.  
1602 doi:10.1093/molbev/msi067
- 1603 Wigby S, Brown NC, Allen SE, Misra S, Sitnik JL, Sepil I, Clark AG, Wolfner MF. 2020. The  
1604 *Drosophila* seminal proteome and its role in postcopulatory sexual selection. *Philos*  
1605 *Trans R Soc B Biol Sci* **375**:20200072. doi:10.1098/rstb.2020.0072
- 1606 Xiao S, Sun JS, Carlson JR. 2019. Robust olfactory responses in the absence of odorant  
1607 binding proteins. *eLife* **8**:e51040. doi:10.7554/eLife.51040

- 1608 Xu J, Baulding J, Palli SR. 2013. Proteomics of *Tribolium castaneum* seminal fluid proteins:  
1609 identification of an angiotensin-converting enzyme as a key player in regulation of  
1610 reproduction. *J Proteomics* **78**:83–93. doi:10.1016/j.jprot.2012.11.011
- 1611 Xu P, Atkinson R, Jones DNM, Smith DP. 2005. *Drosophila* OBP LUSH Is Required for Activity  
1612 of Pheromone-Sensitive Neurons. *Neuron* **45**:193–200.  
1613 doi:10.1016/j.neuron.2004.12.031
- 1614 Yang H, Jaime M, Polihronakis M, Kanegawa K, Markow T, Kaneshiro K, Oliver B. 2018. Re-  
1615 annotation of eight *Drosophila* genomes. *Life Sci Alliance* **1**.  
1616 doi:10.26508/lsa.201800156
- 1617 Yang Z. 2007. PAML 4: Phylogenetic Analysis by Maximum Likelihood. *Mol Biol Evol* **24**:1586–  
1618 1591. doi:10.1093/molbev/msm088
- 1619 Yasukawa J, Tomioka S, Aigaki T, Matsuo T. 2010. Evolution of expression patterns of two  
1620 odorant-binding protein genes, *Obp57d* and *Obp57e*, in *Drosophila*. *Gene* **467**:25–34.  
1621 doi:10.1016/j.gene.2010.07.006
- 1622 Yew JY, Dreisewerd K, Luftmann H, Müthing J, Pohlentz G, Kravitz EA. 2009. A new male sex  
1623 pheromone and novel cuticular cues for chemical communication in *Drosophila*. *Curr*  
1624 *Biol CB* **19**:1245–1254. doi:10.1016/j.cub.2009.06.037
- 1625
- 1626
- 1627
- 1628
- 1629
- 1630
- 1631
- 1632
- 1633
- 1634
- 1635
- 1636
- 1637
